# Supplementary material for: Unprecedented polyvinyl polymer loading on SWCNTs in the liquid phase
Source: Royal Society of Chemistry journal article supplement (doi:10.1039/d5nr03041b), 2025-12-10
Supplement: d5nr03041b1.xlsx [file d5nr03041b1.xlsx]

## Sheet: PVT kinetics 3.9 ppm SWCNTs 
Time(s)	qt (µg/g)	Time(s)	qt (mg/g)	Time(s)	qt (mg/g)	Time(s)	qt (mg/g)	Time(s)	qt (mg/g)	Time(s)	qt (mg/g)	Time(s)	qt (mg/g)	Time(s)	qt (mg/g)	Time(s)	qt (mg/g)	Time(s)	qt (mg/g)
ppm of PVT	2.33		5.43		7.91		16.9		25.46		32.13		40.3		51.99		46.42		59.52
PVT:SWCNT stoichiometry	0.6:1		1.4:1		2.1:1		4.4:1		6.7:1		8.4:1		10.6:1		13.6:1		12.2:1		15.6:1
0	0	0	0	0	0	0	0	0	0	0	0	0	0	0	0	0	0	0	0
1	-23.1263	1	7.22666	5	111.339	5	37.1129	5	141.029	5	165.152	5	218.966	5	280.202	5	16.7008	5	144.74
2	-43.616	2	15.9288	10	263.502	10	72.3702	10	411.953	10	252.368	10	389.686	10	467.623	10	96.4936	10	192.987
3	-61.6338	3	25.9747	15	424.943	15	480.612	15	534.426	15	321.027	15	517.725	15	612.363	15	189.276	15	246.801
4	-77.3368	4	37.2401	20	543.704	20	911.122	20	671.744	20	432.365	20	716.279	20	766.382	20	185.565	20	291.336
5	-90.8745	5	49.6087	25	632.775	25	859.164	25	877.72	25	549.271	25	831.329	25	916.689	25	168.864	25	387.83
6	-102.389	6	62.9707	30	710.712	30	1011.33	30	925.967	30	656.899	30	976.07	30	1063.28	30	341.439	30	189.276
7	-112.016	7	77.2236	35	773.804	35	1133.8	35	1020.61	35	745.969	35	1063.28	35	1189.47	35	410.098	35	192.987
8	-119.885	8	92.2711	40	831.329	40	1193.18	40	1124.52	40	825.762	40	1159.78	40	1297.1	40	475.045	40	57.525
9	-126.117	9	108.023	45	872.153	45	1282.25	45	1213.59	45	888.854	45	1261.84	45	1388.02	45	504.736	45	128.04
10	-130.829	10	124.395	50	898.132	50	1373.18	50	1298.95	50	942.668	50	1365.76	50	1465.96	50	528.859	50	363.707
11	-134.132	11	141.308	55	918.545	55	1434.41	55	1378.74	55	989.059	55	1460.39	55	1534.62	55	573.394	55	460.2
12	-136.129	12	158.69	60	929.678	60	1562.45	60	1447.4	60	1035.45	60	1543.9	60	1599.57	60	616.074	60	569.683
13	-136.922	13	176.471	65	944.524	65	1618.12	65	1497.51	65	1070.71	65	1629.26	65	1655.24	65	681.022	65	721.846
14	-136.602	14	194.588	70	953.802	70	1683.07	70	1530.91	70	1105.96	70	1720.18	70	1705.34	70	738.547	70	859.164
15	-135.261	15	212.983	75	966.791	75	1718.33	75	1588.43	75	1146.79	75	1785.13	75	1751.73	75	758.959	75	992.77
16	-132.981	16	231.6	80	977.925	80	1764.72	80	1662.66	80	1185.76	80	1896.47	80	1794.41	80	820.195	80	1079.99
17	-129.844	17	250.389	85	992.77	85	1894.61	85	1738.74	85	1241.43	85	1952.14	85	1833.38	85	829.474	85	1169.06
18	-125.923	18	269.303	90	1011.33	90	1985.54	90	1788.84	90	1282.25	90	2037.5	90	1874.2	90	842.463	90	1163.49
19	-121.291	19	288.299	95	1033.59	95	1905.75	95	1827.81	95	1324.93	95	2132.14	95	1918.74	95	896.277	95	998.337
20	-116.015	20	307.338	100	1061.43	100	1831.52	100	1876.06	100	1376.89	100	2197.08	100	1961.42	100	964.936	100	994.626
21	-110.157	21	326.383	105	1092.98	105	1863.07	105	1920.59	105	1425.14	105	2250.9	105	2011.52	105	1003.9	105	1068.85
22	-103.777	22	345.401	110	1133.8	110	1866.78	110	1976.26	110	1464.1	110	2301	110	2072.76	110	1041.02	110	1115.24
23	-96.9321	23	364.362	115	1170.91	115	1877.91	115	2028.22	115	1501.22	115	2336.26	115	2128.43	115	1076.27	115	1150.5
24	-89.6738	24	383.238	120	1204.31	120	1909.46	120	2080.18	120	1538.33	120	2373.37	120	2184.09	120	1109.68	120	1187.61
25	-82.052	25	402.005	125	1230.29	125	1952.14	125	2108.01	125	1571.73	125	2417.91	125	2239.76	125	1152.36	125	1248.85
26	-74.1129	26	420.639	130	1246.99	130	1979.97	130	2128.43	130	1594	130	2466.15	130	2293.58	130	1217.3	130	1304.52
27	-65.9001	27	439.122	135	1261.84	135	2009.66	135	2161.83	135	1616.27	135	2514.4	135	2345.54	135	1287.82	135	1376.89
28	-57.4541	28	457.434	140	1265.55	140	2065.33	140	2219.35	140	1631.11	140	2555.22	140	2397.49	140	1352.77	140	1451.11
29	-48.8129	29	475.559	145	1265.55	145	2121	145	2288.01	145	1658.95	145	2584.91	145	2447.6	145	1415.86	145	1516.06
30	-40.0118	30	493.484	150	1265.55	150	2184.09	150	2360.38	150	1699.77	150	2623.88	150	2495.84	150	1449.26	150	1573.59
31	-31.0839	31	511.197	155	1276.68	155	2239.76	155	2427.18	155	1736.88	155	2672.13	155	2534.81	155	1467.82	155	1623.69
32	-22.0597	32	528.685	160	1291.53	160	2288.01	160	2471.72	160	1786.99	160	2724.09	160	2573.78	160	1477.09	160	1660.8
33	-12.9679	33	545.941	165	1311.94	165	2332.55	165	2495.84	165	1846.37	165	2777.9	165	2603.47	165	1497.51	165	1720.18
34	-3.83458	34	562.956	170	1328.64	170	2369.66	170	2488.42	170	1913.17	170	2835.43	170	2629.45	170	1501.22	170	1770.29
35	5.31571	35	579.724	175	1347.2	175	2390.07	175	2449.45	175	1978.12	175	2892.95	175	2649.86	175	1449.26	175	1799.98
36	14.4605	36	596.24	180	1360.19	180	2393.78	180	2438.32	180	2046.78	180	2915.22	180	2679.55	180	1388.02	180	1829.67
37	23.5792	37	612.499	185	1365.76	185	2412.34	185	2458.73	185	2096.88	185	2941.2	185	2707.39	185	1386.17	185	1851.93
38	32.6526	38	628.499	190	1365.76	190	2453.16	190	2482.85	190	2132.14	190	2954.19	190	2737.08	190	1436.27	190	1859.36
39	41.6636	39	644.237	195	1367.61	195	2497.7	195	2514.4	195	2165.54	195	2961.61	195	2768.62	195	1491.94	195	1874.2
40	50.5961	40	659.712	200	1362.04	200	2547.8	200	2560.79	200	2191.52	200	2983.88	200	2796.46	200	1525.34	200	1907.6
41	59.4357	41	674.924	205	1358.33	205	2560.79	205	2612.75	205	2210.07	205	3020.99	205	2826.15	205	1568.02	205	1944.72
42	68.1696	42	689.873	210	1354.62	210	2558.94	210	2661	210	2217.5	210	3056.25	210	2855.84	210	1614.41	210	1994.82
43	76.7857	43	704.559	215	1352.77	215	2532.96	215	2707.39	215	2219.35	215	3085.94	215	2881.82	215	1666.37	215	2037.5
44	85.2737	44	718.985	220	1349.05	220	2482.85	220	2742.64	220	2208.22	220	3126.76	220	2898.52	220	1707.19	220	2080.18
45	93.6241	45	733.153	225	1347.2	225	2432.75	225	2764.91	225	2193.37	225	3162.02	225	2918.93	225	1738.74	225	2132.14
46	101.829	46	747.064	230	1349.05	230	2399.35	230	2802.02	230	2178.53	230	3200.99	230	2933.78	230	1759.15	230	2195.23
47	109.88	47	760.722	235	1350.91	235	2404.92	235	2829.86	235	2172.96	235	3243.67	235	2950.48	235	1781.42	235	2247.19
48	117.772	48	774.131	240	1352.77	240	2442.03	240	2842.85	240	2180.38	240	3284.49	240	2967.18	240	1816.68	240	2278.73
49	125.499	49	787.294	245	1354.62	245	2469.86	245	2842.85	245	2180.38	245	3316.04	245	2987.59	245	1835.23	245	2302.86
50	133.056	50	800.214	250	1362.04	250	2479.14	250	2828	250	2198.94	250	3353.15	250	3006.15	250	1866.78	250	2325.12
51	140.44	51	812.897	255	1369.47	255	2508.83	255	2818.73	255	2221.21	255	3373.56	255	3028.41	255	1903.89	255	2339.97
52	147.648	52	825.346	260	1376.89	260	2588.63	260	2844.7	260	2237.91	260	3399.54	260	3041.4	260	1941.01	260	2356.67
53	154.676	53	837.567	265	1384.31	265	2661	265	2891.1	265	2247.19	265	3427.38	265	3059.96	265	1979.97	265	2356.67
54	161.524	54	849.563	270	1393.59	270	2709.24	270	2928.21	270	2263.89	270	3445.93	270	3080.37	270	2035.64	270	2377.08
55	168.191	55	861.339	275	1399.16	275	2720.38	275	2963.47	275	2275.02	275	3460.78	275	3098.93	275	2069.04	275	2406.77
56	174.675	56	872.901	280	1402.87	280	2746.36	280	2996.87	280	2289.87	280	3470.06	280	3115.63	280	2083.89	280	2430.9
57	180.977	57	884.254	285	1404.72	285	2774.19	285	3032.12	285	2302.86	285	3484.9	285	3132.33	285	2095.02	285	2455.02
58	187.096	58	895.401	290	1402.87	290	2803.88	290	3054.39	290	2321.41	290	3494.18	290	3150.89	290	2108.01	290	2464.3
59	193.035	59	906.348	295	1399.16	295	2852.13	295	3069.24	295	2339.97	295	3501.6	295	3171.3	295	2126.57	295	2475.43
60	198.793	60	917.101	300	1389.88	300	2874.39	300	3069.24	300	2358.53	300	3520.16	300	3191.71	300	2143.27	300	2469.86
61	204.374	61	927.662	305	1382.46	305	2879.96	305	3054.39	305	2382.65	305	3538.72	305	3221.4	305	2161.83	305	2462.44
62	209.778	62	938.038	310	1369.47	310	2887.38	310	3041.4	310	2408.63	310	3560.98	310	3247.38	310	2185.95	310	2468.01
63	215.007	63	948.233	315	1362.04	315	2857.69	315	3033.98	315	2438.32	315	3577.68	315	3271.5	315	2215.64	315	2490.28
64	220.066	64	958.252	320	1349.05	320	2844.7	320	3037.69	320	2473.58	320	3607.37	320	3297.48	320	2249.04	320	2510.69
65	224.955	65	968.098	325	1343.49	325	2848.42	325	3050.68	325	2506.98	325	3638.92	325	3327.17	325	2289.87	325	2540.38
66	229.678	66	977.777	330	1336.06	330	2852.13	330	3084.08	330	2540.38	330	3670.47	330	3355.01	330	2328.84	330	2571.92
67	234.239	67	987.291	335	1334.21	335	2848.42	335	3121.2	335	2571.92	335	3698.3	335	3380.99	335	2360.38	335	2596.05
68	238.641	68	996.646	340	1336.06	340	2842.85	340	3145.32	340	2570.07	340	3720.57	340	3410.68	340	2393.78	340	2618.32
69	242.887	69	1005.84	345	1339.78	345	2876.25	345	3167.59	345	2570.07	345	3742.84	345	3445.93	345	2417.91	345	2649.86
70	246.981	70	1014.89	350	1349.05	350	2982.02	350	3191.71	350	2558.94	350	3761.39	350	3479.34	350	2427.18	350	2675.84
71	250.927	71	1023.79	355	1358.33	355	3091.51	355	3219.54	355	2545.95	355	3778.09	355	3520.16	355	2417.91	355	2699.96
72	254.729	72	1032.54	360	1375.03	360	3126.76	360	3249.24	360	2549.66	360	3791.08	360	3553.56	360	2397.49	360	2722.23
73	258.39	73	1041.15	365	1393.59	365	3106.35	365	3286.35	365	2566.36	365	3809.64	365	3586.96	365	2373.37	365	2735.22
74	261.915	74	1049.62	370	1414	370	3110.06	370	3314.18	370	2596.05	370	3828.2	370	3620.36	370	2365.95	370	2766.77
75	265.308	75	1057.96	375	1436.27	375	3128.62	375	3340.16	375	2620.17	375	3850.46	375	3655.62	375	2373.37	375	2800.17
76	268.573	76	1066.16	380	1456.68	380	3145.32	380	3360.57	380	2648.01	380	3863.45	380	3689.02	380	2384.5	380	2828
77	271.714	77	1074.22	385	1473.38	385	3171.3	385	3373.56	385	2664.71	385	3882.01	385	3724.28	385	2410.48	385	2846.56
78	274.735	78	1082.16	390	1486.37	390	3189.85	390	3386.55	390	2675.84	390	3900.57	390	3753.97	390	2432.75	390	2852.13
79	277.641	79	1089.97	395	1493.79	395	3217.69	395	3397.69	395	2688.83	395	3917.27	395	3779.95	395	2456.87	395	2846.56
80	280.435	80	1097.66	400	1491.94	400	3265.94	400	3414.39	400	2703.68	400	3937.68	400	3794.8	400	2475.43	400	2831.72
81	283.123	81	1105.22	405	1491.94	405	3323.46	405	3429.23	405	2727.8	405	3963.66	405	3800.36	405	2482.85	405	2807.59
82	285.706	82	1112.66	410	1493.79	410	3356.86	410	3444.08	410	2761.2	410	3997.06	410	3802.22	410	2484.71	410	2800.17
83	288.191	83	1119.98	415	1503.07	415	3369.85	415	3455.21	415	2792.75	415	4023.04	415	3792.94	415	2477.29	415	2807.59
84	290.581	84	1127.17	420	1517.92	420	3364.29	420	3462.63	420	2833.57	420	4045.31	420	3779.95	420	2484.71	420	2805.74
85	292.879	85	1134.25	425	1536.47	425	3310.47	425	3471.91	425	2872.54	425	4067.57	425	3766.96	425	2512.54	425	2792.75
86	295.091	86	1141.21	430	1558.74	430	3258.51	430	3488.61	430	2904.09	430	4086.13	430	3763.25	430	2549.66	430	2790.89
87	297.219	87	1148.05	435	1582.87	435	3293.77	435	3503.46	435	2931.92	435	4097.27	435	3781.81	435	2579.35	435	2805.74
88	299.267	88	1154.78	440	1599.57	440	3330.88	440	3520.16	440	2950.48	440	4108.4	440	3805.93	440	2599.76	440	2829.86
89	301.239	89	1161.39	445	1610.7	445	3347.58	445	3533.15	445	2965.32	445	4113.97	445	3843.04	445	2605.33	445	2850.27
90	303.139	90	1167.88	450	1612.56	450	3355.01	450	3555.42	450	2967.18	450	4123.24	450	3882.01	450	2618.32	450	2850.27
91	304.97	91	1174.25	455	1603.28	455	3364.29	455	3583.25	455	2970.89	455	4136.23	455	3915.41	455	2620.17	455	2863.26
92	306.736	92	1180.51	460	1590.29	460	3380.99	460	3609.23	460	2970.89	460	4149.22	460	3943.25	460	2635.02	460	2883.67
93	308.44	93	1186.65	465	1569.88	465	3392.12	465	3633.35	465	2983.88	465	4164.07	465	3965.51	465	2659.14	465	2894.81
94	310.084	94	1192.68	470	1547.61	470	3399.54	470	3651.91	470	3002.43	470	4178.91	470	3987.78	470	2694.4	470	2898.52
95	311.673	95	1198.58	475	1525.34	475	3401.4	475	3668.61	475	3024.7	475	4188.19	475	3998.92	475	2733.37	475	2909.65
96	313.21	96	1204.37	480	1504.93	480	3399.54	480	3676.03	480	3063.67	480	4197.47	480	4002.63	480	2770.48	480	2924.5
97	314.696	97	1210.04	485	1488.23	485	3388.41	485	3681.6	485	3098.93	485	4208.6	485	4006.34	485	2796.46	485	2937.49
98	316.136	98	1215.59	490	1471.53	490	3375.42	490	3687.17	490	3130.47	490	4223.45	490	4006.34	490	2805.74	490	2946.77
99	317.531	99	1221.02	495	1462.25	495	3364.29	495	3700.16	495	3160.16	495	4240.15	495	4004.48	495	2794.6	495	2950.48
100	318.885	100	1226.33	500	1454.83	500	3342.02	500	3716.86	500	3173.15	500	4255	500	4000.77	500	2777.9	500	2959.75
101	320.2	101	1231.51	505	1447.4	505	3321.61	505	3733.56	505	3176.87	505	4273.55	505	4002.63	505	2763.06	505	2967.18
102	321.479	102	1236.58	510	1447.4	510	3308.62	510	3753.97	510	3176.87	510	4286.54	510	4008.19	510	2751.92	510	2978.31
103	322.723	103	1241.52	515	1447.4	515	3306.76	515	3772.53	515	3176.87	515	4301.39	515	4013.76	515	2748.21	515	2993.16
104	323.935	104	1246.33	520	1449.26	520	3308.62	520	3789.23	520	3173.15	520	4306.95	520	4023.04	520	2748.21	520	2995.01
105	325.117	105	1251.02	525	1454.83	525	3321.61	525	3809.64	525	3162.02	525	4314.38	525	4026.75	525	2755.63	525	3000.58
106	326.271	106	1255.57	530	1464.1	530	3353.15	530	3828.2	530	3154.6	530	4318.09	530	4030.46	530	2766.77	530	3008
107	327.399	107	1260	535	1469.67	535	3397.69	535	3839.33	535	3156.45	535	4323.65	535	4028.61	535	2781.61	535	3022.85
108	328.503	108	1264.31	540	1478.95	540	3445.93	540	3848.61	540	3160.16	540	4325.51	540	4037.88	540	2794.6	540	3026.56
109	329.585	109	1268.47	545	1482.66	545	3481.19	545	3857.89	545	3165.73	545	4327.37	545	4047.16	545	2802.02	545	3032.12
110	330.645	110	1272.51	550	1488.23	550	3496.04	550	3857.89	550	3169.44	550	4323.65	550	4060.15	550	2820.58	550	3037.69
111	331.686	111	1276.41	555	1495.65	555	3494.18	555	3856.03	555	3180.58	555	4321.8	555	4071.29	555	2846.56	555	3048.83
112	332.71	112	1280.18	560	1499.36	560	3483.05	560	3850.46	560	3182.43	560	4323.65	560	4086.13	560	2868.83	560	3061.82
113	333.716	113	1283.81	565	1499.36	565	3473.77	565	3846.75	565	3189.85	565	4321.8	565	4108.4	565	2885.53	565	3067.38
114	334.708	114	1287.3	570	1499.36	570	3477.48	570	3844.9	570	3199.13	570	4323.65	570	4125.1	570	2896.66	570	3082.23
115	335.685	115	1290.66	575	1495.65	575	3501.6	575	3846.75	575	3213.98	575	4331.08	575	4145.51	575	2907.8	575	3093.36
116	336.649	116	1293.87	580	1493.79	580	3533.15	580	3848.61	580	3232.53	580	4344.07	580	4162.21	580	2909.65	580	3104.49
117	337.601	117	1296.95	585	1493.79	585	3562.84	585	3857.89	585	3249.24	585	4357.06	585	4178.91	585	2920.79	585	3106.35
118	338.542	118	1299.88	590	1491.94	590	3598.1	590	3865.31	590	3265.94	590	4375.61	590	4193.76	590	2918.93	590	3117.48
119	339.472	119	1302.67	595	1493.79	595	3624.08	595	3874.59	595	3275.21	595	4392.31	595	4212.32	595	2917.07	595	3134.19
120	340.393	120	1305.31	600	1493.79	600	3625.93	600	3889.43	600	3288.2	600	4414.58	600	4232.73	600	2905.94	600	3160.16
121	341.304	121	1307.81	605	1493.79	605	3616.65	605	3904.28	605	3297.48	605	4436.85	605	4243.86	605	2898.52	605	3184.29
122	342.207	122	1310.16	610	1495.65	610	3611.09	610	3922.83	610	3306.76	610	4457.26	610	4264.27	610	2885.53	610	3210.27
123	343.103	123	1312.37	615	1499.36	615	3611.09	615	3939.54	615	3317.89	615	4473.96	615	4282.83	615	2879.96	615	3234.39
124	343.991	124	1314.43	620	1501.22	620	3620.36	620	3952.52	620	3327.17	620	4492.52	620	4295.82	620	2879.96	620	3247.38
125	344.872	125	1316.34	625	1503.07	625	3635.21	625	3959.95	625	3340.16	625	4505.51	625	4310.66	625	2876.25	625	3260.37
126	345.746	126	1318.1	630	1504.93	630	3651.91	630	3958.09	630	3356.86	630	4516.64	630	4323.65	630	2876.25	630	3280.78
127	346.614	127	1319.71	635	1503.07	635	3661.19	635	3958.09	635	3373.56	635	4527.78	635	4332.93	635	2872.54	635	3284.49
128	347.476	128	1321.17	640	1503.07	640	3664.9	640	3961.8	640	3382.84	640	4542.62	640	4338.5	640	2879.96	640	3303.05
129	348.332	129	1322.48	645	1503.07	645	3657.48	645	3969.23	645	3399.54	645	4557.47	645	4349.63	645	2891.1	645	3327.17
130	349.182	130	1323.65	650	1501.22	650	3640.78	650	3974.79	650	3405.11	650	4568.6	650	4360.77	650	2905.94	650	3349.44
131	350.026	131	1324.66	655	1499.36	655	3624.08	655	3984.07	655	3408.82	655	4581.59	655	4370.05	655	2922.64	655	3342.02
132	350.864	132	1325.52	660	1499.36	660	3614.8	660	3995.2	660	3406.97	660	4589.01	660	4379.32	660	2943.05	660	3334.59
133	351.697	133	1326.23	665	1497.51	665	3609.23	665	4008.19	665	3408.82	665	4594.58	665	4384.89	665	2959.75	665	3336.45
134	352.524	134	1326.79	670	1495.65	670	3607.37	670	4013.76	670	3406.97	670	4600.15	670	4386.75	670	2972.74	670	3355.01
135	353.344	135	1327.2	675	1495.65	675	3592.53	675	4015.62	675	3405.11	675	4605.71	675	4396.02	675	2983.88	675	3379.13
136	354.159	136	1327.45	680	1497.51	680	3586.96	680	4017.47	680	3405.11	680	4614.99	680	4405.3	680	2995.01	680	3392.12
137	354.967	137	1327.56	685	1499.36	685	3575.83	685	4015.62	685	3408.82	685	4624.27	685	4403.45	685	3006.15	685	3386.55
138	355.769	138	1327.52	690	1503.07	690	3559.13	690	4017.47	690	3414.39	690	4631.69	690	4410.87	690	3017.28	690	3399.54
139	356.563	139	1327.34	695	1506.78	695	3546.14	695	4011.91	695	3421.81	695	4642.83	695	4416.44	695	3028.41	695	3401.4
140	357.351	140	1327	700	1510.5	700	3535	700	4011.91	700	3438.51	700	4657.67	700	4420.15	700	3032.12	700	3408.82
141	358.132	141	1326.52	705	1512.35	705	3527.58	705	4017.47	705	3449.64	705	4672.52	705	4427.57	705	3041.4	705	3423.67
142	358.904	142	1325.89	710	1516.06	710	3527.58	710	4023.04	710	3458.92	710	4685.5	710	4434.99	710	3063.67	710	3431.09
143	359.669	143	1325.12	715	1519.77	715	3529.44	715	4032.32	715	3470.06	715	4692.93	715	4444.27	715	3080.37	715	3436.66
144	360.425	144	1324.2	720	1523.48	720	3531.29	720	4047.16	720	3486.76	720	4692.93	720	4453.55	720	3093.36	720	3449.64
145	361.172	145	1323.14	725	1529.05	725	3531.29	725	4054.59	725	3499.75	725	4696.64	725	4462.83	725	3115.63	725	3464.49
146	361.911	146	1321.94	730	1536.47	730	3527.58	730	4069.43	730	3510.88	730	4704.06	730	4464.68	730	3137.9	730	3477.48
147	362.639	147	1320.6	735	1542.04	735	3518.3	735	4082.42	735	3523.87	735	4713.34	735	4470.25	735	3158.31	735	3494.18
148	363.358	148	1319.13	740	1547.61	740	3499.75	740	4093.55	740	3527.58	740	4715.2	740	4479.53	740	3182.43	740	3522.02
149	364.066	149	1317.51	745	1553.18	745	3486.76	745	4106.54	745	3533.15	745	4713.34	745	4485.1	745	3197.28	745	3533.15
150	364.763	150	1315.77	750	1562.45	750	3488.61	750	4119.53	750	3538.72	750	4715.2	750	4485.1	750	3204.7	750	3538.72
151	365.449	151	1313.89	755	1569.88	755	3512.74	755	4132.52	755	3542.43	755	4724.47	755	4494.37	755	3215.83	755	3546.14
152	366.123	152	1311.88	760	1577.3	760	3538.72	760	4143.66	760	3542.43	760	4730.04	760	4499.94	760	3225.11	760	3546.14
153	366.784	153	1309.74	765	1586.58	765	3564.7	765	4154.79	765	3547.99	765	4733.75	765	4507.36	765	3230.68	765	3555.42
154	367.433	154	1307.48	770	1595.86	770	3586.96	770	4165.92	770	3551.71	770	4739.32	770	4512.93	770	3241.81	770	3559.13
155	368.069	155	1305.1	775	1605.13	775	3599.95	775	4178.91	775	3557.27	775	4743.03	775	4518.5	775	3256.66	775	3566.55
156	368.69	156	1302.59	780	1608.84	780	3601.81	780	4188.19	780	3559.13	780	4743.03	780	4522.21	780	3273.36	780	3577.68
157	369.298	157	1299.96	785	1616.27	785	3607.37	785	4195.61	785	3564.7	785	4752.31	785	4525.92	785	3297.48	785	3583.25
158	369.891	158	1297.22	790	1621.83	790	3620.36	790	4199.33	790	3570.26	790	4765.3	790	4533.34	790	3321.61	790	3596.24
159	370.469	159	1294.37	795	1623.69	795	3637.07	795	4204.89	795	3575.83	795	4782	795	4540.76	795	3345.73	795	3607.37
160	371.032	160	1291.41	800	1625.55	800	3646.34	800	4212.32	800	3581.4	800	4798.7	800	4553.75	800	3369.85	800	3616.65
161	371.578	161	1288.34	805	1625.55	805	3648.2	805	4217.88	805	3590.67	805	4815.4	805	4563.03	805	3388.41	805	3618.51
162	372.108	162	1285.16	810	1627.4	810	3642.63	810	4227.16	810	3599.95	810	4832.1	810	4572.31	810	3406.97	810	3624.08
163	372.621	163	1281.89	815	1627.4	815	3635.21	815	4240.15	815	3612.94	815	4848.8	815	4587.16	815	3416.24	815	3624.08
164	373.117	164	1278.52	820	1631.11	820	3624.08	820	4251.28	820	3625.93	820	4865.5	820	4602	820	3429.23	820	3625.93
165	373.596	165	1275.05	825	1634.82	825	3624.08	825	4264.27	825	3640.78	825	4878.49	825	4616.85	825	3442.22	825	3616.65
166	374.056	166	1271.49	830	1638.53	830	3627.79	830	4280.97	830	3657.48	830	4885.91	830	4629.84	830	3449.64	830	3618.51
167	374.498	167	1267.85	835	1644.1	835	3633.35	835	4297.67	835	3672.32	835	4891.48	835	4648.39	835	3468.2	835	3624.08
168	374.921	168	1264.12	840	1649.67	840	3638.92	840	4314.38	840	3690.88	840	4895.19	840	4666.95	840	3488.61	840	3629.64
169	375.324	169	1260.31	845	1657.09	845	3646.34	845	4331.08	845	3715	845	4895.19	845	4689.22	845	3514.59	845	3637.07
170	375.709	170	1256.42	850	1664.51	850	3650.05	850	4344.07	850	3739.13	850	4897.05	850	4700.35	850	3538.72	850	3640.78
171	376.073	171	1252.46	855	1675.65	855	3651.91	855	4357.06	855	3763.25	855	4902.62	855	4711.48	855	3555.42	855	3648.2
172	376.418	172	1248.43	860	1681.21	860	3651.91	860	4371.9	860	3787.37	860	4904.47	860	4722.62	860	3573.97	860	3657.48
173	376.742	173	1244.34	865	1688.64	865	3653.77	865	4394.17	865	3804.07	865	4910.04	865	4744.89	865	3594.39	865	3655.62
174	377.045	174	1240.18	870	1692.35	870	3655.62	870	4418.29	870	3815.21	870	4913.75	870	4761.59	870	3607.37	870	3670.47
175	377.328	175	1235.97	875	1696.06	875	3664.9	875	4436.85	875	3826.34	875	4921.17	875	4778.29	875	3624.08	875	3674.18
176	377.589	176	1231.7	880	1699.77	880	3670.47	880	4447.98	880	3833.76	880	4932.31	880	4783.85	880	3633.35	880	3681.6
177	377.829	177	1227.39	885	1701.63	885	3679.75	885	4455.4	885	3833.76	885	4939.73	885	4793.13	885	3642.63	885	3694.59
178	378.047	178	1223.03	890	1705.34	890	3685.31	890	4457.26	890	3831.91	890	4949.01	890	4802.41	890	3642.63	890	3709.44
179	378.244	179	1218.62	895	1703.48	895	3689.02	895	4455.4	895	3826.34	895	4954.57	895	4811.69	895	3646.34	895	3722.42
180	378.419	180	1214.18	900	1705.34	900	3689.02	900	4453.55	900	3817.06	900	4962	900	4824.68	900	3648.2	900	3735.41
181	378.572	181	1209.71	905	1705.34	905	3685.31	905	4455.4	905	3807.78	905	4971.27	905	4833.96	905	3659.33	905	3742.84
182	378.702	182	1205.21	910	1707.19	910	3690.88	910	4455.4	910	3792.94	910	4978.7	910	4839.52	910	3674.18	910	3763.25
183	378.81	183	1200.68	915	1709.05	915	3703.87	915	4460.97	915	3779.95	915	4978.7	915	4850.66	915	3694.59	915	3772.53
184	378.896	184	1196.13	920	1709.05	920	3724.28	920	4468.39	920	3766.96	920	4982.41	920	4858.08	920	3716.86	920	3781.81
185	378.96	185	1191.57	925	1705.34	925	3746.55	925	4475.82	925	3757.68	925	4987.98	925	4859.94	925	3739.13	925	3792.94
186	379.001	186	1186.99	930	1703.48	930	3768.82	930	4483.24	930	3748.4	930	4991.69	930	4863.65	930	3765.1	930	3792.94
187	379.019	187	1182.41	935	1701.63	935	3785.52	935	4490.66	935	3737.27	935	4999.11	935	4867.36	935	3787.37	935	3805.93
188	379.016	188	1177.83	940	1697.92	940	3791.08	940	4496.23	940	3724.28	940	5002.82	940	4871.07	940	3813.35	940	3817.06
189	378.989	189	1173.24	945	1694.2	945	3791.08	945	4499.94	945	3713.15	945	5006.53	945	4878.49	945	3844.9	945	3824.49
190	378.941	190	1168.66	950	1692.35	950	3779.95	950	4505.51	950	3700.16	950	5008.39	950	4882.2	950	3867.17	950	3826.34
191	378.87	191	1164.09	955	1694.2	955	3761.39	955	4507.36	955	3687.17	955	5015.81	955	4884.06	955	3889.43	955	3831.91
192	378.776	192	1159.54	960	1692.35	960	3744.69	960	4503.65	960	3679.75	960	5013.95	960	4882.2	960	3907.99	960	3844.9
193	378.661	193	1155	965	1694.2	965	3729.85	965	4498.08	965	3677.89	965	5010.24	965	4882.2	965	3924.69	965	3852.32
194	378.524	194	1150.48	970	1697.92	970	3724.28	970	4494.37	970	3685.31	970	5008.39	970	4882.2	970	3933.97	970	3869.02
195	378.364	195	1146	975	1697.92	975	3722.42	975	4488.81	975	3690.88	975	5017.67	975	4885.91	975	3943.25	975	3880.15
196	378.183	196	1141.54	980	1699.77	980	3727.99	980	4483.24	980	3685.31	980	5021.38	980	4891.48	980	3939.54	980	3896.86
197	377.981	197	1137.12	985	1699.77	985	3733.56	985	4475.82	985	3690.88	985	5030.65	985	4898.9	985	3943.25	985	3909.85
198	377.757	198	1132.73	990	1703.48	990	3742.84	990	4475.82	990	3724.28	990	5041.79	990	4911.89	990	3941.39	990	3922.83
199	377.512	199	1128.39	995	1705.34	995	3752.12	995	4485.1	995	3765.1	995	5051.07	995	4923.03	995	3922.83	995	3939.54
200	377.246	200	1124.1	1000	1709.05	1000	3768.82	1000	4501.8	1000	3802.22	1000	5064.06	1000	4937.87	1000	3904.28	1000	3959.95
201	376.959	201	1119.86	1005	1712.76	1005	3787.37	1005	4520.35	1005	3813.35	1005	5071.48	1005	4943.44	1005	3895	1005	3972.94
202	376.652	202	1115.68	1010	1716.47	1010	3807.78	1010	4537.05	1010	3798.51	1010	5078.9	1010	4950.86	1010	3880.15	1010	3993.35
203	376.325	203	1111.55	1015	1722.04	1015	3820.77	1015	4550.04	1015	3778.09	1015	5088.18	1015	4954.57	1015	3865.31	1015	4011.91
204	375.978	204	1107.49	1020	1725.75	1020	3837.47	1020	4557.47	1020	3761.39	1020	5090.04	1020	4960.14	1020	3852.32	1020	4019.33
205	375.611	205	1103.5	1025	1727.61	1025	3850.46	1025	4557.47	1025	3748.4	1025	5091.89	1025	4965.71	1025	3839.33	1025	4037.88
206	375.226	206	1099.57	1030	1731.32	1030	3859.74	1030	4551.9	1030	3740.98	1030	5097.46	1030	4971.27	1030	3820.77	1030	4050.87
207	374.821	207	1095.73	1035	1733.17	1035	3872.73	1035	4542.62	1035	3729.85	1035	5099.31	1035	4976.84	1035	3807.78	1035	4065.72
208	374.398	208	1091.96	1040	1736.88	1040	3878.3	1040	4535.2	1040	3718.71	1040	5103.03	1040	4978.7	1040	3792.94	1040	4080.56
209	373.958	209	1088.27	1045	1733.17	1045	3878.3	1045	4525.92	1045	3711.29	1045	5108.59	1045	4989.83	1045	3779.95	1045	4095.41
210	373.499	210	1084.67	1050	1735.03	1050	3882.01	1050	4518.5	1050	3689.02	1050	5112.3	1050	4993.54	1050	3768.82	1050	4115.82
211	373.023	211	1081.16	1055	1735.03	1055	3891.29	1055	4514.79	1055	3674.18	1055	5121.58	1055	4995.4	1055	3766.96	1055	4139.95
212	372.53	212	1077.74	1060	1733.17	1060	3902.42	1060	4507.36	1060	3650.05	1060	5129	1060	4999.11	1060	3765.1	1060	4160.36
213	372.021	213	1074.42	1065	1731.32	1065	3906.13	1065	4503.65	1065	3637.07	1065	5140.14	1065	5004.68	1065	3770.67	1065	4177.06
214	371.496	214	1071.19	1070	1729.46	1070	3906.13	1070	4501.8	1070	3637.07	1070	5147.56	1070	5012.1	1070	3779.95	1070	4184.48
215	370.955	215	1068.07	1075	1723.89	1075	3906.13	1075	4499.94	1075	3650.05	1075	5160.55	1075	5019.52	1075	3791.08	1075	4186.34
216	370.399	216	1065.06	1080	1716.47	1080	3907.99	1080	4499.94	1080	3677.89	1080	5171.68	1080	5026.94	1080	3809.64	1080	4180.77
217	369.829	217	1062.15	1085	1709.05	1085	3911.7	1085	4498.08	1085	3711.29	1085	5184.67	1085	5036.22	1085	3828.2	1085	4184.48
218	369.245	218	1059.36	1090	1701.63	1090	3915.41	1090	4498.08	1090	3748.4	1090	5201.37	1090	5045.5	1090	3846.75	1090	4186.34
219	368.646	219	1056.68	1095	1694.2	1095	3917.27	1095	4499.94	1095	3785.52	1095	5208.8	1095	5052.92	1095	3865.31	1095	4190.05
220	368.035	220	1054.12	1100	1683.07	1100	3922.83	1100	4499.94	1100	3818.92	1100	5223.64	1100	5065.91	1100	3889.43	1100	4197.47
221	367.411	221	1051.68	1105	1668.23	1105	3928.4	1105	4501.8	1105	3850.46	1105	5238.49	1105	5071.48	1105	3909.85	1105	4203.04
222	366.775	222	1049.36	1110	1671.94	1110	3932.11	1110	4503.65	1110	3876.44	1110	5255.19	1110	5075.19	1110	3932.11	1110	4206.75
223	366.128	223	1047.17	1115	1677.5	1115	3933.97	1115	4503.65	1115	3900.57	1115	5264.47	1115	5084.47	1115	3952.52	1115	4216.03
224	365.47	224	1045.11	1120	1662.66	1120	3935.82	1120	4507.36	1120	3924.69	1120	5268.18	1120	5091.89	1120	3976.65	1120	4223.45
225	364.801	225	1043.17	1125	1640.39	1125	3930.26	1125	4509.22	1125	3937.68	1125	5273.74	1125	5095.6	1125	3998.92	1125	4229.02
226	364.122	226	1041.37	1130	1625.55	1130	3926.55	1130	4512.93	1130	3946.96	1130	5275.6	1130	5103.03	1130	4015.62	1130	4238.29
227	363.434	227	1039.7	1135	1618.12	1135	3919.12	1135	4522.21	1135	3954.38	1135	5277.46	1135	5110.45	1135	4030.46	1135	4234.58
228	362.737	228	1038.17	1140	1608.84	1140	3915.41	1140	4531.49	1140	3954.38	1140	5279.31	1140	5116.01	1140	4043.45	1140	4243.86
229	362.031	229	1036.78	1145	1597.71	1145	3915.41	1145	4542.62	1145	3952.52	1145	5281.17	1145	5123.44	1145	4050.87	1145	4242.01
230	361.318	230	1035.53	1150	1590.29	1150	3907.99	1150	4551.9	1150	3952.52	1150	5281.17	1150	5129	1150	4063.86	1150	4249.43
231	360.599	231	1034.42	1155	1584.72	1155	3904.28	1155	4563.03	1155	3945.1	1155	5283.02	1155	5138.28	1155	4063.86	1155	4256.85
232	359.872	232	1033.46	1160	1575.44	1160	3898.71	1160	4566.74	1160	3941.39	1160	5283.02	1160	5141.99	1160	4065.72	1160	4266.13
233	359.14	233	1032.64	1165	1568.02	1165	3893.14	1165	4576.02	1165	3950.67	1165	5281.17	1165	5151.27	1165	4063.86	1165	4280.97
234	358.402	234	1031.97	1170	1566.16	1170	3885.72	1170	4579.73	1170	3956.24	1170	5281.17	1170	5164.26	1170	4058.3	1170	4293.96
235	357.659	235	1031.44	1175	1564.31	1175	3880.15	1175	4590.87	1175	3969.23	1175	5277.46	1175	5171.68	1175	4060.15	1175	4312.52
236	356.912	236	1031.07	1180	1560.6	1180	3878.3	1180	4602	1180	3987.78	1180	5275.6	1180	5180.96	1180	4063.86	1180	4321.8
237	356.162	237	1030.84	1185	1555.03	1185	3878.3	1185	4611.28	1185	4017.47	1185	5277.46	1185	5188.38	1185	4067.57	1185	4327.37
238	355.409	238	1030.77	1190	1555.03	1190	3883.87	1190	4620.56	1190	4045.31	1190	5281.17	1190	5195.81	1190	4069.43	1190	4336.64
239	354.653	239	1030.85	1195	1553.18	1195	3887.58	1195	4629.84	1195	4071.29	1195	5290.45	1195	5199.52	1195	4073.14	1195	4338.5
240	353.895	240	1031.08	1200	1549.46	1200	3889.43	1200	4637.26	1200	4093.55	1200	5299.72	1200	5210.65	1200	4073.14	1200	4340.35
241	353.136	241	1031.47	1205	1543.9	1205	3895	1205	4644.68	1205	4115.82	1205	5303.43	1205	5219.93	1205	4076.85	1205	4344.07
242	352.377	242	1032.01	1210	1536.47	1210	3898.71	1210	4652.1	1210	4134.38	1210	5310.86	1210	5227.35	1210	4080.56	1210	4353.34
243	351.617	243	1032.7	1215	1534.62	1215	3900.57	1215	4655.81	1215	4147.37	1215	5316.42	1215	5240.34	1215	4086.13	1215	4362.62
244	350.858	244	1033.55	1220	1527.2	1220	3900.57	1220	4657.67	1220	4160.36	1220	5321.99	1220	5245.91	1220	4091.7	1220	4379.32
245	350.1	245	1034.56	1225	1521.63	1225	3902.42	1225	4657.67	1225	4165.92	1225	5323.85	1225	5249.62	1225	4095.41	1225	4384.89
246	349.344	246	1035.72	1230	1521.63	1230	3902.42	1230	4653.96	1230	4167.78	1230	5321.99	1230	5251.48	1230	4097.27	1230	4390.46
247	348.59	247	1037.03	1235	1517.92	1235	3900.57	1235	4652.1	1235	4169.64	1235	5320.14	1235	5258.9	1235	4093.55	1235	4396.02
248	347.838	248	1038.5	1240	1517.92	1240	3898.71	1240	4648.39	1240	4167.78	1240	5320.14	1240	5260.76	1240	4086.13	1240	4392.31
249	347.09	249	1040.13	1245	1519.77	1245	3893.14	1245	4646.54	1245	4164.07	1245	5321.99	1245	5270.03	1245	4086.13	1245	4396.02
250	346.346	250	1041.91	1250	1521.63	1250	3887.58	1250	4637.26	1250	4152.93	1250	5325.7	1250	5271.89	1250	4086.13	1250	4397.88
251	345.607	251	1043.85	1255	1521.63	1255	3883.87	1255	4631.69	1255	4143.66	1255	5329.41	1255	5283.02	1255	4089.84	1255	4392.31
252	344.873	252	1045.94	1260	1519.77	1260	3878.3	1260	4631.69	1260	4138.09	1260	5334.98	1260	5292.3	1260	4102.83	1260	4392.31
253	344.144	253	1048.18	1265	1521.63	1265	3876.44	1265	4637.26	1265	4130.67	1265	5340.55	1265	5299.72	1265	4115.82	1265	4397.88
254	343.421	254	1050.58	1270	1521.63	1270	3876.44	1270	4646.54	1270	4119.53	1270	5346.11	1270	5305.29	1270	4126.96	1270	4397.88
255	342.705	255	1053.13	1275	1521.63	1275	3876.44	1275	4655.81	1275	4110.25	1275	5355.39	1275	5318.28	1275	4145.51	1275	4401.59
256	341.996	256	1055.82	1280	1523.48	1280	3874.59	1280	4666.95	1280	4095.41	1280	5362.82	1280	5318.28	1280	4160.36	1280	4409.01
257	341.295	257	1058.67	1285	1517.92	1285	3870.88	1285	4672.52	1285	4078.71	1285	5373.95	1285	5323.85	1285	4178.91	1285	4427.57
258	340.602	258	1061.67	1290	1517.92	1290	3865.31	1290	4676.23	1290	4069.43	1290	5377.66	1290	5331.27	1290	4191.9	1290	4442.42
259	339.918	259	1064.81	1295	1516.06	1295	3854.18	1295	4678.08	1295	4062.01	1295	5388.79	1295	5336.84	1295	4208.6	1295	4460.97
260	339.244	260	1068.1	1300	1517.92	1300	3844.9	1300	4679.94	1300	4056.44	1300	5399.93	1300	5342.4	1300	4227.16	1300	4481.38
261	338.579	261	1071.53	1305	1517.92	1305	3835.62	1305	4683.65	1305	4045.31	1305	5411.06	1305	5349.83	1305	4236.44	1305	4499.94
262	337.924	262	1075.11	1310	1519.77	1310	3828.2	1310	4681.79	1310	4030.46	1310	5414.77	1310	5351.68	1310	4243.86	1310	4511.07
263	337.28	263	1078.83	1315	1523.48	1315	3820.77	1315	4676.23	1315	4002.63	1315	5418.48	1315	5359.1	1315	4255	1315	4527.78
264	336.648	264	1082.69	1320	1527.2	1320	3815.21	1320	4674.37	1320	3980.36	1320	5422.2	1320	5364.67	1320	4260.56	1320	4538.91
265	336.027	265	1086.68	1325	1532.76	1325	3807.78	1325	4666.95	1325	3976.65	1325	5424.05	1325	5366.53	1325	4267.98	1325	4551.9
266	335.418	266	1090.82	1330	1536.47	1330	3804.07	1330	4663.24	1330	3989.64	1330	5431.47	1330	5373.95	1330	4286.54	1330	4559.32
267	334.822	267	1095.08	1335	1540.19	1335	3804.07	1335	4653.96	1335	4024.9	1335	5437.04	1335	5375.81	1335	4314.38	1335	4563.03
268	334.239	268	1099.48	1340	1542.04	1340	3804.07	1340	4646.54	1340	4067.57	1340	5440.75	1340	5385.08	1340	4321.8	1340	4566.74
269	333.669	269	1104.01	1345	1547.61	1345	3802.22	1345	4642.83	1345	4119.53	1345	5444.46	1345	5390.65	1345	4329.22	1345	4568.6
270	333.114	270	1108.66	1350	1553.18	1350	3802.22	1350	4640.97	1350	4165.92	1350	5448.18	1350	5394.36	1350	4338.5	1350	4574.17
271	332.573	271	1113.44	1355	1556.89	1355	3800.36	1355	4635.4	1355	4206.75	1355	5450.03	1355	5401.78	1355	4345.92	1355	4576.02
272	332.046	272	1118.35	1360	1558.74	1360	3798.51	1360	4637.26	1360	4238.29	1360	5451.89	1360	5407.35	1360	4353.34	1360	4583.44
273	331.535	273	1123.37	1365	1562.45	1365	3794.8	1365	4637.26	1365	4262.42	1365	5451.89	1365	5409.21	1365	4357.06	1365	4592.72
274	331.039	274	1128.51	1370	1566.16	1370	3791.08	1370	4639.11	1370	4279.12	1370	5451.89	1370	5418.48	1370	4360.77	1370	4594.58
275	330.559	275	1133.76	1375	1566.16	1375	3783.66	1375	4642.83	1375	4299.53	1375	5453.74	1375	5425.91	1375	4371.9	1375	4603.86
276	330.095	276	1139.13	1380	1566.16	1380	3779.95	1380	4642.83	1380	4321.8	1380	5457.45	1380	5429.62	1380	4383.03	1380	4611.28
277	329.648	277	1144.61	1385	1566.16	1385	3772.53	1385	4644.68	1385	4338.5	1385	5461.16	1385	5437.04	1385	4384.89	1385	4620.56
278	329.218	278	1150.2	1390	1568.02	1390	3770.67	1390	4648.39	1390	4355.2	1390	5466.73	1390	5442.61	1390	4394.17	1390	4626.12
279	328.806	279	1155.88	1395	1566.16	1395	3770.67	1395	4652.1	1395	4364.48	1395	5476.01	1395	5451.89	1395	4403.45	1395	4635.4
280	328.411	280	1161.67	1400	1562.45	1400	3770.67	1400	4653.96	1400	4373.76	1400	5483.43	1400	5459.31	1400	4410.87	1400	4642.83
281	328.034	281	1167.56	1405	1556.89	1405	3770.67	1405	4659.53	1405	4384.89	1405	5487.14	1405	5468.59	1405	4414.58	1405	4644.68
282	327.675	282	1173.54	1410	1551.32	1410	3772.53	1410	4663.24	1410	4392.31	1410	5487.14	1410	5477.87	1410	4412.73	1410	4648.39
283	327.335	283	1179.61	1415	1543.9	1415	3772.53	1415	4668.8	1415	4401.59	1415	5490.86	1415	5485.29	1415	4410.87	1415	4652.1
284	327.014	284	1185.78	1420	1538.33	1420	3776.24	1420	4672.52	1420	4414.58	1420	5489	1420	5494.57	1420	4420.15	1420	4652.1
285	326.712	285	1192.02	1425	1530.91	1425	3779.95	1425	4678.08	1425	4422	1425	5489	1425	5507.56	1425	4429.43	1425	4665.09
286	326.429	286	1198.35	1430	1525.34	1430	3789.23	1430	4689.22	1430	4429.43	1430	5487.14	1430	5520.55	1430	4436.85	1430	4670.66
287	326.166	287	1204.76	1435	1519.77	1435	3796.65	1435	4696.64	1435	4429.43	1435	5489	1435	5527.97	1435	4451.69	1435	4674.37
288	325.923	288	1211.24	1440	1516.06	1440	3811.5	1440	4702.21	1440	4436.85	1440	5490.86	1440	5539.1	1440	4462.83	1440	4685.5
289	325.701	289	1217.8	1445	1516.06	1445	3822.63	1445	4707.77	1445	4436.85	1445	5500.13	1445	5553.95	1445	4475.82	1445	4700.35
290	325.498	290	1224.42	1450	1516.06	1450	3831.91	1450	4707.77	1450	4442.42	1450	5503.84	1450	5552.09	1450	4481.38	1450	4709.63
291	325.316	291	1231.11	1455	1517.92	1455	3835.62	1455	4707.77	1455	4447.98	1455	5501.99	1455	5561.37	1455	4488.81	1455	4724.47
292	325.155	292	1237.85	1460	1523.48	1460	3841.19	1460	4704.06	1460	4455.4	1460	5505.7	1460	5570.65	1460	4492.52	1460	4728.18
293	325.016	293	1244.66	1465	1527.2	1465	3846.75	1465	4704.06	1465	4462.83	1465	5507.56	1465	5572.5	1465	4498.08	1465	4743.03
294	324.897	294	1251.52	1470	1529.05	1470	3850.46	1470	4700.35	1470	4466.54	1470	5509.41	1470	5583.64	1470	4501.8	1470	4754.16
295	324.8	295	1258.43	1475	1530.91	1475	3854.18	1475	4702.21	1475	4479.53	1475	5514.98	1475	5591.06	1475	4509.22	1475	4757.88
296	324.724	296	1265.39	1480	1532.76	1480	3859.74	1480	4704.06	1480	4494.37	1480	5518.69	1480	5596.63	1480	4511.07	1480	4769.01
297	324.67	297	1272.39	1485	1534.62	1485	3861.6	1485	4704.06	1485	4505.51	1485	5526.11	1485	5594.77	1485	4512.93	1485	4778.29
298	324.638	298	1279.43	1490	1534.62	1490	3867.17	1490	4705.92	1490	4516.64	1490	5526.11	1490	5596.63	1490	4516.64	1490	4787.57
299	324.627	299	1286.5	1495	1534.62	1495	3870.88	1495	4709.63	1495	4538.91	1495	5529.82	1495	5591.06	1495	4516.64	1495	4796.84
300	324.639	300	1293.61	1500	1534.62	1500	3874.59	1500	4713.34	1500	4557.47	1500	5529.82	1500	5589.2	1500	4514.79	1500	4802.41
301	324.673	301	1300.75	1505	1538.33	1505	3874.59	1505	4717.05	1505	4574.17	1505	5529.82	1505	5587.35	1505	4520.35	1505	4806.12
302	324.73	302	1307.91	1510	1545.75	1510	3876.44	1510	4720.76	1510	4583.44	1510	5533.53	1510	5587.35	1510	4525.92	1510	4813.54
303	324.809	303	1315.09	1515	1560.6	1515	3878.3	1515	4724.47	1515	4590.87	1515	5535.39	1515	5587.35	1515	4533.34	1515	4819.11
304	324.91	304	1322.28	1520	1562.45	1520	3882.01	1520	4728.18	1520	4594.58	1520	5539.1	1520	5589.2	1520	4537.05	1520	4830.25
305	325.034	305	1329.49	1525	1562.45	1525	3882.01	1525	4730.04	1525	4600.15	1525	5548.38	1525	5591.06	1525	4544.48	1525	4839.52
306	325.18	306	1336.71	1530	1568.02	1530	3882.01	1530	4733.75	1530	4600.15	1530	5552.09	1530	5598.48	1530	4548.19	1530	4850.66
307	325.35	307	1343.94	1535	1579.15	1535	3883.87	1535	4737.46	1535	4596.43	1535	5552.09	1535	5602.19	1535	4555.61	1535	4859.94
308	325.542	308	1351.17	1540	1586.58	1540	3885.72	1540	4739.32	1540	4589.01	1540	5555.8	1540	5607.76	1540	4561.18	1540	4871.07
309	325.757	309	1358.39	1545	1592.14	1545	3885.72	1545	4741.17	1545	4589.01	1545	5559.51	1545	5607.76	1545	4570.45	1545	4871.07
310	325.994	310	1365.61	1550	1597.71	1550	3887.58	1550	4743.03	1550	4583.44	1550	5563.23	1550	5611.47	1550	4572.31	1550	4884.06
311	326.255	311	1372.82	1555	1603.28	1555	3885.72	1555	4744.89	1555	4583.44	1555	5568.79	1555	5615.18	1555	4579.73	1555	4893.34
312	326.538	312	1380.02	1560	1612.56	1560	3887.58	1560	4748.6	1560	4579.73	1560	5572.5	1560	5617.04	1560	4583.44	1560	4904.47
313	326.844	313	1387.2	1565	1616.27	1565	3887.58	1565	4748.6	1565	4579.73	1565	5578.07	1565	5617.04	1565	4589.01	1565	4913.75
314	327.173	314	1394.36	1570	1623.69	1570	3891.29	1570	4752.31	1570	4577.88	1570	5578.07	1570	5620.75	1570	4589.01	1570	4921.17
315	327.525	315	1401.49	1575	1631.11	1575	3893.14	1575	4757.88	1575	4574.17	1575	5581.78	1575	5622.61	1575	4596.43	1575	4926.74
316	327.899	316	1408.6	1580	1636.68	1580	3895	1580	4759.73	1580	4574.17	1580	5585.49	1580	5626.32	1580	4598.29	1580	4934.16
317	328.296	317	1415.68	1585	1638.53	1585	3895	1585	4763.44	1585	4574.17	1585	5587.35	1585	5626.32	1585	4600.15	1585	4943.44
318	328.716	318	1422.72	1590	1638.53	1590	3893.14	1590	4763.44	1590	4568.6	1590	5592.92	1590	5628.17	1590	4598.29	1590	4949.01
319	329.159	319	1429.72	1595	1644.1	1595	3889.43	1595	4767.15	1595	4564.89	1595	5592.92	1595	5630.03	1595	4598.29	1595	4954.57
320	329.624	320	1436.68	1600	1644.1	1600	3885.72	1600	4765.3	1600	4553.75	1600	5594.77	1600	5631.88	1600	4596.43	1600	4960.14
321	330.112	321	1443.6	1605	1651.52	1605	3882.01	1605	4765.3	1605	4542.62	1605	5602.19	1605	5630.03	1605	4596.43	1605	4962
322	330.622	322	1450.46	1610	1655.24	1610	3882.01	1610	4765.3	1610	4533.34	1610	5604.05	1610	5635.6	1610	4596.43	1610	4962
323	331.154	323	1457.28	1615	1658.95	1615	3880.15	1615	4761.59	1615	4529.63	1615	5607.76	1615	5635.6	1615	4600.15	1615	4973.13
324	331.709	324	1464.03	1620	1664.51	1620	3880.15	1620	4761.59	1620	4518.5	1620	5611.47	1620	5641.16	1620	4607.57	1620	4974.99
325	332.285	325	1470.73	1625	1668.23	1625	3882.01	1625	4761.59	1625	4512.93	1625	5615.18	1625	5644.87	1625	4611.28	1625	4982.41
326	332.884	326	1477.37	1630	1675.65	1630	3883.87	1630	4756.02	1630	4507.36	1630	5618.89	1630	5646.73	1630	4616.85	1630	4989.83
327	333.505	327	1483.94	1635	1681.21	1635	3887.58	1635	4754.16	1635	4498.08	1635	5622.61	1635	5652.3	1635	4627.98	1635	4989.83
328	334.147	328	1490.44	1640	1686.78	1640	3889.43	1640	4754.16	1640	4490.66	1640	5630.03	1640	5656.01	1640	4635.4	1640	4991.69
329	334.811	329	1496.87	1645	1690.49	1645	3891.29	1645	4754.16	1645	4477.67	1645	5635.6	1645	5667.14	1645	4640.97	1645	4989.83
330	335.497	330	1503.22	1650	1692.35	1650	3893.14	1650	4754.16	1650	4477.67	1650	5635.6	1650	5669	1650	4639.11	1650	4989.83
331	336.204	331	1509.5	1655	1697.92	1655	3900.57	1655	4756.02	1655	4488.81	1655	5641.16	1655	5663.43	1655	4635.4	1655	4987.98
332	336.932	332	1515.69	1660	1701.63	1660	3904.28	1660	4763.44	1660	4514.79	1660	5644.87	1660	5665.29	1660	4629.84	1660	4991.69
333	337.681	333	1521.8	1665	1703.48	1665	3906.13	1665	4770.86	1665	4538.91	1665	5648.58	1665	5667.14	1665	4624.27	1665	4993.54
334	338.451	334	1527.83	1670	1703.48	1670	3906.13	1670	4776.43	1670	4561.18	1670	5650.44	1670	5672.71	1670	4627.98	1670	4997.25
335	339.241	335	1533.76	1675	1699.77	1675	3907.99	1675	4783.85	1675	4572.31	1675	5656.01	1675	5676.42	1675	4629.84	1675	5002.82
336	340.052	336	1539.6	1680	1701.63	1680	3904.28	1680	4789.42	1680	4583.44	1680	5657.86	1680	5676.42	1680	4633.55	1680	5015.81
337	340.884	337	1545.34	1685	1703.48	1685	3904.28	1685	4793.13	1685	4596.43	1685	5661.57	1685	5678.28	1685	4644.68	1685	5021.38
338	341.735	338	1550.99	1690	1710.91	1690	3906.13	1690	4794.99	1690	4605.71	1690	5661.57	1690	5680.13	1690	4650.25	1690	5021.38
339	342.607	339	1556.54	1695	1710.91	1695	3904.28	1695	4796.84	1695	4613.13	1695	5667.14	1695	5680.13	1695	4644.68	1695	5028.8
340	343.498	340	1561.98	1700	1707.19	1700	3906.13	1700	4798.7	1700	4618.7	1700	5669	1700	5680.13	1700	4650.25	1700	5032.51
341	344.408	341	1567.32	1705	1696.06	1705	3906.13	1705	4798.7	1705	4614.99	1705	5672.71	1705	5680.13	1705	4648.39	1705	5036.22
342	345.338	342	1572.55	1710	1684.93	1710	3904.28	1710	4798.7	1710	4603.86	1710	5678.28	1710	5672.71	1710	4646.54	1710	5041.79
343	346.287	343	1577.67	1715	1675.65	1715	3902.42	1715	4800.55	1715	4589.01	1715	5680.13	1715	5672.71	1715	4644.68	1715	5054.78
344	347.255	344	1582.68	1720	1662.66	1720	3898.71	1720	4798.7	1720	4570.45	1720	5685.7	1720	5676.42	1720	4639.11	1720	5060.35
345	348.241	345	1587.57	1725	1655.24	1725	3893.14	1725	4800.55	1725	4548.19	1725	5691.26	1725	5680.13	1725	4637.26	1725	5067.77
346	349.245	346	1592.35	1730	1649.67	1730	3889.43	1730	4800.55	1730	4516.64	1730	5693.12	1730	5683.84	1730	4637.26	1730	5078.9
347	350.268	347	1597	1735	1642.25	1735	3885.72	1735	4804.27	1735	4481.38	1735	5696.83	1735	5683.84	1735	4635.4	1735	5091.89
348	351.308	348	1601.54	1740	1640.39	1740	3885.72	1740	4804.27	1740	4444.27	1740	5700.54	1740	5687.55	1740	4635.4	1740	5101.17
349	352.366	349	1605.95	1745	1640.39	1745	3885.72	1745	4802.41	1745	4414.58	1745	5704.25	1745	5687.55	1745	4640.97	1745	5103.03
350	353.441	350	1610.25	1750	1640.39	1750	3883.87	1750	4806.12	1750	4396.02	1750	5706.11	1750	5693.12	1750	4650.25	1750	5104.88
351	354.533	351	1614.41	1755	1642.25	1755	3885.72	1755	4804.27	1755	4383.03	1755	5711.68	1755	5698.69	1755	4652.1	1755	5110.45
352	355.642	352	1618.45	1760	1645.96	1760	3882.01	1760	4800.55	1760	4383.03	1760	5709.82	1760	5700.54	1760	4657.67	1760	5114.16
353	356.767	353	1622.36	1765	1653.38	1765	3887.58	1765	4798.7	1765	4386.75	1765	5711.68	1765	5698.69	1765	4661.38	1765	5116.01
354	357.908	354	1626.13	1770	1664.51	1770	3891.29	1770	4800.55	1770	4396.02	1770	5713.53	1770	5700.54	1770	4663.24	1770	5125.29
355	359.065	355	1629.78	1775	1673.79	1775	3891.29	1775	4807.98	1775	4397.88	1775	5717.24	1775	5704.25	1775	4670.66	1775	5130.86
356	360.238	356	1633.29	1780	1679.36	1780	3896.86	1780	4815.4	1780	4399.74	1780	5719.1	1780	5709.82	1780	4678.08	1780	5134.57
357	361.426	357	1636.67	1785	1688.64	1785	3900.57	1785	4819.11	1785	4396.02	1785	5722.81	1785	5711.68	1785	4683.65	1785	5141.99
358	362.629	358	1639.91	1790	1694.2	1790	3907.99	1790	4826.53	1790	4390.46	1790	5724.67	1790	5715.39	1790	4687.36	1790	5149.42
359	363.846	359	1643.02	1795	1697.92	1795	3904.28	1795	4833.96	1795	4381.18	1795	5722.81	1795	5720.96	1795	4696.64	1795	5145.7
360	365.078	360	1645.99	1800	1703.48	1800	3902.42	1800	4835.81	1800	4384.89	1800	5724.67	1800	5726.52	1800	4702.21	1800	5156.84
361	366.324	361	1648.82	1805	1705.34	1805	3900.57	1805	4843.23	1805	4392.31	1805	5726.52	1805	5732.09	1805	4713.34	1805	5162.41
362	367.583	362	1651.51	1810	1710.91	1810	3900.57	1810	4848.8	1810	4390.46	1810	5728.38	1810	5741.37	1810	4715.2	1810	5164.26
363	368.856	363	1654.06	1815	1716.47	1815	3896.86	1815	4852.51	1815	4390.46	1815	5730.23	1815	5743.22	1815	4724.47	1815	5169.83
364	370.142	364	1656.47	1820	1716.47	1820	3895	1820	4856.22	1820	4397.88	1820	5732.09	1820	5752.5	1820	4731.9	1820	5180.96
365	371.44	365	1658.74	1825	1720.18	1825	3893.14	1825	4854.37	1825	4405.3	1825	5732.09	1825	5758.07	1825	4741.17	1825	5188.38
366	372.751	366	1660.87	1830	1720.18	1830	3893.14	1830	4850.66	1830	4416.44	1830	5733.94	1830	5756.21	1830	4748.6	1830	5199.52
367	374.074	367	1662.86	1835	1718.33	1835	3887.58	1835	4848.8	1835	4431.28	1835	5733.94	1835	5763.63	1835	4756.02	1835	5206.94
368	375.409	368	1664.7	1840	1710.91	1840	3887.58	1840	4846.95	1840	4444.27	1840	5735.8	1840	5771.06	1840	4763.44	1840	5212.51
369	376.755	369	1666.4	1845	1701.63	1845	3883.87	1845	4846.95	1845	4460.97	1845	5737.66	1845	5780.34	1845	4769.01	1845	5223.64
370	378.111	370	1667.96	1850	1694.2	1850	3880.15	1850	4843.23	1850	4470.25	1850	5741.37	1850	5785.9	1850	4776.43	1850	5219.93
371	379.479	371	1669.38	1855	1686.78	1855	3878.3	1855	4841.38	1855	4475.82	1855	5743.22	1855	5795.18	1855	4783.85	1855	5227.35
372	380.856	372	1670.65	1860	1681.21	1860	3876.44	1860	4833.96	1860	4485.1	1860	5741.37	1860	5802.6	1860	4793.13	1860	5231.06
373	382.244	373	1671.78	1865	1677.5	1865	3874.59	1865	4830.25	1865	4498.08	1865	5743.22	1865	5813.74	1865	4802.41	1865	5238.49
374	383.641	374	1672.77	1870	1673.79	1870	3872.73	1870	4828.39	1870	4511.07	1870	5745.08	1870	5819.3	1870	4813.54	1870	5238.49
375	385.047	375	1673.62	1875	1673.79	1875	3874.59	1875	4824.68	1875	4527.78	1875	5746.93	1875	5821.16	1875	4819.11	1875	5247.77
376	386.462	376	1674.32	1880	1673.79	1880	3876.44	1880	4815.4	1880	4542.62	1880	5746.93	1880	5826.73	1880	4826.53	1880	5253.33
377	387.886	377	1674.89	1885	1679.36	1885	3872.73	1885	4811.69	1885	4551.9	1885	5750.65	1885	5828.58	1885	4832.1	1885	5264.47
378	389.317	378	1675.31	1890	1686.78	1890	3870.88	1890	4809.83	1890	4561.18	1890	5752.5	1890	5830.44	1890	4833.96	1890	5271.89
379	390.756	379	1675.59	1895	1692.35	1895	3867.17	1895	4802.41	1895	4568.6	1895	5748.79	1895	5836.01	1895	4835.81	1895	5281.17
380	392.203	380	1675.73	1900	1684.93	1900	3869.02	1900	4804.27	1900	4572.31	1900	5750.65	1900	5839.72	1900	4839.52	1900	5283.02
381	393.656	381	1675.74	1905	1681.21	1905	3870.88	1905	4806.12	1905	4570.45	1905	5750.65	1905	5845.28	1905	4845.09	1905	5288.59
382	395.116	382	1675.6	1910	1684.93	1910	3870.88	1910	4809.83	1910	4563.03	1910	5746.93	1910	5847.14	1910	4848.8	1910	5294.16
383	396.582	383	1675.33	1915	1686.78	1915	3869.02	1915	4813.54	1915	4559.32	1915	5748.79	1915	5848.99	1915	4854.37	1915	5303.43
384	398.054	384	1674.93	1920	1686.78	1920	3870.88	1920	4815.4	1920	4564.89	1920	5746.93	1920	5848.99	1920	4852.51	1920	5303.43
385	399.531	385	1674.38	1925	1686.78	1925	3872.73	1925	4817.26	1925	4563.03	1925	5746.93	1925	5852.71	1925	4852.51	1925	5309
386	401.013	386	1673.71	1930	1686.78	1930	3870.88	1930	4815.4	1930	4566.74	1930	5746.93	1930	5852.71	1930	4859.94	1930	5310.86
387	402.499	387	1672.9	1935	1688.64	1935	3870.88	1935	4813.54	1935	4563.03	1935	5746.93	1935	5854.56	1935	4863.65	1935	5316.42
388	403.99	388	1671.96	1940	1688.64	1940	3867.17	1940	4807.98	1940	4563.03	1940	5748.79	1940	5858.27	1940	4865.5	1940	5316.42
389	405.485	389	1670.89	1945	1690.49	1945	3865.31	1945	4806.12	1945	4557.47	1945	5748.79	1945	5860.13	1945	4869.21	1945	5321.99
390	406.983	390	1669.69	1950	1690.49	1950	3861.6	1950	4804.27	1950	4551.9	1950	5746.93	1950	5863.84	1950	4874.78	1950	5336.84
391	408.484	391	1668.36	1955	1690.49	1955	3861.6	1955	4802.41	1955	4550.04	1955	5752.5	1955	5867.55	1955	4874.78	1955	5334.98
392	409.987	392	1666.91	1960	1688.64	1960	3859.74	1960	4804.27	1960	4542.62	1960	5752.5	1960	5867.55	1960	4880.35	1960	5334.98
393	411.493	393	1665.34	1965	1688.64	1965	3857.89	1965	4802.41	1965	4533.34	1965	5752.5	1965	5874.97	1965	4885.91	1965	5336.84
394	413	394	1663.64	1970	1686.78	1970	3856.03	1970	4807.98	1970	4529.63	1970	5752.5	1970	5876.83	1970	4885.91	1970	5346.11
395	414.509	395	1661.82	1975	1684.93	1975	3852.32	1975	4811.69	1975	4527.78	1975	5754.36	1975	5886.11	1975	4893.34	1975	5349.83
396	416.019	396	1659.88	1980	1681.21	1980	3852.32	1980	4813.54	1980	4535.2	1980	5758.07	1980	5889.82	1980	4895.19	1980	5355.39
397	417.529	397	1657.83	1985	1677.5	1985	3850.46	1985	4819.11	1985	4546.33	1985	5756.21	1985	5893.53	1985	4898.9	1985	5355.39
398	419.039	398	1655.66	1990	1675.65	1990	3844.9	1990	4824.68	1990	4559.32	1990	5758.07	1990	5895.39	1990	4897.05	1990	5366.53
399	420.55	399	1653.38	1995	1675.65	1995	3843.04	1995	4826.53	1995	4572.31	1995	5759.92	1995	5897.24	1995	4898.9	1995	5370.24
400	422.059	400	1650.98	2000	1670.08	2000	3843.04	2000	4830.25	2000	4587.16	2000	5763.63	2000	5899.1	2000	4902.62	2000	5381.37
401	423.568	401	1648.48	2005	1670.08	2005	3844.9	2005	4833.96	2005	4600.15	2005	5759.92	2005	5902.81	2005	4906.33	2005	5385.08
402	425.074	402	1645.87	2010	1668.23	2010	3844.9	2010	4837.67	2010	4607.57	2010	5763.63	2010	5908.38	2010	4906.33	2010	5386.94
403	426.579	403	1643.15	2015	1664.51	2015	3841.19	2015	4843.23	2015	4613.13	2015	5769.2	2015	5912.09	2015	4910.04	2015	5388.79
404	428.082	404	1640.34	2020	1664.51	2020	3841.19	2020	4845.09	2020	4618.7	2020	5767.35	2020	5919.51	2020	4917.46	2020	5390.65
405	429.582	405	1637.42	2025	1662.66	2025	3844.9	2025	4848.8	2025	4618.7	2025	5774.77	2025	5923.22	2025	4921.17	2025	5398.07
406	431.079	406	1634.41	2030	1658.95	2030	3848.61	2030	4854.37	2030	4620.56	2030	5772.91	2030	5926.93	2030	4921.17	2030	5401.78
407	432.572	407	1631.3	2035	1658.95	2035	3852.32	2035	4856.22	2035	4622.41	2035	5776.62	2035	5928.79	2035	4921.17	2035	5405.5
408	434.061	408	1628.09	2040	1655.24	2040	3856.03	2040	4858.08	2040	4622.41	2040	5778.48	2040	5932.5	2040	4923.03	2040	5403.64
409	435.546	409	1624.8	2045	1649.67	2045	3857.89	2045	4863.65	2045	4624.27	2045	5782.19	2045	5934.35	2045	4926.74	2045	5407.35
410	437.026	410	1621.42	2050	1645.96	2050	3857.89	2050	4867.36	2050	4622.41	2050	5782.19	2050	5934.35	2050	4923.03	2050	5407.35
411	438.501	411	1617.95	2055	1644.1	2055	3844.9	2055	4869.21	2055	4618.7	2055	5782.19	2055	5939.92	2055	4924.88	2055	5405.5
412	439.971	412	1614.4	2060	1642.25	2060	3824.49	2060	4867.36	2060	4616.85	2060	5785.9	2060	5947.34	2060	4926.74	2060	5414.77
413	441.434	413	1610.77	2065	1644.1	2065	3804.07	2065	4869.21	2065	4613.13	2065	5785.9	2065	5951.06	2065	4928.59	2065	5418.48
414	442.891	414	1607.06	2070	1645.96	2070	3792.94	2070	4867.36	2070	4611.28	2070	5787.76	2070	5952.91	2070	4930.45	2070	5420.34
415	444.34	415	1603.28	2075	1647.81	2075	3800.36	2075	4869.21	2075	4611.28	2075	5789.61	2075	5954.77	2075	4928.59	2075	5427.76
416	445.783	416	1599.43	2080	1649.67	2080	3811.5	2080	4867.36	2080	4618.7	2080	5791.47	2080	5958.48	2080	4923.03	2080	5431.47
417	447.218	417	1595.5	2085	1645.96	2085	3830.05	2085	4869.21	2085	4626.12	2085	5791.47	2085	5960.33	2085	4923.03	2085	5440.75
418	448.645	418	1591.51	2090	1644.1	2090	3844.9	2090	4865.5	2090	4631.69	2090	5791.47	2090	5967.76	2090	4921.17	2090	5442.61
419	450.064	419	1587.46	2095	1642.25	2095	3856.03	2095	4863.65	2095	4646.54	2095	5791.47	2095	5977.03	2095	4921.17	2095	5446.32
420	451.473	420	1583.34	2100	1640.39	2100	3857.89	2100	4863.65	2100	4661.38	2100	5797.04	2100	5975.18	2100	4924.88	2100	5444.46
421	452.873	421	1579.17	2105	1642.25	2105	3857.89	2105	4863.65	2105	4674.37	2105	5798.89	2105	5977.03	2105	4919.32	2105	5451.89
422	454.264	422	1574.94	2110	1645.96	2110	3857.89	2110	4859.94	2110	4679.94	2110	5798.89	2110	5980.75	2110	4923.03	2110	5455.6
423	455.645	423	1570.66	2115	1655.24	2115	3857.89	2115	4858.08	2115	4683.65	2115	5800.75	2115	5978.89	2115	4926.74	2115	5461.16
424	457.015	424	1566.33	2120	1662.66	2120	3856.03	2120	4854.37	2120	4689.22	2120	5800.75	2120	5980.75	2120	4928.59	2120	5464.88
425	458.374	425	1561.95	2125	1668.23	2125	3854.18	2125	4848.8	2125	4689.22	2125	5800.75	2125	5978.89	2125	4932.31	2125	5466.73
426	459.722	426	1557.53	2130	1668.23	2130	3848.61	2130	4841.38	2130	4696.64	2130	5797.04	2130	5982.6	2130	4936.02	2130	5470.44
427	461.058	427	1553.07	2135	1664.51	2135	3843.04	2135	4835.81	2135	4711.48	2135	5802.6	2135	5984.46	2135	4939.73	2135	5470.44
428	462.382	428	1548.57	2140	1658.95	2140	3837.47	2140	4832.1	2140	4735.61	2140	5798.89	2140	5986.31	2140	4943.44	2140	5470.44
429	463.694	429	1544.04	2145	1658.95	2145	3833.76	2145	4824.68	2145	4761.59	2145	5791.47	2145	5986.31	2145	4943.44	2145	5472.3
430	464.992	430	1539.47	2150	1662.66	2150	3831.91	2150	4822.82	2150	4787.57	2150	5793.33	2150	5986.31	2150	4947.15	2150	5474.15
431	466.278	431	1534.88	2155	1668.23	2155	3828.2	2155	4820.97	2155	4813.54	2155	5793.33	2155	5984.46	2155	4952.72	2155	5483.43
432	467.55	432	1530.26	2160	1671.94	2160	3826.34	2160	4820.97	2160	4832.1	2160	5789.61	2160	5982.6	2160	4956.43	2160	5487.14
433	468.808	433	1525.61	2165	1675.65	2165	3826.34	2165	4822.82	2165	4846.95	2165	5789.61	2165	5982.6	2165	4962	2165	5489
434	470.052	434	1520.95	2170	1677.5	2170	3826.34	2170	4824.68	2170	4859.94	2170	5793.33	2170	5982.6	2170	4967.56	2170	5492.71
435	471.281	435	1516.27	2175	1677.5	2175	3828.2	2175	4826.53	2175	4867.36	2175	5798.89	2175	5975.18	2175	4976.84	2175	5494.57
436	472.494	436	1511.58	2180	1673.79	2180	3828.2	2180	4830.25	2180	4865.5	2180	5802.6	2180	5977.03	2180	4984.26	2180	5496.42
437	473.693	437	1506.87	2185	1668.23	2185	3830.05	2185	4832.1	2185	4852.51	2185	5804.46	2185	5978.89	2185	4989.83	2185	5496.42
438	474.875	438	1502.16	2190	1670.08	2190	3830.05	2190	4833.96	2190	4835.81	2190	5804.46	2190	5980.75	2190	4989.83	2190	5498.28
439	476.041	439	1497.44	2195	1677.5	2195	3833.76	2195	4833.96	2195	4815.4	2195	5804.46	2195	5980.75	2195	4995.4	2195	5496.42
440	477.191	440	1492.72	2200	1684.93	2200	3833.76	2200	4835.81	2200	4789.42	2200	5802.6	2200	5978.89	2200	4999.11	2200	5498.28
441	478.324	441	1488	2205	1694.2	2205	3833.76	2205	4839.52	2205	4757.88	2205	5802.6	2205	5980.75	2205	5006.53	2205	5496.42
442	479.439	442	1483.28	2210	1701.63	2210	3835.62	2210	4839.52	2210	4730.04	2210	5804.46	2210	5982.6	2210	5010.24	2210	5496.42
443	480.537	443	1478.57	2215	1705.34	2215	3839.33	2215	4841.38	2215	4707.77	2215	5808.17	2215	5980.75	2215	5013.95	2215	5494.57
444	481.617	444	1473.87	2220	1707.19	2220	3841.19	2220	4845.09	2220	4687.36	2220	5810.03	2220	5977.03	2220	5019.52	2220	5496.42
445	482.679	445	1469.18	2225	1710.91	2225	3843.04	2225	4839.52	2225	4670.66	2225	5815.59	2225	5980.75	2225	5026.94	2225	5500.13
446	483.721	446	1464.51	2230	1710.91	2230	3844.9	2230	4837.67	2230	4652.1	2230	5817.45	2230	5978.89	2230	5036.22	2230	5505.7
447	484.745	447	1459.85	2235	1710.91	2235	3844.9	2235	4835.81	2235	4646.54	2235	5824.87	2235	5978.89	2235	5043.64	2235	5511.27
448	485.75	448	1455.22	2240	1710.91	2240	3848.61	2240	4833.96	2240	4646.54	2240	5824.87	2240	5977.03	2240	5049.21	2240	5514.98
449	486.735	449	1450.61	2245	1710.91	2245	3850.46	2245	4835.81	2245	4652.1	2245	5826.73	2245	5977.03	2245	5056.63	2245	5520.55
450	487.7	450	1446.02	2250	1705.34	2250	3846.75	2250	4835.81	2250	4652.1	2250	5830.44	2250	5973.32	2250	5062.2	2250	5522.4
451	488.645	451	1441.46	2255	1705.34	2255	3841.19	2255	4837.67	2255	4646.54	2255	5832.29	2255	5973.32	2255	5065.91	2255	5527.97
452	489.57	452	1436.94	2260	1701.63	2260	3839.33	2260	4835.81	2260	4635.4	2260	5832.29	2260	5973.32	2260	5067.77	2260	5527.97
453	490.473	453	1432.45	2265	1699.77	2265	3831.91	2265	4837.67	2265	4622.41	2265	5834.15	2265	5977.03	2265	5075.19	2265	5533.53
454	491.355	454	1427.99	2270	1697.92	2270	3830.05	2270	4835.81	2270	4614.99	2270	5830.44	2270	5977.03	2270	5082.61	2270	5533.53
455	492.216	455	1423.57	2275	1696.06	2275	3830.05	2275	4832.1	2275	4618.7	2275	5824.87	2275	5977.03	2275	5084.47	2275	5531.68
456	493.055	456	1419.2	2280	1696.06	2280	3831.91	2280	4833.96	2280	4627.98	2280	5824.87	2280	5978.89	2280	5090.04	2280	5539.1
457	493.872	457	1414.87	2285	1694.2	2285	3835.62	2285	4833.96	2285	4652.1	2285	5823.02	2285	5982.6	2285	5090.04	2285	5544.67
458	494.667	458	1410.58	2290	1696.06	2290	3843.04	2290	4835.81	2290	4681.79	2290	5819.3	2290	5980.75	2290	5093.75	2290	5546.52
459	495.44	459	1406.35	2295	1694.2	2295	3846.75	2295	4833.96	2295	4720.76	2295	5813.74	2295	5982.6	2295	5099.31	2295	5550.24
460	496.189	460	1402.16	2300	1694.2	2300	3854.18	2300	4833.96	2300	4756.02	2300	5811.88	2300	5978.89	2300	5104.88	2300	5559.51
461	496.915	461	1398.03	2305	1692.35	2305	3859.74	2305	4837.67	2305	4783.85	2305	5808.17	2305	5982.6	2305	5103.03	2305	5563.23
462	497.618	462	1393.95	2310	1692.35	2310	3863.45	2310	4835.81	2310	4800.55	2310	5810.03	2310	5984.46	2310	5121.58	2310	5561.37
463	498.298	463	1389.93	2315	1692.35	2315	3867.17	2315	4833.96	2315	4811.69	2315	5810.03	2315	5984.46	2315	5130.86	2315	5565.08
464	498.953	464	1385.98	2320	1686.78	2320	3870.88	2320	4828.39	2320	4820.97	2320	5810.03	2320	5986.31	2320	5116.01	2320	5570.65
465	499.585	465	1382.08	2325	1684.93	2325	3872.73	2325	4822.82	2325	4828.39	2325	5808.17	2325	5988.17	2325	5108.59	2325	5572.5
466	500.192	466	1378.25	2330	1683.07	2330	3874.59	2330	4817.26	2330	4833.96	2330	5808.17	2330	5988.17	2330	5112.3	2330	5576.21
467	500.775	467	1374.48	2335	1679.36	2335	3878.3	2335	4809.83	2335	4843.23	2335	5810.03	2335	5986.31	2335	5114.16	2335	5578.07
468	501.333	468	1370.78	2340	1679.36	2340	3882.01	2340	4807.98	2340	4858.08	2340	5808.17	2340	5990.02	2340	5114.16	2340	5581.78
469	501.866	469	1367.16	2345	1677.5	2345	3883.87	2345	4807.98	2345	4872.93	2345	5810.03	2345	5986.31	2345	5114.16	2345	5583.64
470	502.374	470	1363.6	2350	1675.65	2350	3882.01	2350	4807.98	2350	4885.91	2350	5811.88	2350	5982.6	2350	5114.16	2350	5589.2
471	502.857	471	1360.12	2355	1673.79	2355	3887.58	2355	4806.12	2355	4900.76	2355	5815.59	2355	5980.75	2355	5116.01	2355	5589.2
472	503.314	472	1356.71	2360	1673.79	2360	3889.43	2360	4807.98	2360	4908.18	2360	5810.03	2360	5978.89	2360	5114.16	2360	5591.06
473	503.745	473	1353.38	2365	1671.94	2365	3885.72	2365	4806.12	2365	4910.04	2365	5810.03	2365	5978.89	2365	5112.3	2365	5592.92
474	504.151	474	1350.13	2370	1670.08	2370	3883.87	2370	4809.83	2370	4908.18	2370	5811.88	2370	5977.03	2370	5112.3	2370	5594.77
475	504.53	475	1346.96	2375	1666.37	2375	3880.15	2375	4807.98	2375	4904.47	2375	5813.74	2375	5975.18	2375	5112.3	2375	5596.63
476	504.884	476	1343.87	2380	1666.37	2380	3874.59	2380	4807.98	2380	4893.34	2380	5811.88	2380	5978.89	2380	5110.45	2380	5598.48
477	505.211	477	1340.87	2385	1664.51	2385	3872.73	2385	4807.98	2385	4880.35	2385	5813.74	2385	5977.03	2385	5110.45	2385	5600.34
478	505.512	478	1337.95	2390	1662.66	2390	3874.59	2390	4802.41	2390	4859.94	2390	5813.74	2390	5978.89	2390	5104.88	2390	5604.05
479	505.786	479	1335.11	2395	1660.8	2395	3876.44	2395	4804.27	2395	4835.81	2395	5815.59	2395	5978.89	2395	5101.17	2395	5602.19
480	506.033	480	1332.37	2400	1657.09	2400	3882.01	2400	4802.41	2400	4798.7	2400	5813.74	2400	5977.03	2400	5097.46	2400	5609.62
481	506.254	481	1329.71	2405	1655.24	2405	3885.72	2405	4802.41	2405	4748.6	2405	5817.45	2405	5978.89	2405	5097.46	2405	5611.47
482	506.448	482	1327.14	2410	1653.38	2410	3893.14	2410	4798.7	2410	4674.37	2410	5815.59	2410	5978.89	2410	5095.6	2410	5615.18
483	506.614	483	1324.66	2415	1651.52	2415	3893.14	2415	4796.84	2415	4583.44	2415	5817.45	2415	5978.89	2415	5093.75	2415	5622.61
484	506.754	484	1322.27	2420	1647.81	2420	3893.14	2420	4796.84	2420	4483.24	2420	5819.3	2420	5980.75	2420	5093.75	2420	5628.17
485	506.866	485	1319.98	2425	1644.1	2425	3893.14	2425	4798.7	2425	4384.89	2425	5823.02	2425	5986.31	2425	5095.6	2425	5628.17
486	506.951	486	1317.78	2430	1644.1	2430	3893.14	2430	4804.27	2430	4297.67	2430	5823.02	2430	5990.02	2430	5099.31	2430	5637.45
487	507.009	487	1315.67	2435	1645.96	2435	3893.14	2435	4800.55	2435	4234.58	2435	5824.87	2435	5986.31	2435	5099.31	2435	5639.31
488	507.04	488	1313.66	2440	1645.96	2440	3891.29	2440	4800.55	2440	4203.04	2440	5824.87	2440	5986.31	2440	5101.17	2440	5644.87
489	507.043	489	1311.74	2445	1647.81	2445	3895	2445	4800.55	2445	4206.75	2445	5824.87	2445	5984.46	2445	5104.88	2445	5652.3
490	507.018	490	1309.92	2450	1651.52	2450	3896.86	2450	4800.55	2450	4260.56	2450	5824.87	2450	5986.31	2450	5106.74	2450	5652.3
491	506.966	491	1308.2	2455	1649.67	2455	3898.71	2455	4802.41	2455	4353.34	2455	5823.02	2455	5988.17	2455	5108.59	2455	5654.15
492	506.887	492	1306.57	2460	1649.67	2460	3902.42	2460	4800.55	2460	4472.11	2460	5830.44	2460	5990.02	2460	5110.45	2460	5665.29
493	506.78	493	1305.04	2465	1647.81	2465	3902.42	2465	4800.55	2465	4596.43	2465	5830.44	2465	5993.73	2465	5112.3	2465	5670.85
494	506.645	494	1303.61	2470	1647.81	2470	3909.85	2470	4802.41	2470	4704.06	2470	5830.44	2470	5997.45	2470	5116.01	2470	5676.42
495	506.483	495	1302.28	2475	1649.67	2475	3911.7	2475	4804.27	2475	4787.57	2475	5830.44	2475	6001.16	2475	5117.87	2475	5683.84
496	506.294	496	1301.05	2480	1649.67	2480	3915.41	2480	4807.98	2480	4846.95	2480	5830.44	2480	6006.72	2480	5127.15	2480	5681.99
497	506.077	497	1299.92	2485	1649.67	2485	3920.98	2485	4809.83	2485	4887.77	2485	5830.44	2485	6006.72	2485	5130.86	2485	5683.84
498	505.833	498	1298.88	2490	1651.52	2490	3924.69	2490	4809.83	2490	4910.04	2490	5832.29	2490	6006.72	2490	5134.57	2490	5691.26
499	505.561	499	1297.94	2495	1651.52	2495	3928.4	2495	4809.83	2495	4921.17	2495	5830.44	2495	6008.58	2495	5140.14	2495	5693.12
500	505.262	500	1297.11	2500	1653.38	2500	3930.26	2500	4809.83	2500	4928.59	2500	5830.44	2500	6006.72	2500	5149.42	2500	5694.98
501	504.936	501	1296.37	2505	1653.38	2505	3932.11	2505	4807.98	2505	4930.45	2505	5830.44	2505	6010.44	2505	5153.13	2505	5698.69
502	504.583	502	1295.73	2510	1651.52	2510	3933.97	2510	4807.98	2510	4936.02	2510	5826.73	2510	6010.44	2510	5160.55	2510	5698.69
503	504.202	503	1295.19	2515	1651.52	2515	3937.68	2515	4804.27	2515	4937.87	2515	5828.58	2515	6010.44	2515	5167.97	2515	5704.25
504	503.795	504	1294.75	2520	1651.52	2520	3939.54	2520	4800.55	2520	4939.73	2520	5828.58	2520	6012.29	2520	5177.25	2520	5711.68
505	503.361	505	1294.4	2525	1653.38	2525	3943.25	2525	4794.99	2525	4941.58	2525	5824.87	2525	6010.44	2525	5180.96	2525	5713.53
506	502.9	506	1294.15	2530	1653.38	2530	3941.39	2530	4793.13	2530	4937.87	2530	5826.73	2530	6008.58	2530	5188.38	2530	5715.39
507	502.412	507	1294	2535	1649.67	2535	3937.68	2535	4794.99	2535	4941.58	2535	5823.02	2535	6010.44	2535	5195.81	2535	5719.1
508	501.898	508	1293.95	2540	1647.81	2540	3941.39	2540	4793.13	2540	4947.15	2540	5828.58	2540	6010.44	2540	5195.81	2540	5720.96
509	501.358	509	1293.99	2545	1644.1	2545	3937.68	2545	4794.99	2545	4952.72	2545	5826.73	2545	6008.58	2545	5195.81	2545	5722.81
510	500.791	510	1294.12	2550	1640.39	2550	3935.82	2550	4794.99	2550	4954.57	2550	5826.73	2550	6010.44	2550	5197.66	2550	5728.38
511	500.198	511	1294.35	2555	1636.68	2555	3937.68	2555	4796.84	2555	4952.72	2555	5823.02	2555	6006.72	2555	5201.37	2555	5724.67
512	499.58	512	1294.68	2560	1634.82	2560	3933.97	2560	4798.7	2560	4947.15	2560	5824.87	2560	6008.58	2560	5201.37	2560	5722.81
513	498.936	513	1295.09	2565	1631.11	2565	3932.11	2565	4800.55	2565	4939.73	2565	5823.02	2565	6006.72	2565	5203.23	2565	5726.52
514	498.266	514	1295.6	2570	1631.11	2570	3933.97	2570	4802.41	2570	4932.31	2570	5821.16	2570	6014.15	2570	5210.65	2570	5728.38
515	497.571	515	1296.2	2575	1631.11	2575	3933.97	2575	4802.41	2575	4924.88	2575	5819.3	2575	6010.44	2575	5210.65	2575	5730.23
516	496.851	516	1296.89	2580	1627.4	2580	3933.97	2580	4800.55	2580	4923.03	2580	5819.3	2580	6010.44	2580	5212.51	2580	5735.8
517	496.106	517	1297.67	2585	1625.55	2585	3933.97	2585	4802.41	2585	4924.88	2585	5819.3	2585	6010.44	2585	5218.08	2585	5750.65
518	495.337	518	1298.53	2590	1627.4	2590	3935.82	2590	4804.27	2590	4926.74	2590	5817.45	2590	6008.58	2590	5221.79	2590	5748.79
519	494.543	519	1299.48	2595	1629.26	2595	3933.97	2595	4806.12	2595	4924.88	2595	5821.16	2595	6008.58	2595	5225.5	2595	5732.09
520	493.725	520	1300.52	2600	1631.11	2600	3935.82	2600	4802.41	2600	4921.17	2600	5821.16	2600	6004.87	2600	5227.35	2600	5737.66
521	492.884	521	1301.64	2605	1632.97	2605	3937.68	2605	4802.41	2605	4915.6	2605	5821.16	2605	6008.58	2605	5232.92	2605	5746.93
522	492.019	522	1302.85	2610	1636.68	2610	3939.54	2610	4800.55	2610	4910.04	2610	5819.3	2610	6010.44	2610	5234.78	2610	5752.5
523	491.13	523	1304.13	2615	1636.68	2615	3939.54	2615	4802.41	2615	4904.47	2615	5817.45	2615	6008.58	2615	5234.78	2615	5746.93
524	490.219	524	1305.49	2620	1634.82	2620	3937.68	2620	4802.41	2620	4898.9	2620	5815.59	2620	6012.29	2620	5232.92	2620	5733.94
525	489.285	525	1306.94	2625	1634.82	2625	3939.54	2625	4800.55	2625	4895.19	2625	5815.59	2625	6010.44	2625	5231.06	2625	5730.23
526	488.328	526	1308.45	2630	1631.11	2630	3937.68	2630	4802.41	2630	4891.48	2630	5813.74	2630	6012.29	2630	5236.63	2630	5733.94
527	487.349	527	1310.05	2635	1632.97	2635	3935.82	2635	4798.7	2635	4891.48	2635	5811.88	2635	6019.71	2635	5242.2	2635	5733.94
528	486.349	528	1311.72	2640	1629.26	2640	3937.68	2640	4798.7	2640	4889.63	2640	5813.74	2640	6017.86	2640	5255.19	2640	5733.94
529	485.327	529	1313.46	2645	1625.55	2645	3935.82	2645	4798.7	2645	4895.19	2645	5817.45	2645	6019.71	2645	5253.33	2645	5735.8
530	484.285	530	1315.27	2650	1627.4	2650	3932.11	2650	4794.99	2650	4897.05	2650	5813.74	2650	6023.43	2650	5245.91	2650	5737.66
531	483.221	531	1317.14	2655	1631.11	2655	3932.11	2655	4793.13	2655	4900.76	2655	5815.59	2655	6025.28	2655	5240.34	2655	5737.66
532	482.138	532	1319.09	2660	1634.82	2660	3935.82	2660	4791.28	2660	4898.9	2660	5815.59	2660	6028.99	2660	5245.91	2660	5735.8
533	481.034	533	1321.1	2665	1642.25	2665	3932.11	2665	4785.71	2665	4898.9	2665	5819.3	2665	6032.7	2665	5249.62	2665	5745.08
534	479.911	534	1323.17	2670	1649.67	2670	3932.11	2670	4783.85	2670	4897.05	2670	5817.45	2670	6032.7	2670	5247.77	2670	5743.22
535	478.768	535	1325.3	2675	1655.24	2675	3930.26	2675	4782	2675	4897.05	2675	5821.16	2675	6038.27	2675	5249.62	2675	5746.93
536	477.607	536	1327.5	2680	1658.95	2680	3928.4	2680	4782	2680	4895.19	2680	5821.16	2680	6038.27	2680	5247.77	2680	5748.79
537	476.427	537	1329.74	2685	1660.8	2685	3930.26	2685	4780.14	2685	4893.34	2685	5819.3	2685	6041.98	2685	5249.62	2685	5745.08
538	475.23	538	1332.05	2690	1664.51	2690	3930.26	2690	4780.14	2690	4889.63	2690	5815.59	2690	6043.84	2690	5251.48	2690	5756.21
539	474.015	539	1334.41	2695	1664.51	2695	3933.97	2695	4780.14	2695	4893.34	2695	5817.45	2695	6043.84	2695	5253.33	2695	5758.07
540	472.782	540	1336.82	2700	1666.37	2700	3933.97	2700	4780.14	2700	4889.63	2700	5817.45	2700	6038.27	2700	5255.19	2700	5756.21
541	471.534	541	1339.27	2705	1668.23	2705	3932.11	2705	4782	2705	4893.34	2705	5815.59	2705	6043.84	2705	5257.04	2705	5761.78
542	470.268	542	1341.78	2710	1668.23	2710	3933.97	2710	4780.14	2710	4889.63	2710	5815.59	2710	6043.84	2710	5258.9	2710	5758.07
543	468.988	543	1344.33	2715	1671.94	2715	3930.26	2715	4780.14	2715	4887.77	2715	5817.45	2715	6045.69	2715	5262.61	2715	5756.21
544	467.691	544	1346.92	2720	1673.79	2720	3928.4	2720	4776.43	2720	4887.77	2720	5815.59	2720	6047.55	2720	5264.47	2720	5761.78
545	466.38	545	1349.55	2725	1675.65	2725	3926.55	2725	4772.72	2725	4884.06	2725	5815.59	2725	6047.55	2725	5266.32	2725	5759.92
546	465.055	546	1352.22	2730	1675.65	2730	3920.98	2730	4772.72	2730	4884.06	2730	5813.74	2730	6047.55	2730	5266.32	2730	5765.49
547	463.716	547	1354.93	2735	1675.65	2735	3913.56	2735	4769.01	2735	4885.91	2735	5819.3	2735	6047.55	2735	5264.47	2735	5763.63
548	462.363	548	1357.67	2740	1675.65	2740	3906.13	2740	4769.01	2740	4880.35	2740	5821.16	2740	6045.69	2740	5266.32	2740	5771.06
549	460.997	549	1360.44	2745	1675.65	2745	3898.71	2745	4767.15	2745	4872.93	2745	5817.45	2745	6051.26	2745	5264.47	2745	5774.77
550	459.619	550	1363.24	2750	1675.65	2750	3891.29	2750	4767.15	2750	4874.78	2750	5813.74	2750	6047.55	2750	5266.32	2750	5782.19
551	458.229	551	1366.07	2755	1675.65	2755	3883.87	2755	4763.44	2755	4874.78	2755	5817.45	2755	6041.98	2755	5262.61	2755	5785.9
552	456.828	552	1368.92	2760	1673.79	2760	3878.3	2760	4765.3	2760	4880.35	2760	5817.45	2760	6041.98	2760	5266.32	2760	5795.18
553	455.416	553	1371.8	2765	1673.79	2765	3878.3	2765	4765.3	2765	4885.91	2765	5817.45	2765	6041.98	2765	5270.03	2765	5800.75
554	453.993	554	1374.69	2770	1673.79	2770	3880.15	2770	4765.3	2770	4891.48	2770	5821.16	2770	6041.98	2770	5271.89	2770	5804.46
555	452.56	555	1377.61	2775	1670.08	2775	3882.01	2775	4763.44	2775	4904.47	2775	5821.16	2775	6043.84	2775	5271.89	2775	5810.03
556	451.119	556	1380.54	2780	1671.94	2780	3885.72	2780	4765.3	2780	4917.46	2780	5823.02	2780	6040.13	2780	5268.18	2780	5813.74
557	449.668	557	1383.48	2785	1668.23	2785	3887.58	2785	4763.44	2785	4926.74	2785	5821.16	2785	6041.98	2785	5273.74	2785	5819.3
558	448.21	558	1386.43	2790	1668.23	2790	3889.43	2790	4765.3	2790	4936.02	2790	5821.16	2790	6040.13	2790	5270.03	2790	5815.59
559	446.743	559	1389.39	2795	1664.51	2795	3891.29	2795	4767.15	2795	4941.58	2795	5819.3	2795	6038.27	2795	5275.6	2795	5819.3
560	445.27	560	1392.36	2800	1662.66	2800	3889.43	2800	4770.86	2800	4949.01	2800	5819.3	2800	6043.84	2800	5275.6	2800	5819.3
561	443.789	561	1395.33	2805	1662.66	2805	3889.43	2805	4774.58	2805	4950.86	2805	5817.45	2805	6038.27	2805	5275.6	2805	5824.87
562	442.303	562	1398.31	2810	1660.8	2810	3885.72	2810	4772.72	2810	4958.28	2810	5817.45	2810	6040.13	2810	5273.74	2810	5821.16
563	440.812	563	1401.28	2815	1660.8	2815	3885.72	2815	4772.72	2815	4962	2815	5819.3	2815	6040.13	2815	5275.6	2815	5821.16
564	439.315	564	1404.25	2820	1658.95	2820	3883.87	2820	4772.72	2820	4954.57	2820	5821.16	2820	6045.69	2820	5275.6	2820	5823.02
565	437.815	565	1407.22	2825	1658.95	2825	3882.01	2825	4772.72	2825	4950.86	2825	5823.02	2825	6049.4	2825	5279.31	2825	5821.16
566	436.31	566	1410.18	2830	1655.24	2830	3882.01	2830	4778.29	2830	4949.01	2830	5823.02	2830	6047.55	2830	5279.31	2830	5821.16
567	434.802	567	1413.12	2835	1649.67	2835	3878.3	2835	4780.14	2835	4949.01	2835	5823.02	2835	6049.4	2835	5279.31	2835	5823.02
568	433.292	568	1416.06	2840	1644.1	2840	3876.44	2840	4774.58	2840	4947.15	2840	5823.02	2840	6047.55	2840	5277.46	2840	5817.45
569	431.78	569	1418.99	2845	1636.68	2845	3870.88	2845	4772.72	2845	4949.01	2845	5824.87	2845	6051.26	2845	5275.6	2845	5823.02
570	430.266	570	1421.89	2850	1631.11	2850	3867.17	2850	4772.72	2850	4945.3	2850	5824.87	2850	6054.97	2850	5271.89	2850	5823.02
571	428.752	571	1424.78	2855	1623.69	2855	3863.45	2855	4770.86	2855	4943.44	2855	5823.02	2855	6058.68	2855	5273.74	2855	5821.16
572	427.237	572	1427.65	2860	1616.27	2860	3856.03	2860	4772.72	2860	4947.15	2860	5823.02	2860	6064.25	2860	5266.32	2860	5819.3
573	425.722	573	1430.5	2865	1610.7	2865	3852.32	2865	4770.86	2865	4952.72	2865	5824.87	2865	6066.11	2865	5268.18	2865	5819.3
574	424.208	574	1433.32	2870	1606.99	2870	3848.61	2870	4769.01	2870	4958.28	2870	5826.73	2870	6067.96	2870	5268.18	2870	5819.3
575	422.696	575	1436.11	2875	1601.42	2875	3846.75	2875	4770.86	2875	4960.14	2875	5826.73	2875	6064.25	2875	5268.18	2875	5824.87
576	421.186	576	1438.88	2880	1597.71	2880	3848.61	2880	4769.01	2880	4960.14	2880	5824.87	2880	6071.67	2880	5266.32	2880	5845.28
577	419.678	577	1441.61	2885	1594	2885	3852.32	2885	4767.15	2885	4967.56	2885	5821.16	2885	6073.53	2885	5264.47	2885	5860.13
578	418.174	578	1444.31	2890	1595.86	2890	3859.74	2890	4767.15	2890	4973.13	2890	5819.3	2890	6071.67	2890	5268.18	2890	5847.14
579	416.674	579	1446.98	2895	1595.86	2895	3867.17	2895	4765.3	2895	4982.41	2895	5823.02	2895	6075.38	2895	5268.18	2895	5839.72
580	415.177	580	1449.61	2900	1599.57	2900	3878.3	2900	4767.15	2900	4986.12	2900	5823.02	2900	6079.09	2900	5266.32	2900	5841.57
581	413.686	581	1452.21	2905	1605.13	2905	3887.58	2905	4769.01	2905	4986.12	2905	5819.3	2905	6075.38	2905	5264.47	2905	5841.57
582	412.201	582	1454.76	2910	1610.7	2910	3898.71	2910	4772.72	2910	4986.12	2910	5821.16	2910	6082.81	2910	5264.47	2910	5845.28
583	410.721	583	1457.27	2915	1616.27	2915	3904.28	2915	4772.72	2915	4986.12	2915	5823.02	2915	6080.95	2915	5264.47	2915	5839.72
584	409.248	584	1459.73	2920	1621.83	2920	3906.13	2920	4770.86	2920	4986.12	2920	5826.73	2920	6080.95	2920	5260.76	2920	5847.14
585	407.783	585	1462.15	2925	1627.4	2925	3909.85	2925	4769.01	2925	4987.98	2925	5828.58	2925	6082.81	2925	5260.76	2925	5848.99
586	406.325	586	1464.53	2930	1629.26	2930	3913.56	2930	4767.15	2930	4987.98	2930	5826.73	2930	6080.95	2930	5262.61	2930	5848.99
587	404.876	587	1466.85	2935	1631.11	2935	3915.41	2935	4763.44	2935	4989.83	2935	5824.87	2935	6082.81	2935	5262.61	2935	5854.56
588	403.435	588	1469.12	2940	1632.97	2940	3919.12	2940	4761.59	2940	4991.69	2940	5823.02	2940	6084.66	2940	5266.32	2940	5863.84
589	402.005	589	1471.35	2945	1632.97	2945	3917.27	2945	4757.88	2945	4989.83	2945	5819.3	2945	6084.66	2945	5268.18	2945	5869.41
590	400.584	590	1473.51	2950	1634.82	2950	3919.12	2950	4757.88	2950	4993.54	2950	5815.59	2950	6082.81	2950	5281.17	2950	5873.12
591	399.174	591	1475.62	2955	1632.97	2955	3919.12	2955	4754.16	2955	4993.54	2955	5815.59	2955	6084.66	2955	5292.3	2955	5873.12
592	397.775	592	1477.68	2960	1629.26	2960	3920.98	2960	4756.02	2960	4997.25	2960	5811.88	2960	6082.81	2960	5281.17	2960	5865.7
593	396.388	593	1479.68	2965	1629.26	2965	3926.55	2965	4754.16	2965	4997.25	2965	5811.88	2965	6086.52	2965	5271.89	2965	5858.27
594	395.013	594	1481.61	2970	1623.69	2970	3930.26	2970	4756.02	2970	4999.11	2970	5810.03	2970	6090.23	2970	5270.03	2970	5865.7
595	393.651	595	1483.49	2975	1623.69	2975	3933.97	2975	4754.16	2975	4999.11	2975	5811.88	2975	6088.37	2975	5273.74	2975	5858.27
596	392.302	596	1485.31	2980	1619.98	2980	3933.97	2980	4756.02	2980	4999.11	2980	5810.03	2980	6093.94	2980	5275.6	2980	5861.98
597	390.968	597	1487.06	2985	1612.56	2985	3935.82	2985	4754.16	2985	4997.25	2985	5813.74	2985	6095.8	2985	5277.46	2985	5860.13
598	389.647	598	1488.75	2990	1605.13	2990	3933.97	2990	4754.16	2990	4999.11	2990	5808.17	2990	6095.8	2990	5275.6	2990	5861.98
599	388.342	599	1490.37	2995	1597.71	2995	3939.54	2995	4752.31	2995	5002.82	2995	5808.17	2995	6093.94	2995	5277.46	2995	5865.7
600	387.052	600	1491.93	3000	1588.43	3000	3939.54	3000	4750.45	3000	5008.39	3000	5810.03	3000	6099.51	3000	5277.46	3000	5863.84
601	385.778	601	1493.42	3005	1577.3	3005	3941.39	3005	4752.31	3005	5010.24	3005	5808.17	3005	6103.22	3005	5275.6	3005	5865.7
602	384.52	602	1494.84	3010	1573.59	3010	3937.68	3010	4750.45	3010	5010.24	3010	5806.31	3010	6105.07	3010	5279.31	3010	5865.7
603	383.279	603	1496.19	3015	1571.73	3015	3937.68	3015	4750.45	3015	4999.11	3015	5802.6	3015	6101.36	3015	5273.74	3015	5865.7
604	382.056	604	1497.47	3020	1573.59	3020	3937.68	3020	4748.6	3020	4989.83	3020	5804.46	3020	6103.22	3020	5270.03	3020	5871.26
605	380.851	605	1498.68	3025	1579.15	3025	3935.82	3025	4746.74	3025	4976.84	3025	5802.6	3025	6106.93	3025	5268.18	3025	5874.97
606	379.663	606	1499.82	3030	1581.01	3030	3937.68	3030	4744.89	3030	4967.56	3030	5804.46	3030	6106.93	3030	5264.47	3030	5873.12
607	378.495	607	1500.89	3035	1579.15	3035	3933.97	3035	4741.17	3035	4958.28	3035	5806.31	3035	6110.64	3035	5260.76	3035	5873.12
608	377.346	608	1501.89	3040	1566.16	3040	3933.97	3040	4741.17	3040	4947.15	3040	5810.03	3040	6110.64	3040	5255.19	3040	5874.97
609	376.216	609	1502.81	3045	1545.75	3045	3930.26	3045	4741.17	3045	4932.31	3045	5813.74	3045	6110.64	3045	5253.33	3045	5874.97
610	375.107	610	1503.66	3050	1521.63	3050	3926.55	3050	4739.32	3050	4908.18	3050	5811.88	3050	6114.35	3050	5257.04	3050	5880.54
611	374.018	611	1504.43	3055	1504.93	3055	3919.12	3055	4737.46	3055	4882.2	3055	5808.17	3055	6116.21	3055	5255.19	3055	5884.25
612	372.95	612	1505.13	3060	1499.36	3060	3915.41	3060	4737.46	3060	4863.65	3060	5804.46	3060	6116.21	3060	5255.19	3060	5889.82
613	371.903	613	1505.76	3065	1504.93	3065	3917.27	3065	4735.61	3065	4869.21	3065	5802.6	3065	6112.5	3065	5257.04	3065	5884.25
614	370.879	614	1506.31	3070	1519.77	3070	3915.41	3070	4731.9	3070	4897.05	3070	5798.89	3070	6112.5	3070	5257.04	3070	5886.11
615	369.876	615	1506.79	3075	1545.75	3075	3917.27	3075	4730.04	3075	4939.73	3075	5798.89	3075	6114.35	3075	5260.76	3075	5882.4
616	368.896	616	1507.19	3080	1575.44	3080	3920.98	3080	4726.33	3080	4969.42	3080	5800.75	3080	6114.35	3080	5264.47	3080	5880.54
617	367.938	617	1507.52	3085	1595.86	3085	3919.12	3085	4724.47	3085	4989.83	3085	5800.75	3085	6114.35	3085	5268.18	3085	5880.54
618	367.004	618	1507.77	3090	1612.56	3090	3920.98	3090	4728.18	3090	5000.96	3090	5800.75	3090	6112.5	3090	5268.18	3090	5884.25
619	366.093	619	1507.95	3095	1618.12	3095	3920.98	3095	4728.18	3095	5002.82	3095	5802.6	3095	6114.35	3095	5268.18	3095	5882.4
620	365.207	620	1508.06	3100	1621.83	3100	3915.41	3100	4731.9	3100	5000.96	3100	5806.31	3100	6114.35	3100	5270.03	3100	5882.4
621	364.344	621	1508.09	3105	1621.83	3105	3904.28	3105	4735.61	3105	4989.83	3105	5804.46	3105	6112.5	3105	5273.74	3105	5882.4
622	363.506	622	1508.04	3110	1619.98	3110	3893.14	3110	4739.32	3110	4974.99	3110	5804.46	3110	6110.64	3110	5271.89	3110	5887.96
623	362.693	623	1507.92	3115	1619.98	3115	3880.15	3115	4741.17	3115	4945.3	3115	5802.6	3115	6103.22	3115	5273.74	3115	5887.96
624	361.905	624	1507.73	3120	1616.27	3120	3865.31	3120	4739.32	3120	4904.47	3120	5800.75	3120	6103.22	3120	5277.46	3120	5887.96
625	361.142	625	1507.47	3125	1618.12	3125	3854.18	3125	4735.61	3125	4845.09	3125	5798.89	3125	6105.07	3125	5281.17	3125	5889.82
626	360.406	626	1507.13	3130	1619.98	3130	3843.04	3130	4733.75	3130	4767.15	3130	5798.89	3130	6101.36	3130	5281.17	3130	5891.67
627	359.694	627	1506.72	3135	1621.83	3135	3837.47	3135	4730.04	3135	4657.67	3135	5802.6	3135	6095.8	3135	5288.59	3135	5900.95
628	359.01	628	1506.24	3140	1623.69	3140	3841.19	3140	4726.33	3140	4538.91	3140	5798.89	3140	6093.94	3140	5286.73	3140	5904.66
629	358.351	629	1505.69	3145	1625.55	3145	3850.46	3145	4722.62	3145	4410.87	3145	5798.89	3145	6090.23	3145	5290.45	3145	5895.39
630	357.719	630	1505.07	3150	1627.4	3150	3856.03	3150	4720.76	3150	4290.25	3150	5797.04	3150	6090.23	3150	5299.72	3150	5899.1
631	357.114	631	1504.38	3155	1631.11	3155	3863.45	3155	4718.91	3155	4197.47	3155	5800.75	3155	6088.37	3155	5301.58	3155	5897.24
632	356.536	632	1503.62	3160	1632.97	3160	3869.02	3160	4718.91	3160	4125.1	3160	5798.89	3160	6086.52	3160	5299.72	3160	5904.66
633	355.985	633	1502.8	3165	1634.82	3165	3874.59	3165	4722.62	3165	4093.55	3165	5798.89	3165	6088.37	3165	5299.72	3165	5899.1
634	355.462	634	1501.91	3170	1634.82	3170	3883.87	3170	4722.62	3170	4112.11	3170	5798.89	3170	6086.52	3170	5305.29	3170	5906.52
635	354.965	635	1500.95	3175	1638.53	3175	3891.29	3175	4724.47	3175	4171.49	3175	5798.89	3175	6093.94	3175	5305.29	3175	5912.09
636	354.497	636	1499.93	3180	1640.39	3180	3895	3180	4722.62	3180	4266.13	3180	5802.6	3180	6093.94	3180	5309	3180	5913.94
637	354.056	637	1498.85	3185	1640.39	3185	3906.13	3185	4722.62	3185	4392.31	3185	5802.6	3185	6097.65	3185	5301.58	3185	5912.09
638	353.644	638	1497.71	3190	1638.53	3190	3909.85	3190	4720.76	3190	4512.93	3190	5802.6	3190	6101.36	3190	5305.29	3190	5912.09
639	353.259	639	1496.51	3195	1638.53	3195	3915.41	3195	4718.91	3195	4618.7	3195	5802.6	3195	6103.22	3195	5309	3195	5923.22
640	352.902	640	1495.24	3200	1640.39	3200	3917.27	3200	4718.91	3200	4681.79	3200	5804.46	3200	6105.07	3200	5312.71	3200	5934.35
641	352.574	641	1493.92	3205	1640.39	3205	3922.83	3205	4720.76	3205	4717.05	3205	5802.6	3205	6106.93	3205	5312.71	3205	5949.2
642	352.274	642	1492.55	3210	1640.39	3210	3928.4	3210	4717.05	3210	4733.75	3210	5802.6	3210	6108.78	3210	5310.86	3210	5936.21
643	352.002	643	1491.11	3215	1638.53	3215	3932.11	3215	4717.05	3215	4730.04	3215	5804.46	3215	6110.64	3215	5312.71	3215	5926.93
644	351.758	644	1489.63	3220	1638.53	3220	3935.82	3220	4713.34	3220	4720.76	3220	5802.6	3220	6106.93	3220	5309	3220	5921.36
645	351.543	645	1488.09	3225	1640.39	3225	3937.68	3225	4709.63	3225	4724.47	3225	5802.6	3225	6112.5	3225	5309	3225	5923.22
646	351.356	646	1486.5	3230	1640.39	3230	3937.68	3230	4709.63	3230	4737.46	3230	5802.6	3230	6110.64	3230	5310.86	3230	5925.08
647	351.197	647	1484.87	3235	1644.1	3235	3937.68	3235	4709.63	3235	4748.6	3235	5798.89	3235	6108.78	3235	5309	3235	5923.22
648	351.067	648	1483.19	3240	1645.96	3240	3937.68	3240	4709.63	3240	4761.59	3240	5797.04	3240	6108.78	3240	5309	3240	5919.51
649	350.965	649	1481.46	3245	1645.96	3245	3932.11	3245	4704.06	3245	4776.43	3245	5793.33	3245	6108.78	3245	5314.57	3245	5919.51
650	350.891	650	1479.69	3250	1644.1	3250	3932.11	3250	4705.92	3250	4789.42	3250	5789.61	3250	6112.5	3250	5323.85	3250	5921.36
651	350.846	651	1477.88	3255	1644.1	3255	3933.97	3255	4705.92	3255	4820.97	3255	5789.61	3255	6112.5	3255	5321.99	3255	5923.22
652	350.828	652	1476.02	3260	1645.96	3260	3935.82	3260	4704.06	3260	4852.51	3260	5787.76	3260	6108.78	3260	5321.99	3260	5923.22
653	350.839	653	1474.13	3265	1649.67	3265	3939.54	3265	4700.35	3265	4884.06	3265	5784.05	3265	6108.78	3265	5318.28	3265	5930.64
654	350.878	654	1472.21	3270	1647.81	3270	3945.1	3270	4702.21	3270	4910.04	3270	5784.05	3270	6106.93	3270	5320.14	3270	5930.64
655	350.944	655	1470.24	3275	1649.67	3275	3946.96	3275	4702.21	3275	4923.03	3275	5782.19	3275	6110.64	3275	5325.7	3275	5939.92
656	351.039	656	1468.25	3280	1649.67	3280	3945.1	3280	4704.06	3280	4930.45	3280	5778.48	3280	6110.64	3280	5327.56	3280	5949.2
657	351.16	657	1466.23	3285	1651.52	3285	3945.1	3285	4700.35	3285	4934.16	3285	5774.77	3285	6108.78	3285	5329.41	3285	5956.62
658	351.31	658	1464.18	3290	1653.38	3290	3943.25	3290	4698.49	3290	4939.73	3290	5776.62	3290	6108.78	3290	5331.27	3290	5960.33
659	351.487	659	1462.1	3295	1657.09	3295	3943.25	3295	4698.49	3295	4941.58	3295	5772.91	3295	6106.93	3295	5333.13	3295	5949.2
660	351.69	660	1460	3300	1657.09	3300	3937.68	3300	4696.64	3300	4949.01	3300	5774.77	3300	6106.93	3300	5334.98	3300	5949.2
661	351.921	661	1457.87	3305	1660.8	3305	3932.11	3305	4696.64	3305	4950.86	3305	5776.62	3305	6106.93	3305	5333.13	3305	5954.77
662	352.179	662	1455.73	3310	1662.66	3310	3928.4	3310	4694.78	3310	4958.28	3310	5771.06	3310	6112.5	3310	5331.27	3310	5949.2
663	352.463	663	1453.57	3315	1662.66	3315	3924.69	3315	4696.64	3315	4954.57	3315	5771.06	3315	6116.21	3315	5333.13	3315	5949.2
664	352.773	664	1451.39	3320	1662.66	3320	3917.27	3320	4694.78	3320	4954.57	3320	5767.35	3320	6110.64	3320	5329.41	3320	5954.77
665	353.11	665	1449.2	3325	1662.66	3325	3913.56	3325	4691.07	3325	4949.01	3325	5771.06	3325	6108.78	3325	5334.98	3325	5956.62
666	353.472	666	1447	3330	1668.23	3330	3911.7	3330	4689.22	3330	4947.15	3330	5767.35	3330	6103.22	3330	5340.55	3330	5962.19
667	353.86	667	1444.79	3335	1670.08	3335	3900.57	3335	4689.22	3335	4947.15	3335	5767.35	3335	6099.51	3335	5336.84	3335	5958.48
668	354.274	668	1442.58	3340	1668.23	3340	3895	3340	4689.22	3340	4945.3	3340	5765.49	3340	6095.8	3340	5342.4	3340	5958.48
669	354.712	669	1440.36	3345	1666.37	3345	3889.43	3345	4685.5	3345	4939.73	3345	5767.35	3345	6092.08	3345	5342.4	3345	5958.48
670	355.175	670	1438.13	3350	1662.66	3350	3887.58	3350	4685.5	3350	4934.16	3350	5767.35	3350	6093.94	3350	5346.11	3350	5956.62
671	355.663	671	1435.91	3355	1660.8	3355	3878.3	3355	4687.36	3355	4926.74	3355	5767.35	3355	6092.08	3355	5344.26	3355	5951.06
672	356.175	672	1433.69	3360	1657.09	3360	3874.59	3360	4683.65	3360	4913.75	3360	5765.49	3360	6097.65	3360	5336.84	3360	5947.34
673	356.71	673	1431.47	3365	1657.09	3365	3869.02	3365	4683.65	3365	4910.04	3365	5767.35	3365	6101.36	3365	5344.26	3365	5949.2
674	357.27	674	1429.26	3370	1655.24	3370	3865.31	3370	4681.79	3370	4902.62	3370	5769.2	3370	6103.22	3370	5342.4	3370	5945.49
675	357.852	675	1427.06	3375	1655.24	3375	3861.6	3375	4679.94	3375	4902.62	3375	5772.91	3375	6106.93	3375	5342.4	3375	5949.2
676	358.457	676	1424.87	3380	1655.24	3380	3863.45	3380	4679.94	3380	4897.05	3380	5767.35	3380	6106.93	3380	5340.55	3380	5952.91
677	359.085	677	1422.7	3385	1658.95	3385	3861.6	3385	4681.79	3385	4891.48	3385	5769.2	3385	6106.93	3385	5347.97	3385	5956.62
678	359.735	678	1420.54	3390	1658.95	3390	3865.31	3390	4681.79	3390	4880.35	3390	5771.06	3390	6110.64	3390	5351.68	3390	5958.48
679	360.407	679	1418.39	3395	1658.95	3395	3870.88	3395	4681.79	3395	4861.79	3395	5772.91	3395	6114.35	3395	5351.68	3395	5960.33
680	361.099	680	1416.27	3400	1658.95	3400	3880.15	3400	4681.79	3400	4843.23	3400	5771.06	3400	6116.21	3400	5351.68	3400	5951.06
681	361.813	681	1414.17	3405	1660.8	3405	3885.72	3405	4683.65	3405	4832.1	3405	5772.91	3405	6114.35	3405	5351.68	3405	5956.62
682	362.548	682	1412.1	3410	1660.8	3410	3900.57	3410	4679.94	3410	4830.25	3410	5769.2	3410	6118.06	3410	5353.54	3410	5960.33
683	363.302	683	1410.05	3415	1655.24	3415	3907.99	3415	4681.79	3415	4832.1	3415	5771.06	3415	6118.06	3415	5357.25	3415	5964.04
684	364.076	684	1408.03	3420	1655.24	3420	3919.12	3420	4681.79	3420	4839.52	3420	5776.62	3420	6116.21	3420	5362.82	3420	5967.76
685	364.87	685	1406.04	3425	1655.24	3425	3926.55	3425	4679.94	3425	4843.23	3425	5774.77	3425	6116.21	3425	5362.82	3425	5971.47
686	365.682	686	1404.08	3430	1655.24	3430	3930.26	3430	4679.94	3430	4846.95	3430	5774.77	3430	6119.92	3430	5366.53	3430	5969.61
687	366.513	687	1402.16	3435	1657.09	3435	3937.68	3435	4678.08	3435	4852.51	3435	5774.77	3435	6125.49	3435	5368.38	3435	5969.61
688	367.362	688	1400.28	3440	1653.38	3440	3939.54	3440	4679.94	3440	4856.22	3440	5774.77	3440	6121.77	3440	5366.53	3440	5969.61
689	368.228	689	1398.43	3445	1655.24	3445	3941.39	3445	4676.23	3445	4863.65	3445	5774.77	3445	6127.34	3445	5368.38	3445	5973.32
690	369.111	690	1396.63	3450	1651.52	3450	3941.39	3450	4676.23	3450	4869.21	3450	5776.62	3450	6125.49	3450	5366.53	3450	5969.61
691	370.011	691	1394.87	3455	1651.52	3455	3943.25	3455	4678.08	3455	4878.49	3455	5778.48	3455	6127.34	3455	5368.38	3455	5969.61
692	370.927	692	1393.16	3460	1649.67	3460	3945.1	3460	4674.37	3460	4889.63	3460	5780.34	3460	6129.2	3460	5366.53	3460	5975.18
693	371.858	693	1391.49	3465	1653.38	3465	3943.25	3465	4668.8	3465	4906.33	3465	5778.48	3465	6129.2	3465	5366.53	3465	5978.89
694	372.805	694	1389.88	3470	1651.52	3470	3946.96	3470	4670.66	3470	4921.17	3470	5776.62	3470	6129.2	3470	5362.82	3470	5980.75
695	373.766	695	1388.31	3475	1645.96	3475	3946.96	3475	4668.8	3475	4937.87	3475	5772.91	3475	6132.91	3475	5366.53	3475	5977.03
696	374.742	696	1386.8	3480	1644.1	3480	3946.96	3480	4668.8	3480	4958.28	3480	5772.91	3480	6132.91	3480	5360.96	3480	5977.03
697	375.731	697	1385.34	3485	1638.53	3485	3950.67	3485	4670.66	3485	4967.56	3485	5774.77	3485	6134.76	3485	5360.96	3485	5984.46
698	376.733	698	1383.93	3490	1636.68	3490	3952.52	3490	4674.37	3490	4969.42	3490	5772.91	3490	6140.33	3490	5357.25	3490	5984.46
699	377.747	699	1382.59	3495	1640.39	3495	3959.95	3495	4670.66	3495	4976.84	3495	5771.06	3495	6134.76	3495	5357.25	3495	5990.02
700	378.774	700	1381.31	3500	1642.25	3500	3959.95	3500	4672.52	3500	4991.69	3500	5771.06	3500	6132.91	3500	5360.96	3500	5995.59
701	379.813	701	1380.08	3505	1644.1	3505	3954.38	3505	4674.37	3505	4995.4	3505	5769.2	3505	6134.76	3505	5360.96	3505	5993.73
702	380.862	702	1378.92	3510	1645.96	3510	3950.67	3510	4674.37	3510	5006.53	3510	5772.91	3510	6138.48	3510	5360.96	3510	5993.73
703	381.923	703	1377.82	3515	1649.67	3515	3946.96	3515	4672.52	3515	5008.39	3515	5772.91	3515	6136.62	3515	5360.96	3515	5995.59
704	382.993	704	1376.79	3520	1647.81	3520	3945.1	3520	4672.52	3520	5015.81	3520	5780.34	3520	6138.48	3520	5360.96	3520	5993.73
705	384.073	705	1375.83	3525	1645.96	3525	3943.25	3525	4670.66	3525	5023.23	3525	5784.05	3525	6132.91	3525	5357.25	3525	5993.73
706	385.161	706	1374.93	3530	1647.81	3530	3946.96	3530	4672.52	3530	5032.51	3530	5778.48	3530	6129.2	3530	5357.25	3530	5999.3
707	386.259	707	1374.11	3535	1647.81	3535	3943.25	3535	4668.8	3535	5038.08	3535	5771.06	3535	6129.2	3535	5355.39	3535	6003.01
708	387.364	708	1373.35	3540	1651.52	3540	3943.25	3540	4668.8	3540	5043.64	3540	5769.2	3540	6125.49	3540	5359.1	3540	6006.72
709	388.476	709	1372.67	3545	1653.38	3545	3943.25	3545	4665.09	3545	5049.21	3545	5772.91	3545	6123.63	3545	5355.39	3545	6012.29
710	389.596	710	1372.06	3550	1655.24	3550	3945.1	3550	4666.95	3550	5051.07	3550	5771.06	3550	6121.77	3550	5359.1	3550	6008.58
711	390.722	711	1371.53	3555	1653.38	3555	3943.25	3555	4663.24	3555	5054.78	3555	5774.77	3555	6121.77	3555	5357.25	3555	6008.58
712	391.854	712	1371.07	3560	1655.24	3560	3943.25	3560	4663.24	3560	5049.21	3560	5778.48	3560	6119.92	3560	5357.25	3560	5993.73
713	392.991	713	1370.68	3565	1657.09	3565	3945.1	3565	4661.38	3565	5051.07	3565	5782.19	3565	6121.77	3565	5359.1	3565	5988.17
714	394.132	714	1370.38	3570	1660.8	3570	3939.54	3570	4661.38	3570	5049.21	3570	5782.19	3570	6123.63	3570	5359.1	3570	5990.02
715	395.279	715	1370.15	3575	1660.8	3575	3939.54	3575	4661.38	3575	5041.79	3575	5780.34	3575	6118.06	3575	5357.25	3575	5993.73
716	396.429	716	1370	3580	1664.51	3580	3937.68	3580	4659.53	3580	5041.79	3580	5784.05	3580	6121.77	3580	5359.1	3580	5993.73
717	397.582	717	1369.93	3585	1664.51	3585	3939.54	3585	4659.53	3585	5038.08	3585	5785.9	3585	6121.77	3585	5362.82	3585	6001.16
718	398.737	718	1369.93	3590	1666.37	3590	3937.68	3590	4657.67	3590	5036.22	3590	5785.9	3590	6123.63	3590	5364.67	3590	6010.44
719	399.895	719	1370.02	3595	1666.37	3595	3935.82	3595	4657.67	3595	5032.51	3595	5787.76	3595	6125.49	3595	5359.1	3595	6019.71
720	401.055	720	1370.19	3600	1670.08	3600	3935.82	3600	4657.67	3600	5028.8	3600	5791.47	3600	6125.49	3600	5362.82	3600	6028.99
721	402.216	721	1370.45	3605	1668.23	3605	3935.82	3605	4655.81	3605	5026.94	3605	5791.47	3605	6127.34	3605	5362.82	3605	6023.43
722	403.378	722	1370.78	3610	1668.23	3610	3937.68	3610	4652.1	3610	5023.23	3610	5789.61	3610	6127.34	3610	5368.38	3610	6027.14
723	404.539	723	1371.19	3615	1666.37	3615	3937.68	3615	4648.39	3615	5019.52	3615	5787.76	3615	6129.2	3615	5370.24	3615	6030.85
724	405.701	724	1371.69	3620	1668.23	3620	3939.54	3620	4650.25	3620	5015.81	3620	5785.9	3620	6129.2	3620	5368.38	3620	6036.41
725	406.861	725	1372.27	3625	1670.08	3625	3939.54	3625	4650.25	3625	5019.52	3625	5780.34	3625	6131.05	3625	5370.24	3625	6043.84
726	408.02	726	1372.93	3630	1670.08	3630	3939.54	3630	4648.39	3630	5021.38	3630	5780.34	3630	6132.91	3630	5370.24	3630	6043.84
727	409.178	727	1373.67	3635	1670.08	3635	3937.68	3635	4646.54	3635	5025.09	3635	5774.77	3635	6134.76	3635	5373.95	3635	6045.69
728	410.333	728	1374.5	3640	1666.37	3640	3937.68	3640	4644.68	3640	5028.8	3640	5776.62	3640	6140.33	3640	5375.81	3640	6047.55
729	411.485	729	1375.41	3645	1668.23	3645	3935.82	3645	4644.68	3645	5030.65	3645	5778.48	3645	6144.04	3645	5373.95	3645	6047.55
730	412.634	730	1376.39	3650	1662.66	3650	3932.11	3650	4642.83	3650	5034.37	3650	5774.77	3650	6149.61	3650	5377.66	3650	6047.55
731	413.779	731	1377.46	3655	1660.8	3655	3930.26	3655	4640.97	3655	5036.22	3655	5774.77	3655	6147.75	3655	5377.66	3655	6047.55
732	414.92	732	1378.61	3660	1662.66	3660	3930.26	3660	4642.83	3660	5036.22	3660	5776.62	3660	6140.33	3660	5381.37	3660	6049.4
733	416.057	733	1379.85	3665	1660.8	3665	3930.26	3665	4642.83	3665	5036.22	3665	5774.77	3665	6144.04	3665	5381.37	3665	6047.55
734	417.188	734	1381.16	3670	1657.09	3670	3930.26	3670	4639.11	3670	5038.08	3670	5776.62	3670	6140.33	3670	5381.37	3670	6053.12
735	418.314	735	1382.55	3675	1651.52	3675	3926.55	3675	4639.11	3675	5038.08	3675	5778.48	3675	6144.04	3675	5381.37	3675	6056.83
736	419.434	736	1384.02	3680	1651.52	3680	3924.69	3680	4637.26	3680	5038.08	3680	5778.48	3680	6145.9	3680	5381.37	3680	6058.68
737	420.547	737	1385.56	3685	1647.81	3685	3922.83	3685	4640.97	3685	5038.08	3685	5778.48	3685	6142.19	3685	5383.23	3685	6053.12
738	421.654	738	1387.19	3690	1649.67	3690	3919.12	3690	4637.26	3690	5034.37	3690	5780.34	3690	6144.04	3690	5383.23	3690	6054.97
739	422.753	739	1388.89	3695	1647.81	3695	3917.27	3695	4640.97	3695	5030.65	3695	5780.34	3695	6144.04	3695	5388.79	3695	6054.97
740	423.845	740	1390.66	3700	1645.96	3700	3917.27	3700	4639.11	3700	5025.09	3700	5780.34	3700	6147.75	3700	5386.94	3700	6054.97
741	424.929	741	1392.51	3705	1645.96	3705	3915.41	3705	4639.11	3705	5017.67	3705	5782.19	3705	6145.9	3705	5383.23	3705	6056.83
742	426.004	742	1394.43	3710	1647.81	3710	3913.56	3710	4640.97	3710	5017.67	3710	5780.34	3710	6147.75	3710	5379.52	3710	6062.39
743	427.07	743	1396.43	3715	1647.81	3715	3911.7	3715	4642.83	3715	5015.81	3715	5784.05	3715	6147.75	3715	5379.52	3715	6058.68
744	428.127	744	1398.49	3720	1644.1	3720	3911.7	3720	4640.97	3720	5012.1	3720	5785.9	3720	6151.46	3720	5383.23	3720	6067.96
745	429.175	745	1400.62	3725	1645.96	3725	3915.41	3725	4640.97	3725	5004.68	3725	5787.76	3725	6151.46	3725	5383.23	3725	6066.11
746	430.212	746	1402.83	3730	1647.81	3730	3915.41	3730	4640.97	3730	4997.25	3730	5789.61	3730	6153.32	3730	5386.94	3730	6064.25
747	431.239	747	1405.09	3735	1651.52	3735	3919.12	3735	4637.26	3735	4987.98	3735	5785.9	3735	6155.18	3735	5385.08	3735	6066.11
748	432.255	748	1407.43	3740	1657.09	3740	3920.98	3740	4635.4	3740	4973.13	3740	5784.05	3740	6155.18	3740	5386.94	3740	6066.11
749	433.261	749	1409.82	3745	1655.24	3745	3920.98	3745	4635.4	3745	4956.43	3745	5784.05	3745	6155.18	3745	5388.79	3745	6066.11
750	434.255	750	1412.28	3750	1657.09	3750	3922.83	3750	4635.4	3750	4939.73	3750	5784.05	3750	6160.74	3750	5390.65	3750	6067.96
751	435.237	751	1414.8	3755	1657.09	3755	3924.69	3755	4633.55	3755	4919.32	3755	5784.05	3755	6158.89	3755	5392.51	3755	6066.11
752	436.207	752	1417.38	3760	1657.09	3760	3928.4	3760	4631.69	3760	4902.62	3760	5785.9	3760	6164.45	3760	5396.22	3760	6066.11
753	437.165	753	1420.01	3765	1657.09	3765	3930.26	3765	4627.98	3765	4891.48	3765	5784.05	3765	6162.6	3765	5396.22	3765	6067.96
754	438.11	754	1422.7	3770	1655.24	3770	3932.11	3770	4629.84	3770	4880.35	3770	5785.9	3770	6164.45	3770	5401.78	3770	6069.82
755	439.043	755	1425.44	3775	1655.24	3775	3930.26	3775	4635.4	3775	4861.79	3775	5787.76	3775	6162.6	3775	5399.93	3775	6073.53
756	439.962	756	1428.23	3780	1657.09	3780	3932.11	3780	4633.55	3780	4841.38	3780	5785.9	3780	6162.6	3780	5403.64	3780	6066.11
757	440.867	757	1431.07	3785	1662.66	3785	3932.11	3785	4629.84	3785	4809.83	3785	5787.76	3785	6162.6	3785	5405.5	3785	6073.53
758	441.759	758	1433.96	3790	1662.66	3790	3932.11	3790	4624.27	3790	4785.71	3790	5785.9	3790	6162.6	3790	5411.06	3790	6075.38
759	442.637	759	1436.89	3795	1660.8	3795	3933.97	3795	4622.41	3795	4763.44	3795	5782.19	3795	6162.6	3795	5416.63	3795	6067.96
760	443.501	760	1439.86	3800	1660.8	3800	3935.82	3800	4622.41	3800	4750.45	3800	5784.05	3800	6160.74	3800	5411.06	3800	6067.96
761	444.35	761	1442.88	3805	1660.8	3805	3932.11	3805	4622.41	3805	4744.89	3805	5780.34	3805	6160.74	3805	5412.92	3805	6071.67
762	445.184	762	1445.93	3810	1658.95	3810	3933.97	3810	4622.41	3810	4739.32	3810	5784.05	3810	6162.6	3810	5416.63	3810	6071.67
763	446.003	763	1449.02	3815	1658.95	3815	3932.11	3815	4622.41	3815	4746.74	3815	5784.05	3815	6164.45	3815	5414.77	3815	6077.24
764	446.807	764	1452.14	3820	1660.8	3820	3935.82	3820	4622.41	3820	4772.72	3820	5784.05	3820	6166.31	3820	5416.63	3820	6079.09
765	447.595	765	1455.29	3825	1657.09	3825	3939.54	3825	4622.41	3825	4809.83	3825	5784.05	3825	6166.31	3825	5414.77	3825	6088.37
766	448.368	766	1458.48	3830	1655.24	3830	3943.25	3830	4622.41	3830	4845.09	3830	5782.19	3830	6166.31	3830	5414.77	3830	6093.94
767	449.125	767	1461.69	3835	1655.24	3835	3941.39	3835	4624.27	3835	4884.06	3835	5778.48	3835	6166.31	3835	5412.92	3835	6099.51
768	449.866	768	1464.92	3840	1658.95	3840	3939.54	3840	4624.27	3840	4911.89	3840	5782.19	3840	6162.6	3840	5418.48	3840	6099.51
769	450.591	769	1468.18	3845	1658.95	3845	3937.68	3845	4627.98	3845	4932.31	3845	5778.48	3845	6162.6	3845	5418.48	3845	6103.22
770	451.299	770	1471.45	3850	1658.95	3850	3939.54	3850	4629.84	3850	4947.15	3850	5776.62	3850	6166.31	3850	5420.34	3850	6103.22
771	451.991	771	1474.74	3855	1655.24	3855	3939.54	3855	4627.98	3855	4962	3855	5780.34	3855	6166.31	3855	5418.48	3855	6097.65
772	452.666	772	1478.05	3860	1657.09	3860	3939.54	3860	4624.27	3860	4974.99	3860	5784.05	3860	6166.31	3860	5418.48	3860	6097.65
773	453.325	773	1481.36	3865	1658.95	3865	3941.39	3865	4624.27	3865	4987.98	3865	5787.76	3865	6166.31	3865	5422.2	3865	6093.94
774	453.966	774	1484.69	3870	1657.09	3870	3939.54	3870	4626.12	3870	4995.4	3870	5791.47	3870	6171.88	3870	5424.05	3870	6095.8
775	454.59	775	1488.03	3875	1658.95	3875	3937.68	3875	4624.27	3875	4999.11	3875	5793.33	3875	6171.88	3875	5420.34	3875	6097.65
776	455.197	776	1491.36	3880	1658.95	3880	3937.68	3880	4622.41	3880	5006.53	3880	5791.47	3880	6171.88	3880	5422.2	3880	6103.22
777	455.786	777	1494.7	3885	1658.95	3885	3935.82	3885	4620.56	3885	5008.39	3885	5780.34	3885	6173.73	3885	5425.91	3885	6112.5
778	456.358	778	1498.04	3890	1657.09	3890	3933.97	3890	4622.41	3890	5017.67	3890	5778.48	3890	6171.88	3890	5427.76	3890	6110.64
779	456.912	779	1501.38	3895	1657.09	3895	3933.97	3895	4622.41	3895	5026.94	3895	5772.91	3895	6171.88	3895	5427.76	3895	6108.78
780	457.448	780	1504.71	3900	1655.24	3900	3930.26	3900	4622.41	3900	5034.37	3900	5776.62	3900	6173.73	3900	5433.33	3900	6116.21
781	457.967	781	1508.03	3905	1655.24	3905	3928.4	3905	4622.41	3905	5030.65	3905	5772.91	3905	6177.44	3905	5433.33	3905	6116.21
782	458.467	782	1511.34	3910	1651.52	3910	3926.55	3910	4624.27	3910	5025.09	3910	5772.91	3910	6179.3	3910	5433.33	3910	6118.06
783	458.95	783	1514.64	3915	1647.81	3915	3928.4	3915	4622.41	3915	5012.1	3915	5774.77	3915	6183.01	3915	5435.19	3915	6119.92
784	459.414	784	1517.92	3920	1645.96	3920	3928.4	3920	4620.56	3920	5002.82	3920	5774.77	3920	6181.16	3920	5438.9	3920	6119.92
785	459.861	785	1521.19	3925	1645.96	3925	3928.4	3925	4618.7	3925	4993.54	3925	5774.77	3925	6177.44	3925	5440.75	3925	6112.5
786	460.289	786	1524.43	3930	1644.1	3930	3930.26	3930	4616.85	3930	4991.69	3930	5778.48	3930	6175.59	3930	5438.9	3930	6103.22
787	460.698	787	1527.65	3935	1644.1	3935	3932.11	3935	4613.13	3935	4997.25	3935	5780.34	3935	6181.16	3935	5438.9	3935	6095.8
788	461.09	788	1530.85	3940	1649.67	3940	3930.26	3940	4611.28	3940	5008.39	3940	5780.34	3940	6175.59	3940	5438.9	3940	6093.94
789	461.462	789	1534.02	3945	1651.52	3945	3930.26	3945	4611.28	3945	5017.67	3945	5782.19	3945	6179.3	3945	5440.75	3945	6093.94
790	461.817	790	1537.16	3950	1653.38	3950	3930.26	3950	4611.28	3950	5025.09	3950	5784.05	3950	6168.17	3950	5446.32	3950	6093.94
791	462.153	791	1540.26	3955	1651.52	3955	3930.26	3955	4609.42	3955	5030.65	3955	5785.9	3955	6166.31	3955	5448.18	3955	6093.94
792	462.47	792	1543.34	3960	1651.52	3960	3928.4	3960	4609.42	3960	5038.08	3960	5784.05	3960	6170.02	3960	5444.46	3960	6093.94
793	462.769	793	1546.37	3965	1649.67	3965	3928.4	3965	4605.71	3965	5041.79	3965	5784.05	3965	6168.17	3965	5448.18	3965	6101.36
794	463.049	794	1549.37	3970	1651.52	3970	3926.55	3970	4603.86	3970	5054.78	3970	5784.05	3970	6177.44	3970	5451.89	3970	6105.07
795	463.31	795	1552.33	3975	1653.38	3975	3924.69	3975	4603.86	3975	5060.35	3975	5782.19	3975	6183.01	3975	5455.6	3975	6112.5
796	463.553	796	1555.24	3980	1655.24	3980	3919.12	3980	4602	3980	5062.2	3980	5782.19	3980	6190.43	3980	5464.88	3980	6106.93
797	463.777	797	1558.12	3985	1651.52	3985	3917.27	3985	4602	3985	5065.91	3985	5782.19	3985	6186.72	3985	5463.02	3985	6108.78
798	463.982	798	1560.94	3990	1632.97	3990	3915.41	3990	4602	3990	5067.77	3990	5782.19	3990	6186.72	3990	5459.31	3990	6108.78
799	464.168	799	1563.72	3995	1603.28	3995	3920.98	3995	4602	3995	5064.06	3995	5784.05	3995	6183.01	3995	5464.88	3995	6116.21
800	464.336	800	1566.45	4000	1569.88	4000	3928.4	4000	4600.15	4000	5052.92	4000	5780.34	4000	6181.16	4000	5464.88	4000	6116.21
801	464.485	801	1569.12	4005	1547.61	4005	3935.82	4005	4596.43	4005	5039.93	4005	5780.34	4005	6183.01	4005	5466.73	4005	6116.21
802	464.616	802	1571.75	4010	1538.33	4010	3941.39	4010	4598.29	4010	5015.81	4010	5780.34	4010	6188.58	4010	5470.44	4010	6121.77
803	464.727	803	1574.32	4015	1543.9	4015	3943.25	4015	4602	4015	4991.69	4015	5782.19	4015	6186.72	4015	5470.44	4015	6123.63
804	464.82	804	1576.83	4020	1577.3	4020	3946.96	4020	4596.43	4020	4958.28	4020	5784.05	4020	6190.43	4020	5466.73	4020	6127.34
805	464.895	805	1579.28	4025	1616.27	4025	3946.96	4025	4596.43	4025	4923.03	4025	5784.05	4025	6192.29	4025	5468.59	4025	6131.05
806	464.95	806	1581.68	4030	1644.1	4030	3948.81	4030	4594.58	4030	4876.64	4030	5782.19	4030	6194.14	4030	5470.44	4030	6131.05
807	464.987	807	1584.02	4035	1660.8	4035	3945.1	4035	4592.72	4035	4820.97	4035	5784.05	4035	6192.29	4035	5474.15	4035	6132.91
808	465.006	808	1586.3	4040	1664.51	4040	3945.1	4040	4592.72	4040	4756.02	4040	5784.05	4040	6197.86	4040	5476.01	4040	6136.62
809	465.005	809	1588.51	4045	1664.51	4045	3945.1	4045	4592.72	4045	4689.22	4045	5778.48	4045	6197.86	4045	5479.72	4045	6134.76
810	464.987	810	1590.66	4050	1666.37	4050	3943.25	4050	4590.87	4050	4613.13	4050	5778.48	4050	6197.86	4050	5479.72	4050	6136.62
811	464.949	811	1592.75	4055	1664.51	4055	3941.39	4055	4590.87	4055	4524.06	4055	5784.05	4055	6199.71	4055	5481.58	4055	6140.33
812	464.894	812	1594.78	4060	1664.51	4060	3941.39	4060	4589.01	4060	4438.7	4060	5784.05	4060	6201.57	4060	5481.58	4060	6145.9
813	464.819	813	1596.74	4065	1666.37	4065	3941.39	4065	4585.3	4065	4370.05	4065	5785.9	4065	6197.86	4065	5483.43	4065	6149.61
814	464.727	814	1598.63	4070	1664.51	4070	3943.25	4070	4583.44	4070	4321.8	4070	5787.76	4070	6197.86	4070	5485.29	4070	6155.18
815	464.616	815	1600.46	4075	1662.66	4075	3943.25	4075	4572.31	4075	4301.39	4075	5787.76	4075	6199.71	4075	5487.14	4075	6157.03
816	464.487	816	1602.22	4080	1664.51	4080	3945.1	4080	4566.74	4080	4305.1	4080	5787.76	4080	6201.57	4080	5485.29	4080	6166.31
817	464.34	817	1603.91	4085	1660.8	4085	3943.25	4085	4563.03	4085	4338.5	4085	5791.47	4085	6199.71	4085	5490.86	4085	6168.17
818	464.175	818	1605.54	4090	1660.8	4090	3943.25	4090	4568.6	4090	4401.59	4090	5791.47	4090	6201.57	4090	5490.86	4090	6164.45
819	463.991	819	1607.1	4095	1662.66	4095	3945.1	4095	4572.31	4095	4488.81	4095	5789.61	4095	6201.57	4095	5490.86	4095	6166.31
820	463.79	820	1608.6	4100	1660.8	4100	3945.1	4100	4579.73	4100	4583.44	4100	5791.47	4100	6205.28	4100	5492.71	4100	6170.02
821	463.571	821	1610.02	4105	1660.8	4105	3943.25	4105	4589.01	4105	4676.23	4105	5787.76	4105	6205.28	4105	5494.57	4105	6166.31
822	463.334	822	1611.38	4110	1662.66	4110	3945.1	4110	4590.87	4110	4757.88	4110	5787.76	4110	6203.42	4110	5498.28	4110	6166.31
823	463.08	823	1612.68	4115	1662.66	4115	3945.1	4115	4590.87	4115	4819.11	4115	5784.05	4115	6201.57	4115	5500.13	4115	6160.74
824	462.808	824	1613.91	4120	1662.66	4120	3945.1	4120	4589.01	4120	4865.5	4120	5782.19	4120	6201.57	4120	5501.99	4120	6158.89
825	462.519	825	1615.07	4125	1662.66	4125	3948.81	4125	4589.01	4125	4889.63	4125	5780.34	4125	6201.57	4125	5501.99	4125	6149.61
826	462.212	826	1616.17	4130	1660.8	4130	3946.96	4130	4587.16	4130	4910.04	4130	5780.34	4130	6201.57	4130	5501.99	4130	6147.75
827	461.889	827	1617.2	4135	1660.8	4135	3950.67	4135	4583.44	4135	4930.45	4135	5780.34	4135	6201.57	4135	5505.7	4135	6147.75
828	461.548	828	1618.17	4140	1658.95	4140	3952.52	4140	4583.44	4140	4950.86	4140	5780.34	4140	6201.57	4140	5501.99	4140	6149.61
829	461.19	829	1619.08	4145	1657.09	4145	3952.52	4145	4581.59	4145	4960.14	4145	5780.34	4145	6199.71	4145	5503.84	4145	6149.61
830	460.816	830	1619.93	4150	1658.95	4150	3950.67	4150	4581.59	4150	4976.84	4150	5780.34	4150	6196	4150	5505.7	4150	6153.32
831	460.426	831	1620.72	4155	1662.66	4155	3948.81	4155	4581.59	4155	4989.83	4155	5782.19	4155	6199.71	4155	5503.84	4155	6151.46
832	460.019	832	1621.45	4160	1662.66	4160	3946.96	4160	4579.73	4160	5004.68	4160	5784.05	4160	6197.86	4160	5503.84	4160	6145.9
833	459.596	833	1622.12	4165	1662.66	4165	3943.25	4165	4577.88	4165	5013.95	4165	5785.9	4165	6201.57	4165	5507.56	4165	6149.61
834	459.157	834	1622.73	4170	1662.66	4170	3945.1	4170	4574.17	4170	5021.38	4170	5784.05	4170	6203.42	4170	5509.41	4170	6145.9
835	458.702	835	1623.29	4175	1664.51	4175	3946.96	4175	4572.31	4175	5019.52	4175	5791.47	4175	6207.13	4175	5507.56	4175	6149.61
836	458.232	836	1623.8	4180	1662.66	4180	3946.96	4180	4570.45	4180	5010.24	4180	5789.61	4180	6205.28	4180	5509.41	4180	6162.6
837	457.747	837	1624.25	4185	1662.66	4185	3945.1	4185	4572.31	4185	5002.82	4185	5791.47	4185	6205.28	4185	5509.41	4185	6160.74
838	457.247	838	1624.65	4190	1664.51	4190	3946.96	4190	4574.17	4190	4991.69	4190	5791.47	4190	6203.42	4190	5509.41	4190	6157.03
839	456.733	839	1625.01	4195	1664.51	4195	3948.81	4195	4572.31	4195	4974.99	4195	5795.18	4195	6208.99	4195	5509.41	4195	6153.32
840	456.204	840	1625.31	4200	1666.37	4200	3946.96	4200	4574.17	4200	4954.57	4200	5798.89	4200	6212.7	4200	5507.56	4200	6158.89
841	455.661	841	1625.58	4205	1666.37	4205	3946.96	4205	4576.02	4205	4937.87	4205	5797.04	4205	6210.85	4205	5507.56	4205	6162.6
842	455.105	842	1625.8	4210	1668.23	4210	3945.1	4210	4574.17	4210	4919.32	4210	5798.89	4210	6208.99	4210	5505.7	4210	6171.88
843	454.535	843	1625.98	4215	1673.79	4215	3945.1	4215	4577.88	4215	4911.89	4215	5800.75	4215	6208.99	4215	5505.7	4215	6175.59
844	453.952	844	1626.11	4220	1673.79	4220	3941.39	4220	4574.17	4220	4902.62	4220	5798.89	4220	6207.13	4220	5503.84	4220	6173.73
845	453.357	845	1626.22	4225	1671.94	4225	3939.54	4225	4572.31	4225	4898.9	4225	5797.04	4225	6214.56	4225	5503.84	4225	6175.59
846	452.75	846	1626.28	4230	1673.79	4230	3939.54	4230	4574.17	4230	4898.9	4230	5795.18	4230	6212.7	4230	5507.56	4230	6175.59
847	452.131	847	1626.31	4235	1675.65	4235	3933.97	4235	4574.17	4235	4902.62	4235	5793.33	4235	6212.7	4235	5509.41	4235	6177.44
848	451.501	848	1626.32	4240	1677.5	4240	3933.97	4240	4572.31	4240	4910.04	4240	5793.33	4240	6212.7	4240	5511.27	4240	6177.44
849	450.86	849	1626.29	4245	1679.36	4245	3933.97	4245	4574.17	4245	4919.32	4245	5797.04	4245	6212.7	4245	5513.12	4245	6183.01
850	450.209	850	1626.23	4250	1677.5	4250	3932.11	4250	4574.17	4250	4937.87	4250	5797.04	4250	6214.56	4250	5509.41	4250	6184.87
851	449.548	851	1626.15	4255	1677.5	4255	3937.68	4255	4574.17	4255	4956.43	4255	5800.75	4255	6214.56	4255	5509.41	4255	6194.14
852	448.879	852	1626.05	4260	1675.65	4260	3939.54	4260	4572.31	4260	4973.13	4260	5802.6	4260	6212.7	4260	5507.56	4260	6208.99
853	448.201	853	1625.92	4265	1679.36	4265	3941.39	4265	4572.31	4265	4986.12	4265	5804.46	4265	6210.85	4265	5505.7	4265	6220.12
854	447.515	854	1625.77	4270	1679.36	4270	3941.39	4270	4570.45	4270	4997.25	4270	5806.31	4270	6214.56	4270	5507.56	4270	6218.27
855	446.821	855	1625.61	4275	1679.36	4275	3937.68	4275	4570.45	4275	4993.54	4275	5798.89	4275	6210.85	4275	5511.27	4275	6205.28
856	446.122	856	1625.43	4280	1681.21	4280	3937.68	4280	4568.6	4280	4995.4	4280	5793.33	4280	6210.85	4280	5514.98	4280	6192.29
857	445.416	857	1625.23	4285	1681.21	4285	3937.68	4285	4570.45	4285	4997.25	4285	5793.33	4285	6212.7	4285	5514.98	4285	6188.58
858	444.706	858	1625.03	4290	1681.21	4290	3933.97	4290	4568.6	4290	4993.54	4290	5791.47	4290	6212.7	4290	5516.83	4290	6192.29
859	443.991	859	1624.81	4295	1681.21	4295	3935.82	4295	4566.74	4295	4995.4	4295	5791.47	4295	6220.12	4295	5518.69	4295	6192.29
860	443.273	860	1624.58	4300	1681.21	4300	3937.68	4300	4566.74	4300	4987.98	4300	5793.33	4300	6221.98	4300	5514.98	4300	6192.29
861	442.552	861	1624.34	4305	1683.07	4305	3933.97	4305	4563.03	4305	4980.55	4305	5789.61	4305	6218.27	4305	5520.55	4305	6188.58
862	441.829	862	1624.09	4310	1681.21	4310	3935.82	4310	4563.03	4310	4973.13	4310	5791.47	4310	6218.27	4310	5520.55	4310	6196
863	441.106	863	1623.83	4315	1681.21	4315	3939.54	4315	4561.18	4315	4969.42	4315	5791.47	4315	6216.41	4315	5526.11	4315	6194.14
864	440.383	864	1623.57	4320	1681.21	4320	3939.54	4320	4564.89	4320	4969.42	4320	5791.47	4320	6216.41	4320	5529.82	4320	6196
865	439.661	865	1623.3	4325	1681.21	4325	3937.68	4325	4563.03	4325	4965.71	4325	5795.18	4325	6214.56	4325	5531.68	4325	6196
866	438.942	866	1623.03	4330	1684.93	4330	3935.82	4330	4563.03	4330	4971.27	4330	5795.18	4330	6216.41	4330	5531.68	4330	6199.71
867	438.225	867	1622.75	4335	1681.21	4335	3935.82	4335	4561.18	4335	4982.41	4335	5791.47	4335	6216.41	4335	5529.82	4335	6205.28
868	437.514	868	1622.47	4340	1690.49	4340	3935.82	4340	4563.03	4340	4987.98	4340	5791.47	4340	6218.27	4340	5533.53	4340	6212.7
869	436.807	869	1622.17	4345	1699.77	4345	3937.68	4345	4557.47	4345	4999.11	4345	5793.33	4345	6221.98	4345	5531.68	4345	6216.41
870	436.108	870	1621.87	4350	1694.2	4350	3939.54	4350	4559.32	4350	5006.53	4350	5789.61	4350	6223.84	4350	5529.82	4350	6218.27
871	435.416	871	1621.57	4355	1681.21	4355	3941.39	4355	4557.47	4355	5012.1	4355	5793.33	4355	6221.98	4355	5529.82	4355	6214.56
872	434.734	872	1621.25	4360	1677.5	4360	3941.39	4360	4559.32	4360	5019.52	4360	5789.61	4360	6218.27	4360	5531.68	4360	6220.12
873	434.063	873	1620.92	4365	1677.5	4365	3941.39	4365	4559.32	4365	5021.38	4365	5787.76	4365	6220.12	4365	5531.68	4365	6220.12
874	433.403	874	1620.58	4370	1673.79	4370	3939.54	4370	4559.32	4370	5023.23	4370	5785.9	4370	6216.41	4370	5533.53	4370	6220.12
875	432.757	875	1620.22	4375	1675.65	4375	3935.82	4375	4561.18	4375	5023.23	4375	5785.9	4375	6218.27	4375	5533.53	4375	6227.55
876	432.126	876	1619.84	4380	1677.5	4380	3933.97	4380	4561.18	4380	5012.1	4380	5784.05	4380	6221.98	4380	5529.82	4380	6231.26
877	431.51	877	1619.44	4385	1677.5	4385	3932.11	4385	4559.32	4385	5004.68	4385	5789.61	4385	6223.84	4385	5533.53	4385	6231.26
878	430.913	878	1619.01	4390	1677.5	4390	3935.82	4390	4557.47	4390	4989.83	4390	5791.47	4390	6225.69	4390	5535.39	4390	6233.11
879	430.335	879	1618.56	4395	1677.5	4395	3937.68	4395	4553.75	4395	4973.13	4395	5795.18	4395	6221.98	4395	5531.68	4395	6236.82
880	429.779	880	1618.06	4400	1671.94	4400	3937.68	4400	4557.47	4400	4956.43	4400	5793.33	4400	6216.41	4400	5531.68	4400	6233.11
881	429.244	881	1617.53	4405	1671.94	4405	3939.54	4405	4557.47	4405	4949.01	4405	5795.18	4405	6218.27	4405	5533.53	4405	6233.11
882	428.735	882	1616.95	4410	1673.79	4410	3943.25	4410	4561.18	4410	4947.15	4410	5797.04	4410	6220.12	4410	5533.53	4410	6234.97
883	428.251	883	1616.32	4415	1671.94	4415	3943.25	4415	4559.32	4415	4954.57	4415	5795.18	4415	6218.27	4415	5537.25	4415	6234.97
884	427.794	884	1615.63	4420	1673.79	4420	3941.39	4420	4559.32	4420	4971.27	4420	5797.04	4420	6220.12	4420	5537.25	4420	6238.68
885	427.367	885	1614.87	4425	1675.65	4425	3941.39	4425	4559.32	4425	4989.83	4425	5795.18	4425	6220.12	4425	5537.25	4425	6233.11
886	426.972	886	1614.03	4430	1677.5	4430	3939.54	4430	4555.61	4430	5015.81	4430	5795.18	4430	6218.27	4430	5539.1	4430	6236.82
887	426.61	887	1613.11	4435	1679.36	4435	3937.68	4435	4555.61	4435	5032.51	4435	5798.89	4435	6220.12	4435	5535.39	4435	6236.82
888	426.282	888	1612.1	4440	1681.21	4440	3932.11	4440	4553.75	4440	5045.5	4440	5800.75	4440	6218.27	4440	5537.25	4440	6236.82
889	425.991	889	1610.97	4445	1683.07	4445	3930.26	4445	4555.61	4445	5051.07	4445	5800.75	4445	6223.84	4445	5539.1	4445	6238.68
890	425.739	890	1609.73	4450	1684.93	4450	3928.4	4450	4555.61	4450	5047.36	4450	5797.04	4450	6221.98	4450	5537.25	4450	6246.1
891	425.527	891	1608.37	4455	1690.49	4455	3928.4	4455	4553.75	4455	5047.36	4455	5795.18	4455	6218.27	4455	5539.1	4455	6238.68
892	425.358	892	1606.86	4460	1688.64	4460	3930.26	4460	4551.9	4460	5045.5	4460	5793.33	4460	6216.41	4460	5540.96	4460	6238.68
893	425.233	893	1605.19	4465	1686.78	4465	3928.4	4465	4551.9	4465	5043.64	4465	5787.76	4465	6218.27	4465	5539.1	4465	6233.11
894	425.154	894	1603.35	4470	1686.78	4470	3928.4	4470	4555.61	4470	5047.36	4470	5789.61	4470	6218.27	4470	5533.53	4470	6233.11
895	425.124	895	1601.33	4475	1683.07	4475	3926.55	4475	4551.9	4475	5051.07	4475	5791.47	4475	6220.12	4475	5535.39	4475	6236.82
896	425.143	896	1599.1	4480	1684.93	4480	3926.55	4480	4551.9	4480	5049.21	4480	5789.61	4480	6214.56	4480	5535.39	4480	6236.82
897	425.214	897	1596.65	4485	1686.78	4485	3926.55	4485	4550.04	4485	5051.07	4485	5795.18	4485	6218.27	4485	5535.39	4485	6240.54
898	425.338	898	1593.95	4490	1688.64	4490	3928.4	4490	4551.9	4490	5054.78	4490	5795.18	4490	6220.12	4490	5535.39	4490	6236.82
899	425.519	899	1591	4495	1688.64	4495	3926.55	4495	4551.9	4495	5056.63	4495	5791.47	4495	6216.41	4495	5539.1	4495	6242.39
900	425.756	900	1587.77	4500	1688.64	4500	3928.4	4500	4551.9	4500	5062.2	4500	5793.33	4500	6216.41	4500	5537.25	4500	6244.25
				4505	1690.49	4505	3930.26	4505	4548.19	4505	5060.35	4505	5795.18	4505	6214.56	4505	5539.1	4505	6244.25
				4510	1690.49	4510	3932.11	4510	4550.04	4510	5069.62	4510	5795.18	4510	6216.41	4510	5539.1	4510	6244.25
				4515	1692.35	4515	3933.97	4515	4550.04	4515	5077.05	4515	5798.89	4515	6216.41	4515	5539.1	4515	6246.1
				4520	1690.49	4520	3932.11	4520	4551.9	4520	5078.9	4520	5797.04	4520	6216.41	4520	5539.1	4520	6249.81
				4525	1690.49	4525	3933.97	4525	4550.04	4525	5084.47	4525	5798.89	4525	6212.7	4525	5540.96	4525	6251.67
				4530	1690.49	4530	3937.68	4530	4550.04	4530	5082.61	4530	5797.04	4530	6216.41	4530	5539.1	4530	6255.38
				4535	1690.49	4535	3939.54	4535	4550.04	4535	5078.9	4535	5793.33	4535	6218.27	4535	5542.81	4535	6257.24
				4540	1690.49	4540	3941.39	4540	4544.48	4540	5077.05	4540	5795.18	4540	6220.12	4540	5540.96	4540	6253.53
				4545	1686.78	4545	3937.68	4545	4544.48	4545	5073.33	4545	5797.04	4545	6220.12	4545	5544.67	4545	6259.09
				4550	1686.78	4550	3935.82	4550	4542.62	4550	5067.77	4550	5797.04	4550	6221.98	4550	5546.52	4550	6257.24
				4555	1686.78	4555	3933.97	4555	4542.62	4555	5062.2	4555	5797.04	4555	6221.98	4555	5542.81	4555	6260.95
				4560	1688.64	4560	3935.82	4560	4544.48	4560	5060.35	4560	5798.89	4560	6221.98	4560	5542.81	4560	6257.24
				4565	1686.78	4565	3935.82	4565	4540.76	4565	5062.2	4565	5798.89	4565	6221.98	4565	5546.52	4565	6257.24
				4570	1683.07	4570	3937.68	4570	4544.48	4570	5056.63	4570	5797.04	4570	6221.98	4570	5544.67	4570	6257.24
				4575	1684.93	4575	3937.68	4575	4544.48	4575	5060.35	4575	5797.04	4575	6221.98	4575	5548.38	4575	6264.66
				4580	1684.93	4580	3937.68	4580	4544.48	4580	5060.35	4580	5798.89	4580	6225.69	4580	5548.38	4580	6273.94
				4585	1686.78	4585	3939.54	4585	4542.62	4585	5062.2	4585	5806.31	4585	6223.84	4585	5548.38	4585	6283.22
				4590	1686.78	4590	3941.39	4590	4542.62	4590	5062.2	4590	5806.31	4590	6227.55	4590	5550.24	4590	6283.22
				4595	1684.93	4595	3941.39	4595	4542.62	4595	5062.2	4595	5810.03	4595	6229.4	4595	5553.95	4595	6277.65
				4600	1681.21	4600	3937.68	4600	4538.91	4600	5067.77	4600	5808.17	4600	6231.26	4600	5555.8	4600	6281.36
				4605	1683.07	4605	3941.39	4605	4544.48	4605	5069.62	4605	5804.46	4605	6231.26	4605	5555.8	4605	6286.93
				4610	1683.07	4610	3937.68	4610	4540.76	4610	5073.33	4610	5800.75	4610	6229.4	4610	5557.66	4610	6288.78
				4615	1683.07	4615	3937.68	4615	4542.62	4615	5077.05	4615	5800.75	4615	6229.4	4615	5563.23	4615	6296.21
				4620	1684.93	4620	3937.68	4620	4544.48	4620	5077.05	4620	5802.6	4620	6225.69	4620	5563.23	4620	6298.06
				4625	1683.07	4625	3939.54	4625	4544.48	4625	5067.77	4625	5802.6	4625	6221.98	4625	5563.23	4625	6309.19
				4630	1683.07	4630	3941.39	4630	4540.76	4630	5056.63	4630	5804.46	4630	6221.98	4630	5559.51	4630	6311.05
				4635	1683.07	4635	3939.54	4635	4537.05	4635	5051.07	4635	5808.17	4635	6225.69	4635	5561.37	4635	6299.92
				4640	1681.21	4640	3941.39	4640	4538.91	4640	5043.64	4640	5804.46	4640	6225.69	4640	5555.8	4640	6298.06
				4645	1681.21	4645	3941.39	4645	4540.76	4645	5036.22	4645	5804.46	4645	6223.84	4645	5553.95	4645	6296.21
				4650	1683.07	4650	3941.39	4650	4542.62	4650	5030.65	4650	5800.75	4650	6225.69	4650	5557.66	4650	6296.21
				4655	1686.78	4655	3941.39	4655	4538.91	4655	5025.09	4655	5804.46	4655	6223.84	4655	5555.8	4655	6298.06
				4660	1688.64	4660	3939.54	4660	4537.05	4660	5026.94	4660	5804.46	4660	6225.69	4660	5553.95	4660	6298.06
				4665	1690.49	4665	3935.82	4665	4537.05	4665	5028.8	4665	5806.31	4665	6225.69	4665	5553.95	4665	6301.77
				4670	1688.64	4670	3928.4	4670	4537.05	4670	5030.65	4670	5804.46	4670	6225.69	4670	5553.95	4670	6305.48
				4675	1690.49	4675	3926.55	4675	4537.05	4675	5034.37	4675	5804.46	4675	6229.4	4675	5555.8	4675	6309.19
				4680	1692.35	4680	3920.98	4680	4533.34	4680	5036.22	4680	5802.6	4680	6229.4	4680	5553.95	4680	6307.34
				4685	1701.63	4685	3919.12	4685	4533.34	4685	5032.51	4685	5802.6	4685	6229.4	4685	5555.8	4685	6303.63
				4690	1707.19	4690	3911.7	4690	4533.34	4690	5019.52	4690	5798.89	4690	6225.69	4690	5553.95	4690	6303.63
				4695	1701.63	4695	3906.13	4695	4535.2	4695	5004.68	4695	5798.89	4695	6225.69	4695	5559.51	4695	6303.63
				4700	1696.06	4700	3900.57	4700	4535.2	4700	4989.83	4700	5800.75	4700	6223.84	4700	5557.66	4700	6309.19
				4705	1694.2	4705	3895	4705	4535.2	4705	4967.56	4705	5798.89	4705	6225.69	4705	5561.37	4705	6314.76
				4710	1692.35	4710	3889.43	4710	4531.49	4710	4954.57	4710	5804.46	4710	6223.84	4710	5563.23	4710	6314.76
				4715	1692.35	4715	3889.43	4715	4529.63	4715	4950.86	4715	5800.75	4715	6225.69	4715	5563.23	4715	6314.76
				4720	1690.49	4720	3893.14	4720	4525.92	4720	4952.72	4720	5800.75	4720	6231.26	4720	5563.23	4720	6312.91
				4725	1692.35	4725	3898.71	4725	4524.06	4725	4963.85	4725	5800.75	4725	6229.4	4725	5561.37	4725	6314.76
				4730	1696.06	4730	3904.28	4730	4524.06	4730	4984.26	4730	5798.89	4730	6231.26	4730	5565.08	4730	6312.91
				4735	1696.06	4735	3907.99	4735	4522.21	4735	5000.96	4735	5800.75	4735	6229.4	4735	5568.79	4735	6316.62
				4740	1694.2	4740	3913.56	4740	4525.92	4740	5012.1	4740	5802.6	4740	6229.4	4740	5566.94	4740	6322.18
				4745	1694.2	4745	3922.83	4745	4524.06	4745	5021.38	4745	5802.6	4745	6234.97	4745	5568.79	4745	6325.9
				4750	1692.35	4750	3928.4	4750	4524.06	4750	5017.67	4750	5800.75	4750	6234.97	4750	5570.65	4750	6333.32
				4755	1694.2	4755	3933.97	4755	4524.06	4755	5006.53	4755	5802.6	4755	6242.39	4755	5576.21	4755	6329.61
				4760	1694.2	4760	3933.97	4760	4524.06	4760	4995.4	4760	5802.6	4760	6240.54	4760	5574.36	4760	6333.32
				4765	1697.92	4765	3932.11	4765	4522.21	4765	4982.41	4765	5802.6	4765	6242.39	4765	5572.5	4765	6331.46
				4770	1699.77	4770	3932.11	4770	4524.06	4770	4969.42	4770	5802.6	4770	6246.1	4770	5576.21	4770	6333.32
				4775	1701.63	4775	3930.26	4775	4522.21	4775	4963.85	4775	5802.6	4775	6246.1	4775	5579.93	4775	6331.46
				4780	1699.77	4780	3932.11	4780	4522.21	4780	4960.14	4780	5802.6	4780	6247.96	4780	5578.07	4780	6333.32
				4785	1703.48	4785	3930.26	4785	4522.21	4785	4958.28	4785	5802.6	4785	6247.96	4785	5579.93	4785	6340.74
				4790	1707.19	4790	3926.55	4790	4522.21	4790	4960.14	4790	5810.03	4790	6247.96	4790	5581.78	4790	6333.32
				4795	1705.34	4795	3919.12	4795	4522.21	4795	4963.85	4795	5808.17	4795	6246.1	4795	5585.49	4795	6333.32
				4800	1703.48	4800	3915.41	4800	4520.35	4800	4967.56	4800	5808.17	4800	6249.81	4800	5585.49	4800	6335.17
				4805	1697.92	4805	3911.7	4805	4522.21	4805	4982.41	4805	5808.17	4805	6244.25	4805	5585.49	4805	6335.17
				4810	1683.07	4810	3907.99	4810	4522.21	4810	4991.69	4810	5810.03	4810	6246.1	4810	5587.35	4810	6335.17
				4815	1658.95	4815	3904.28	4815	4516.64	4815	4999.11	4815	5811.88	4815	6244.25	4815	5583.64	4815	6340.74
				4820	1638.53	4820	3904.28	4820	4512.93	4820	5008.39	4820	5810.03	4820	6240.54	4820	5585.49	4820	6342.6
				4825	1618.12	4825	3904.28	4825	4514.79	4825	5015.81	4825	5813.74	4825	6246.1	4825	5589.2	4825	6346.31
				4830	1608.84	4830	3902.42	4830	4511.07	4830	5012.1	4830	5815.59	4830	6242.39	4830	5587.35	4830	6350.02
				4835	1610.7	4835	3902.42	4835	4514.79	4835	5008.39	4835	5813.74	4835	6244.25	4835	5589.2	4835	6351.87
				4840	1619.98	4840	3906.13	4840	4512.93	4840	5000.96	4840	5815.59	4840	6246.1	4840	5589.2	4840	6351.87
				4845	1632.97	4845	3907.99	4845	4514.79	4845	4984.26	4845	5817.45	4845	6246.1	4845	5591.06	4845	6350.02
				4850	1657.09	4850	3907.99	4850	4514.79	4850	4963.85	4850	5813.74	4850	6244.25	4850	5591.06	4850	6353.73
				4855	1675.65	4855	3909.85	4855	4512.93	4855	4945.3	4855	5813.74	4855	6249.81	4855	5592.92	4855	6348.16
				4860	1690.49	4860	3909.85	4860	4512.93	4860	4924.88	4860	5811.88	4860	6247.96	4860	5594.77	4860	6348.16
				4865	1696.06	4865	3911.7	4865	4512.93	4865	4900.76	4865	5811.88	4865	6246.1	4865	5598.48	4865	6348.16
				4870	1701.63	4870	3913.56	4870	4512.93	4870	4887.77	4870	5813.74	4870	6247.96	4870	5602.19	4870	6350.02
				4875	1701.63	4875	3913.56	4875	4516.64	4875	4885.91	4875	5813.74	4875	6249.81	4875	5604.05	4875	6351.87
				4880	1701.63	4880	3911.7	4880	4511.07	4880	4887.77	4880	5813.74	4880	6249.81	4880	5604.05	4880	6353.73
				4885	1699.77	4885	3911.7	4885	4512.93	4885	4897.05	4885	5817.45	4885	6253.53	4885	5602.19	4885	6353.73
				4890	1701.63	4890	3911.7	4890	4512.93	4890	4919.32	4890	5821.16	4890	6249.81	4890	5605.91	4890	6355.59
				4895	1697.92	4895	3915.41	4895	4512.93	4895	4937.87	4895	5821.16	4895	6253.53	4895	5604.05	4895	6361.15
				4900	1697.92	4900	3915.41	4900	4512.93	4900	4956.43	4900	5821.16	4900	6255.38	4900	5602.19	4900	6361.15
				4905	1699.77	4905	3913.56	4905	4509.22	4905	4965.71	4905	5823.02	4905	6257.24	4905	5600.34	4905	6357.44
				4910	1699.77	4910	3911.7	4910	4511.07	4910	4978.7	4910	5821.16	4910	6251.67	4910	5600.34	4910	6353.73
				4915	1701.63	4915	3915.41	4915	4511.07	4915	4986.12	4915	5823.02	4915	6255.38	4915	5604.05	4915	6357.44
				4920	1699.77	4920	3913.56	4920	4509.22	4920	4993.54	4920	5823.02	4920	6251.67	4920	5607.76	4920	6353.73
				4925	1703.48	4925	3915.41	4925	4511.07	4925	4999.11	4925	5823.02	4925	6253.53	4925	5607.76	4925	6353.73
				4930	1703.48	4930	3913.56	4930	4511.07	4930	4999.11	4930	5823.02	4930	6262.8	4930	5609.62	4930	6350.02
				4935	1703.48	4935	3915.41	4935	4509.22	4935	4989.83	4935	5823.02	4935	6257.24	4935	5605.91	4935	6353.73
				4940	1703.48	4940	3913.56	4940	4505.51	4940	4984.26	4940	5821.16	4940	6262.8	4940	5609.62	4940	6353.73
				4945	1701.63	4945	3913.56	4945	4503.65	4945	4969.42	4945	5819.3	4945	6260.95	4945	5609.62	4945	6359.3
				4950	1699.77	4950	3913.56	4950	4501.8	4950	4936.02	4950	5823.02	4950	6259.09	4950	5607.76	4950	6361.15
				4955	1699.77	4955	3913.56	4955	4503.65	4955	4885.91	4955	5823.02	4955	6262.8	4955	5609.62	4955	6366.72
				4960	1701.63	4960	3913.56	4960	4499.94	4960	4837.67	4960	5823.02	4960	6266.51	4960	5611.47	4960	6372.29
				4965	1703.48	4965	3913.56	4965	4498.08	4965	4776.43	4965	5824.87	4965	6264.66	4965	5611.47	4965	6374.14
				4970	1703.48	4970	3913.56	4970	4494.37	4970	4730.04	4970	5826.73	4970	6262.8	4970	5611.47	4970	6366.72
				4975	1701.63	4975	3911.7	4975	4496.23	4975	4692.93	4975	5826.73	4975	6264.66	4975	5611.47	4975	6363.01
				4980	1703.48	4980	3911.7	4980	4492.52	4980	4670.66	4980	5826.73	4980	6264.66	4980	5609.62	4980	6363.01
				4985	1701.63	4985	3909.85	4985	4496.23	4985	4676.23	4985	5826.73	4985	6268.37	4985	5609.62	4985	6368.58
				4990	1699.77	4990	3907.99	4990	4496.23	4990	4713.34	4990	5828.58	4990	6268.37	4990	5611.47	4990	6372.29
				4995	1701.63	4995	3909.85	4995	4496.23	4995	4761.59	4995	5828.58	4995	6266.51	4995	5611.47	4995	6374.14
				5000	1705.34	5000	3907.99	5000	4496.23	5000	4794.99	5000	5828.58	5000	6262.8	5000	5613.33	5000	6374.14
				5005	1703.48	5005	3909.85	5005	4496.23	5005	4802.41	5005	5828.58	5005	6266.51	5005	5613.33	5005	6374.14
				5010	1701.63	5010	3913.56	5010	4499.94	5010	4761.59	5010	5828.58	5010	6262.8	5010	5615.18	5010	6379.71
				5015	1699.77	5015	3913.56	5015	4498.08	5015	4694.78	5015	5830.44	5015	6262.8	5015	5613.33	5015	6376
				5020	1703.48	5020	3915.41	5020	4496.23	5020	4629.84	5020	5828.58	5020	6266.51	5020	5615.18	5020	6381.56
				5025	1709.05	5025	3915.41	5025	4496.23	5025	4576.02	5025	5826.73	5025	6266.51	5025	5617.04	5025	6374.14
				5030	1712.76	5030	3913.56	5030	4494.37	5030	4564.89	5030	5826.73	5030	6266.51	5030	5615.18	5030	6376
				5035	1707.19	5035	3913.56	5035	4494.37	5035	4594.58	5035	5826.73	5035	6268.37	5035	5615.18	5035	6379.71
				5040	1701.63	5040	3911.7	5040	4496.23	5040	4665.09	5040	5828.58	5040	6268.37	5040	5618.89	5040	6379.71
				5045	1697.92	5045	3907.99	5045	4496.23	5045	4765.3	5045	5830.44	5045	6270.23	5045	5618.89	5045	6381.56
				5050	1696.06	5050	3906.13	5050	4494.37	5050	4865.5	5050	5830.44	5050	6270.23	5050	5618.89	5050	6377.85
				5055	1701.63	5055	3904.28	5055	4496.23	5055	4945.3	5055	5830.44	5055	6266.51	5055	5622.61	5055	6374.14
				5060	1703.48	5060	3902.42	5060	4496.23	5060	4986.12	5060	5830.44	5060	6268.37	5060	5624.46	5060	6376
				5065	1707.19	5065	3902.42	5065	4492.52	5065	5000.96	5065	5832.29	5065	6268.37	5065	5624.46	5065	6377.85
				5070	1705.34	5070	3902.42	5070	4494.37	5070	4991.69	5070	5830.44	5070	6270.23	5070	5620.75	5070	6376
				5075	1703.48	5075	3898.71	5075	4492.52	5075	4976.84	5075	5832.29	5075	6270.23	5075	5624.46	5075	6377.85
				5080	1705.34	5080	3896.86	5080	4492.52	5080	4969.42	5080	5832.29	5080	6268.37	5080	5624.46	5080	6381.56
				5085	1703.48	5085	3896.86	5085	4492.52	5085	4978.7	5085	5836.01	5085	6273.94	5085	5628.17	5085	6383.42
				5090	1705.34	5090	3898.71	5090	4496.23	5090	4995.4	5090	5836.01	5090	6275.79	5090	5633.74	5090	6387.13
				5095	1709.05	5095	3898.71	5095	4496.23	5095	5021.38	5095	5837.86	5095	6275.79	5095	5633.74	5095	6387.13
				5100	1707.19	5100	3902.42	5100	4492.52	5100	5038.08	5100	5837.86	5100	6277.65	5100	5628.17	5100	6383.42
				5105	1707.19	5105	3902.42	5105	4494.37	5105	5052.92	5105	5839.72	5105	6273.94	5105	5624.46	5105	6385.28
				5110	1703.48	5110	3906.13	5110	4494.37	5110	5054.78	5110	5837.86	5110	6275.79	5110	5622.61	5110	6381.56
				5115	1705.34	5115	3906.13	5115	4490.66	5115	5056.63	5115	5837.86	5115	6272.08	5115	5622.61	5115	6383.42
				5120	1705.34	5120	3915.41	5120	4488.81	5120	5047.36	5120	5839.72	5120	6275.79	5120	5626.32	5120	6385.28
				5125	1705.34	5125	3915.41	5125	4488.81	5125	5039.93	5125	5839.72	5125	6270.23	5125	5630.03	5125	6387.13
				5130	1709.05	5130	3915.41	5130	4485.1	5130	5026.94	5130	5839.72	5130	6275.79	5130	5631.88	5130	6390.84
				5135	1710.91	5135	3915.41	5135	4486.95	5135	5010.24	5135	5841.57	5135	6272.08	5135	5635.6	5135	6392.7
				5140	1707.19	5140	3915.41	5140	4481.38	5140	4984.26	5140	5839.72	5140	6277.65	5140	5641.16	5140	6394.55
				5145	1707.19	5145	3911.7	5145	4477.67	5145	4954.57	5145	5837.86	5145	6277.65	5145	5646.73	5145	6385.28
				5150	1705.34	5150	3906.13	5150	4477.67	5150	4921.17	5150	5841.57	5150	6277.65	5150	5657.86	5150	6385.28
				5155	1703.48	5155	3902.42	5155	4475.82	5155	4906.33	5155	5839.72	5155	6277.65	5155	5661.57	5155	6390.84
				5160	1703.48	5160	3902.42	5160	4479.53	5160	4897.05	5160	5841.57	5160	6279.5	5160	5654.15	5160	6396.41
				5165	1703.48	5165	3904.28	5165	4481.38	5165	4906.33	5165	5839.72	5165	6279.5	5165	5646.73	5165	6394.55
				5170	1703.48	5170	3904.28	5170	4481.38	5170	4919.32	5170	5847.14	5170	6283.22	5170	5644.87	5170	6388.99
				5175	1703.48	5175	3902.42	5175	4479.53	5175	4941.58	5175	5847.14	5175	6281.36	5175	5644.87	5175	6388.99
				5180	1705.34	5180	3902.42	5180	4481.38	5180	4960.14	5180	5845.28	5180	6285.07	5180	5646.73	5180	6390.84
				5185	1701.63	5185	3900.57	5185	4483.24	5185	4987.98	5185	5845.28	5185	6283.22	5185	5654.15	5185	6388.99
				5190	1705.34	5190	3896.86	5190	4481.38	5190	5017.67	5190	5845.28	5190	6285.07	5190	5661.57	5190	6388.99
				5195	1703.48	5195	3895	5195	4481.38	5195	5043.64	5195	5843.43	5195	6286.93	5195	5656.01	5195	6392.7
				5200	1703.48	5200	3896.86	5200	4481.38	5200	5071.48	5200	5843.43	5200	6283.22	5200	5652.3	5200	6390.84
				5205	1703.48	5205	3898.71	5205	4481.38	5205	5091.89	5205	5843.43	5205	6283.22	5205	5650.44	5205	6390.84
				5210	1703.48	5210	3900.57	5210	4477.67	5210	5108.59	5210	5843.43	5210	6285.07	5210	5648.58	5210	6392.7
				5215	1707.19	5215	3900.57	5215	4481.38	5215	5119.73	5215	5845.28	5215	6281.36	5215	5652.3	5215	6392.7
				5220	1707.19	5220	3902.42	5220	4479.53	5220	5123.44	5220	5847.14	5220	6283.22	5220	5652.3	5220	6396.41
				5225	1705.34	5225	3902.42	5225	4481.38	5225	5121.58	5225	5847.14	5225	6283.22	5225	5654.15	5225	6396.41
				5230	1705.34	5230	3906.13	5230	4483.24	5230	5123.44	5230	5850.85	5230	6285.07	5230	5650.44	5230	6400.12
				5235	1707.19	5235	3906.13	5235	4486.95	5235	5125.29	5235	5852.71	5235	6286.93	5235	5654.15	5235	6401.98
				5240	1705.34	5240	3907.99	5240	4486.95	5240	5121.58	5240	5854.56	5240	6286.93	5240	5656.01	5240	6405.69
				5245	1703.48	5245	3906.13	5245	4485.1	5245	5116.01	5245	5856.42	5245	6288.78	5245	5659.72	5245	6414.97
				5250	1703.48	5250	3902.42	5250	4481.38	5250	5104.88	5250	5856.42	5250	6286.93	5250	5663.43	5250	6414.97
				5255	1703.48	5255	3904.28	5255	4477.67	5255	5099.31	5255	5854.56	5255	6288.78	5255	5661.57	5255	6418.68
				5260	1701.63	5260	3902.42	5260	4475.82	5260	5093.75	5260	5852.71	5260	6288.78	5260	5659.72	5260	6416.82
				5265	1701.63	5265	3898.71	5265	4475.82	5265	5088.18	5265	5856.42	5265	6290.64	5265	5661.57	5265	6414.97
				5270	1701.63	5270	3898.71	5270	4477.67	5270	5090.04	5270	5858.27	5270	6290.64	5270	5661.57	5270	6424.24
				5275	1701.63	5275	3895	5275	4475.82	5275	5103.03	5275	5856.42	5275	6290.64	5275	5665.29	5275	6426.1
				5280	1701.63	5280	3895	5280	4477.67	5280	5114.16	5280	5858.27	5280	6294.35	5280	5659.72	5280	6424.24
				5285	1703.48	5285	3891.29	5285	4479.53	5285	5125.29	5285	5860.13	5285	6292.49	5285	5659.72	5285	6426.1
				5290	1705.34	5290	3893.14	5290	4481.38	5290	5125.29	5290	5860.13	5290	6292.49	5290	5657.86	5290	6427.96
				5295	1705.34	5295	3891.29	5295	4479.53	5295	5129	5295	5858.27	5295	6292.49	5295	5659.72	5295	6431.67
				5300	1705.34	5300	3889.43	5300	4477.67	5300	5130.86	5300	5863.84	5300	6290.64	5300	5659.72	5300	6429.81
				5305	1703.48	5305	3891.29	5305	4481.38	5305	5134.57	5305	5861.98	5305	6294.35	5305	5661.57	5305	6431.67
				5310	1703.48	5310	3891.29	5310	4477.67	5310	5134.57	5310	5861.98	5310	6290.64	5310	5663.43	5310	6433.52
				5315	1699.77	5315	3891.29	5315	4477.67	5315	5125.29	5315	5861.98	5315	6292.49	5315	5661.57	5315	6433.52
				5320	1699.77	5320	3895	5320	4477.67	5320	5123.44	5320	5861.98	5320	6296.21	5320	5665.29	5320	6429.81
				5325	1701.63	5325	3898.71	5325	4481.38	5325	5116.01	5325	5860.13	5325	6298.06	5325	5669	5325	6427.96
				5330	1699.77	5330	3900.57	5330	4481.38	5330	5114.16	5330	5861.98	5330	6299.92	5330	5669	5330	6427.96
				5335	1699.77	5335	3900.57	5335	4477.67	5335	5108.59	5335	5861.98	5335	6298.06	5335	5669	5335	6431.67
				5340	1697.92	5340	3902.42	5340	4475.82	5340	5106.74	5340	5860.13	5340	6296.21	5340	5669	5340	6431.67
				5345	1701.63	5345	3902.42	5345	4475.82	5345	5104.88	5345	5861.98	5345	6298.06	5345	5672.71	5345	6433.52
				5350	1703.48	5350	3904.28	5350	4472.11	5350	5104.88	5350	5858.27	5350	6299.92	5350	5672.71	5350	6435.38
				5355	1709.05	5355	3904.28	5355	4473.96	5355	5103.03	5355	5860.13	5355	6301.77	5355	5674.56	5355	6440.95
				5360	1714.62	5360	3904.28	5360	4472.11	5360	5101.17	5360	5860.13	5360	6305.48	5360	5676.42	5360	6442.8
				5365	1710.91	5365	3904.28	5365	4472.11	5365	5104.88	5365	5858.27	5365	6307.34	5365	5678.28	5365	6446.51
				5370	1707.19	5370	3906.13	5370	4473.96	5370	5108.59	5370	5858.27	5370	6307.34	5370	5680.13	5370	6448.37
				5375	1707.19	5375	3904.28	5375	4473.96	5375	5112.3	5375	5854.56	5375	6314.76	5375	5678.28	5375	6448.37
				5380	1707.19	5380	3902.42	5380	4473.96	5380	5112.3	5380	5856.42	5380	6311.05	5380	5680.13	5380	6448.37
				5385	1710.91	5385	3900.57	5385	4472.11	5385	5112.3	5385	5854.56	5385	6312.91	5385	5680.13	5385	6452.08
				5390	1707.19	5390	3900.57	5390	4470.25	5390	5121.58	5390	5854.56	5390	6316.62	5390	5680.13	5390	6455.79
				5395	1705.34	5395	3900.57	5395	4468.39	5395	5123.44	5395	5852.71	5395	6312.91	5395	5681.99	5395	6455.79
				5400	1703.48	5400	3896.86	5400	4468.39	5400	5125.29	5400	5848.99	5400	6312.91	5400	5685.7	5400	6452.08

## Sheet: PVKdac kinetics 3.2 ppm SWCNTs 
Time(s)	qt (µg/g)	Time(s)	qt (mg/g)	Time(s)	qt (mg/g)	Time(s)	qt (mg/g)	Time(s)	qt (mg/g)	Time(s)	qt (mg/g)	Time(s)	qt (mg/g)
ppm of PVKdac	69.44		79.36		91.2		88		96		99.648		69.44
PVKdac:SWCNT stoichiometry	21.7:1		24.8:1		28.5:1		27.5:1		30:1		31.1:1		33.9:1
0	0	0	0	0	0	0	0	0	0	0	0	0	0
5	622.603	5	1603.82	5	1997.31	5	2844.05	5	3631.02	5	3167.8	5	4413.01
10	1130.65	10	2829.11	10	3650.94	10	5015.69	10	5608.41	10	5055.53	10	6724.11
15	1593.86	15	3815.31	15	4861.28	15	6499.97	15	7545.95	15	6504.95	15	8143.64
20	2022.21	20	3865.12	20	5613.39	20	7580.81	20	8821.04	20	7590.77	20	9010.31
25	2415.7	25	5100.36	25	6156.3	25	8552.07	25	9324.1	25	8382.72	25	9647.85
30	2754.39	30	5907.26	30	6724.11	30	9508.39	30	10240.6	30	8995.37	30	9563.18
35	3103.05	35	6395.38	35	7267.02	35	10464.7	35	11246.7	35	9672.76	35	8960.5
40	3411.86	40	6913.38	40	7655.52	40	11186.9	40	11904.2	40	10295.4	40	8562.03
45	3655.92	45	7466.25	45	8034.07	45	11794.6	45	12452.1	45	10788.5	45	8751.3
50	3904.96	50	7824.87	50	8352.84	50	12292.7	50	12925.2	50	11291.5	50	9423.72
55	4154.01	55	8053.99	55	8616.82	55	12790.8	55	13368.5	55	11764.7	55	9931.76
60	4373.16	60	8462.42	60	8860.88	60	13229.1	60	13801.9	60	12138.3	60	10230.6
65	4597.3	65	8835.98	65	9124.87	65	13597.6	65	14160.5	65	12452.1	65	10439.8
70	4816.46	70	9169.69	70	9403.79	70	13946.3	70	14454.3	70	12750.9	70	10688.8
75	5010.71	75	9398.81	75	9697.66	75	14265.1	75	14733.3	75	13034.8	75	10962.8
80	5190.02	80	9548.24	80	9966.63	80	14554	80	14992.3	80	13313.7	80	11520.6
85	5369.33	85	9767.39	85	10225.6	85	14798	85	15226.4	85	13592.7	85	12437.1
90	5538.67	90	9981.57	90	10434.8	90	15047.1	90	15455.5	90	13866.6	90	13438.3
95	5688.1	95	10225.6	95	10634.1	95	15271.2	95	15694.6	95	14135.6	95	14140.6
100	5842.5	100	10564.3	100	10853.2	100	15495.3	100	15918.7	100	14329.8	100	14663.5
105	5972.01	105	10783.5	105	11067.4	105	15679.6	105	16207.6	105	14494.2	105	15057
110	6091.55	110	10977.7	110	11266.6	110	15863.9	110	16496.5	110	14643.6	110	15390.7
115	6196.14	115	11157	115	11406.1	115	16038.2	115	16705.7	115	14728.3	115	15664.7
120	6295.76	120	11356.3	120	11545.5	120	16202.6	120	16964.7	120	14827.9	120	15888.8
125	6415.3	125	11540.6	125	11695	125	16372	125	17268.5	125	14957.4	125	16108
130	6524.88	130	11650.1	130	11824.5	130	16526.4	130	17313.3	130	15126.8	130	16322.2
135	6634.46	135	11754.7	135	11949	135	16680.8	135	17512.6	135	15281.2	135	16541.3
140	6739.05	140	11894.2	140	12063.6	140	16825.2	140	17716.8	140	15435.6	140	16705.7
145	6853.61	145	12008.8	145	12153.2	145	16959.7	145	17846.3	145	15599.9	145	16845.1
150	6938.29	150	12148.2	150	12247.8	150	17074.3	150	18035.6	150	15779.2	150	16949.7
155	7037.9	155	12237.9	155	12332.5	155	17163.9	155	18219.8	155	15933.7	155	17024.5
160	7147.48	160	12342.5	160	12442.1	160	17253.6	160	18349.3	160	16068.1	160	17049.4
165	7262.04	165	12437.1	165	12616.4	165	17363.1	165	18533.6	165	16242.5	165	17069.3
170	7371.62	170	12541.7	170	12736	170	17472.7	170	18693	170	16396.9	170	17089.2
175	7501.12	175	12631.4	175	12810.7	175	17582.3	175	18837.5	175	16591.1	175	17144
180	7615.68	180	12745.9	180	12880.4	180	17696.9	180	18817.5	180	16735.6	180	17223.7
185	7705.33	185	12850.5	185	12970.1	185	17801.5	185	18817.5	185	16825.2	185	17313.3
190	7785.03	190	12950.1	190	13089.6	190	17886.1	190	18902.2	190	16894.9	190	17408
195	7844.8	195	12990	195	13229.1	195	17960.8	195	18942.1	195	17009.5	195	17567.4
200	7894.6	200	13009.9	200	13348.6	200	18025.6	200	19056.6	200	17129	200	17776.6
205	7929.47	205	13059.7	205	13453.2	205	18090.3	205	19056.6	205	17228.7	205	18000.7
210	7969.32	210	13144.4	210	13562.8	210	18155.1	210	19101.5	210	17333.3	210	18209.9
215	8009.16	215	13249	215	13667.4	215	18229.8	215	19260.8	215	17408	215	18468.9
220	8073.91	220	13393.4	220	13772	220	18324.4	220	19380.4	220	17502.6	220	18717.9
225	8128.7	225	13527.9	225	13826.8	225	18409.1	225	19440.1	225	17592.3	225	18927.1
230	8198.43	230	13587.7	230	13831.7	230	18503.8	230	19509.9	230	17676.9	230	19111.4
235	8258.2	235	13677.3	235	13836.7	235	18588.4	235	19554.7	235	17746.7	235	19280.8
240	8317.97	240	13831.7	240	13876.6	240	18673.1	240	19624.4	240	17796.5	240	19460.1
245	8367.78	245	13861.6	245	13946.3	245	18737.9	245	19729	245	17846.3	245	19654.3
250	8432.53	250	13916.4	250	14036	250	18797.6	250	19823.7	250	17886.1	250	19828.7
255	8492.3	255	14001.1	255	14135.6	255	18852.4	255	19913.3	255	17960.8	255	19988
260	8567.01	260	13996.1	260	14205.3	260	18907.2	260	19988	260	18040.5	260	20087.7
265	8636.75	265	14026	265	14275	265	18972	265	20027.9	265	18120.2	265	20152.4
270	8711.46	270	14165.5	270	14324.8	270	19026.7	270	20057.8	270	18194.9	270	20237.1
275	8786.17	275	14245.2	275	14384.6	275	19081.5	275	20097.6	275	18249.7	275	20306.8
280	8855.9	280	14260.1	280	14444.4	280	19131.3	280	20137.5	280	18329.4	280	20376.5
285	8930.61	285	14255.1	285	14514.1	285	19176.2	285	20187.3	285	18409.1	285	20421.4
290	9000.35	290	14235.2	290	14568.9	290	19231	290	20242.1	290	18478.9	290	20476.2
295	9070.08	295	14175.4	295	14628.7	295	19275.8	295	20267	295	18543.6	295	20570.8
300	9129.85	300	14150.5	300	14668.5	300	19315.6	300	20311.8	300	18598.4	300	20655.5
305	9189.62	305	14160.5	305	14718.3	305	19355.5	305	20391.5	305	18653.2	305	20730.2
310	9234.44	310	14190.4	310	14753.2	310	19410.3	310	20426.4	310	18703	310	20780
315	9289.23	315	14205.3	315	14803	315	19455.1	315	20426.4	315	18757.8	315	20804.9
320	9334.06	320	14215.3	320	14842.9	320	19509.9	320	20426.4	320	18807.6	320	20824.8
325	9378.89	325	14255.1	325	14902.6	325	19569.7	325	20421.4	325	18842.5	325	20854.7
330	9413.75	330	14339.8	330	14952.4	330	19624.4	330	20441.3	330	18882.3	330	20869.6
335	9443.64	335	14439.4	335	14997.3	335	19674.2	335	20461.2	335	18937.1	335	20904.5
340	9478.5	340	14529.1	340	14977.3	340	19719.1	340	20491.1	340	18981.9	340	20929.4
345	9508.39	345	14603.8	345	14912.6	345	19768.9	345	20530.9	345	19031.7	345	20974.2
350	9543.26	350	14638.6	350	14837.9	350	19803.7	350	20595.7	350	19091.5	350	21004.1
355	9578.12	355	14678.5	355	14768.1	355	19838.6	355	20640.5	355	19166.2	355	21019.1
360	9603.03	360	14713.3	360	14753.2	360	19853.6	360	20715.2	360	19226	360	21044
365	9632.91	365	14758.2	365	14778.1	365	19883.4	365	20814.9	365	19275.8	365	21058.9
370	9662.8	370	14793	370	14813	370	19893.4	370	20899.5	370	19305.7	370	21049
375	9697.66	375	14832.9	375	14842.9	375	19908.3	375	20954.3	375	19325.6	375	21073.9
380	9727.55	380	14852.8	380	14882.7	380	19913.3	380	20979.2	380	19320.6	380	21078.8
385	9752.45	385	14872.7	385	14927.5	385	19923.3	385	20979.2	385	19330.6	385	21123.7
390	9782.34	390	14882.7	390	14992.3	390	19948.2	390	20989.2	390	19355.5	390	21138.6
395	9812.22	395	14917.6	395	15042.1	395	19963.1	395	20989.2	395	19390.3	395	21158.5
400	9847.09	400	14952.4	400	15106.8	400	19968.1	400	20984.2	400	19420.2	400	21178.5
405	9876.97	405	15007.2	405	15151.7	405	19988	405	20979.2	405	19430.2	405	21203.4
410	9911.84	410	15027.1	410	15186.5	410	20008	410	20994.2	410	19420.2	410	21258.1
415	9941.72	415	15057	415	15216.4	415	20017.9	415	21044	415	19415.2	415	21322.9
420	9966.63	420	15101.9	420	15251.3	420	20032.9	420	21098.8	420	19430.2	420	21382.7
425	10001.5	425	15181.5	425	15301.1	425	20057.8	425	21143.6	425	19440.1	425	21427.5
430	10016.4	430	15286.1	430	15365.8	430	20077.7	430	21193.4	430	19490	430	21432.5
435	10031.4	435	15400.7	435	15435.6	435	20107.6	435	21203.4	435	19549.7	435	21412.6
440	10046.3	440	15460.5	440	15520.2	440	20122.5	440	21223.3	440	19599.5	440	21372.7
445	10061.3	445	15485.4	445	15585	445	20142.4	445	21218.3	445	19644.4	445	21352.8
450	10081.2	450	15555.1	450	15654.7	450	20157.4	450	21223.3	450	19674.2	450	21337.8
455	10096.1	455	15604.9	455	15724.5	455	20167.3	455	21228.3	455	19699.2	455	21308
460	10121	460	15629.8	460	15799.2	460	20172.3	460	21238.2	460	19719.1	460	21263.1
465	10131	465	15654.7	465	15878.9	465	20167.3	465	21253.2	465	19744	465	21203.4
470	10155.9	470	15674.6	470	15948.6	470	20132.5	470	21283.1	470	19763.9	470	21113.7
475	10170.8	475	15674.6	475	15998.4	475	20097.6	475	21337.8	475	19778.8	475	21024.1
480	10195.7	480	15684.6	480	16053.2	480	20042.8	480	21402.6	480	19803.7	480	20984.2
485	10205.7	485	15709.5	485	16103	485	19988	485	21452.4	485	19833.6	485	21009.1
490	10235.6	490	15729.4	490	16147.8	490	19943.2	490	21497.2	490	19858.5	490	21073.9
495	10255.5	495	15739.4	495	16182.7	495	19883.4	495	21537.1	495	19868.5	495	21148.6
500	10285.4	500	15744.4	500	16202.6	500	19843.6	500	21576.9	500	19888.4	500	21243.2
505	10310.3	505	15729.4	505	16227.5	505	19778.8	505	21611.8	505	19913.3	505	21317.9
510	10345.2	510	15729.4	510	16252.4	510	19719.1	510	21636.7	510	19938.2	510	21367.7
515	10365.1	515	15719.5	515	16252.4	515	19649.3	515	21676.5	515	19968.1	515	21417.5
520	10385	520	15719.5	520	16242.5	520	19594.6	520	21706.4	520	19983.1	520	21467.3
525	10419.9	525	15719.5	525	16222.5	525	19549.7	525	21726.3	525	20012.9	525	21497.2
530	10424.9	530	15729.4	530	16207.6	530	19519.8	530	21736.3	530	20042.8	530	21532.1
535	10449.8	535	15754.3	535	16202.6	535	19499.9	535	21746.3	535	20072.7	535	21537.1
540	10469.7	540	15789.2	540	16197.6	540	19499.9	540	21756.2	540	20107.6	540	21507.2
545	10474.7	545	15834	545	16212.6	545	19519.8	545	21756.2	545	20137.5	545	21482.3
550	10494.6	550	15893.8	550	16227.5	550	19549.7	550	21751.3	550	20167.3	550	21467.3
555	10504.6	555	15973.5	555	16242.5	555	19574.6	555	21741.3	555	20192.3	555	21462.4
560	10519.5	560	16058.2	560	16262.4	560	19594.6	560	21736.3	560	20217.2	560	21482.3
565	10534.4	565	16113	565	16287.3	565	19609.5	565	21746.3	565	20242.1	565	21517.2
570	10549.4	570	16142.8	570	16307.2	570	19609.5	570	21756.2	570	20267	570	21562
575	10564.3	575	16152.8	575	16332.1	575	19599.5	575	21796.1	575	20291.9	575	21636.7
580	10584.2	580	16162.8	580	16362	580	19584.6	580	21826	580	20311.8	580	21726.3
585	10614.1	585	16177.7	585	16406.8	585	19544.7	585	21840.9	585	20331.7	585	21821
590	10634.1	590	16182.7	590	16441.7	590	19509.9	590	21840.9	590	20341.7	590	21900.7
595	10654	595	16212.6	595	16496.5	595	19460.1	595	21816	595	20371.6	595	21980.4
600	10673.9	600	16237.5	600	16556.3	600	19415.2	600	21771.2	600	20406.4	600	22040.1
605	10698.8	605	16272.3	605	16596.1	605	19390.3	605	21726.3	605	20446.3	605	22085
610	10718.7	610	16317.2	610	16626	610	19390.3	610	21706.4	610	20491.1	610	22104.9
615	10738.7	615	16347.1	615	16675.8	615	19405.3	615	21696.5	615	20501.1	615	22119.8
620	10768.5	620	16381.9	620	16710.7	620	19440.1	620	21686.5	620	20516	620	22119.8
625	10788.5	625	16396.9	625	16730.6	625	19480	625	21681.5	625	20540.9	625	22104.9
630	10803.4	630	16406.8	630	16750.5	630	19490	630	21646.7	630	20550.9	630	22085
635	10828.3	635	16426.8	635	16770.4	635	19475	635	21616.8	635	20575.8	635	22080
640	10843.3	640	16441.7	640	16765.4	640	19430.2	640	21601.8	640	20590.7	640	22109.9
645	10873.1	645	16461.6	645	16770.4	645	19385.4	645	21576.9	645	20610.6	645	22149.7
650	10883.1	650	16476.6	650	16775.4	650	19370.4	650	21562	650	20645.5	650	22169.6
655	10898	655	16471.6	655	16785.4	655	19385.4	655	21571.9	655	20680.4	655	22204.5
660	10908	660	16456.6	660	16795.3	660	19405.3	660	21586.9	660	20715.2	660	22249.3
665	10922.9	665	16441.7	665	16815.3	665	19420.2	665	21576.9	665	20735.2	665	22284.2
670	10942.9	670	16426.8	670	16815.3	670	19425.2	670	21581.9	670	20755.1	670	22324
675	10972.8	675	16401.8	675	16805.3	675	19400.3	675	21591.9	675	20770	675	22358.9
680	11002.6	680	16391.9	680	16785.4	680	19350.5	680	21611.8	680	20780	680	22403.7
685	11047.5	685	16396.9	685	16770.4	685	19310.6	685	21641.7	685	20790	685	22438.6
690	11077.3	690	16421.8	690	16750.5	690	19320.6	690	21671.6	690	20809.9	690	22473.5
695	11097.3	695	16436.7	695	16750.5	695	19425.2	695	21696.5	695	20824.8	695	22508.3
700	11112.2	700	16461.6	700	16745.5	700	19584.6	700	21711.4	700	20859.7	700	22563.1
705	11112.2	705	16481.5	705	16750.5	705	19724.1	705	21716.4	705	20884.6	705	22588
710	11102.3	710	16486.5	710	16730.6	710	19818.7	710	21721.4	710	20914.5	710	22622.9
715	11102.3	715	16496.5	715	16730.6	715	19858.5	715	21731.3	715	20939.4	715	22647.8
720	11112.2	720	16501.5	720	16715.6	720	19838.6	720	21731.3	720	20969.3	720	22647.8
725	11112.2	725	16516.4	725	16715.6	725	19803.7	725	21751.3	725	20989.2	725	22652.8
730	11122.2	730	16511.4	730	16725.6	730	19778.8	730	21761.2	730	21014.1	730	22662.7
735	11132.1	735	16521.4	735	16745.5	735	19808.7	735	21791.1	735	21029	735	22692.6
740	11142.1	740	16526.4	740	16770.4	740	19878.5	740	21821	740	21034	740	22727.5
745	11152.1	745	16546.3	745	16780.4	745	19908.3	745	21821	745	21044	745	22742.4
750	11167	750	16566.2	750	16800.3	750	19933.3	750	21826	750	21063.9	750	22772.3
755	11186.9	755	16586.1	755	16835.2	755	19983.1	755	21835.9	755	21088.8	755	22772.3
760	11191.9	760	16616	760	16865.1	760	20047.8	760	21835.9	760	21108.7	760	22777.3
765	11206.9	765	16631	765	16904.9	765	20112.6	765	21860.8	765	21123.7	765	22792.2
770	11221.8	770	16645.9	770	16944.8	770	20152.4	770	21880.8	770	21153.6	770	22802.2
775	11241.7	775	16660.9	775	16974.6	775	20177.3	775	21905.7	775	21158.5	775	22822.1
780	11261.6	780	16670.8	780	17014.5	780	20177.3	780	21925.6	780	21168.5	780	22837.1
785	11251.7	785	16685.8	785	17039.4	785	20162.4	785	21935.5	785	21168.5	785	22857
790	11256.7	790	16690.7	790	17064.3	790	20152.4	790	21940.5	790	21183.4	790	22876.9
795	11281.6	795	16695.7	795	17094.2	795	20157.4	795	21935.5	795	21188.4	795	22891.9
800	11291.5	800	16705.7	800	17114.1	800	20202.2	800	21910.6	800	21188.4	800	22911.8
805	11306.5	805	16705.7	805	17139	805	20237.1	805	21880.8	805	21203.4	805	22906.8
810	11321.4	810	16700.7	810	17158.9	810	20252	810	21830.9	810	21208.3	810	22876.9
815	11336.4	815	16695.7	815	17183.8	815	20281.9	815	21781.1	815	21228.3	815	22782.3
820	11351.3	820	16690.7	820	17203.8	820	20301.8	820	21711.4	820	21248.2	820	22647.8
825	11361.3	825	16695.7	825	17213.7	825	20291.9	825	21656.6	825	21258.1	825	22528.3
830	11376.2	830	16695.7	830	17218.7	830	20276.9	830	21646.7	830	21268.1	830	22513.3
835	11376.2	835	16710.7	835	17233.6	835	20257	835	21651.6	835	21273.1	835	22583
840	11391.1	840	16735.6	840	17233.6	840	20257	840	21691.5	840	21263.1	840	22627.9
845	11401.1	845	16760.5	845	17243.6	845	20286.9	845	21771.2	845	21258.1	845	22657.8
850	11411.1	850	16800.3	850	17243.6	850	20306.8	850	21850.9	850	21248.2	850	22672.7
855	11421	855	16840.2	855	17248.6	855	20321.8	855	21915.6	855	21238.2	855	22712.5
860	11436	860	16890	860	17268.5	860	20346.7	860	21990.3	860	21223.3	860	22712.5
865	11445.9	865	16929.8	865	17278.5	865	20371.6	865	22035.2	865	21213.3	865	22707.6
870	11455.9	870	16954.7	870	17308.4	870	20401.4	870	22075	870	21208.3	870	22682.7
875	11465.9	875	16984.6	875	17333.3	875	20416.4	875	22094.9	875	21208.3	875	22637.8
880	11470.8	880	17019.5	880	17373.1	880	20436.3	880	22114.9	880	21208.3	880	22608
885	11475.8	885	17059.3	885	17422.9	885	20451.3	885	22129.8	885	21193.4	885	22578.1
890	11490.8	890	17094.2	890	17462.8	890	20481.1	890	22164.7	890	21188.4	890	22558.1
895	11495.7	895	17134	895	17487.7	895	20501.1	895	22199.5	895	21198.4	895	22568.1
900	11505.7	900	17168.9	900	17507.6	900	20511	900	22224.4	900	21218.3	900	22603
905	11520.6	905	17188.8	905	17537.5	905	20540.9	905	22249.3	905	21238.2	905	22637.8
910	11535.6	910	17203.8	910	17567.4	910	20555.9	910	22284.2	910	21278.1	910	22687.6
915	11545.5	915	17208.7	915	17597.2	915	20570.8	915	22319.1	915	21312.9	915	22752.4
920	11560.5	920	17208.7	920	17612.2	920	20570.8	920	22358.9	920	21332.9	920	22812.2
925	11565.5	925	17218.7	925	17632.1	925	20585.7	925	22398.8	925	21347.8	925	22862
930	11575.4	930	17238.6	930	17657	930	20590.7	930	22468.5	930	21357.8	930	22901.8
935	11585.4	935	17263.5	935	17681.9	935	20610.6	935	22508.3	935	21372.7	935	22936.7
940	11600.3	940	17303.4	940	17706.8	940	20645.5	940	22538.2	940	21372.7	940	22946.6
945	11610.3	945	17338.2	945	17751.7	945	20690.3	945	22558.1	945	21397.6	945	22946.6
950	11620.3	950	17378.1	950	17781.5	950	20730.2	950	22563.1	950	21402.6	950	22946.6
955	11640.2	955	17417.9	955	17811.4	955	20785	955	22553.2	955	21412.6	955	22956.6
960	11655.1	960	17457.8	960	17836.3	960	20844.7	960	22523.3	960	21402.6	960	22961.6
965	11685	965	17497.6	965	17866.2	965	20904.5	965	22493.4	965	21407.6	965	22971.6
970	11709.9	970	17542.5	970	17881.2	970	20954.3	970	22483.4	970	21412.6	970	22991.5
975	11739.8	975	17587.3	975	17896.1	975	20994.2	975	22493.4	975	21417.5	975	23021.4
980	11774.7	980	17627.1	980	17901.1	980	21014.1	980	22513.3	980	21432.5	980	23051.2
985	11809.5	985	17667	985	17921	985	21034	985	22558.1	985	21452.4	985	23081.1
990	11834.4	990	17691.9	990	17926	990	21044	990	22593	990	21467.3	990	23116
995	11844.4	995	17701.8	995	17921	995	21049	995	22637.8	995	21482.3	995	23160.8
1000	11864.3	1000	17711.8	1000	17931	1000	21044	1000	22682.7	1000	21492.2	1000	23195.7
1005	11869.3	1005	17711.8	1005	17926	1005	21029	1005	22712.5	1005	21502.2	1005	23210.6
1010	11884.2	1010	17706.8	1010	17926	1010	21014.1	1010	22757.4	1010	21497.2	1010	23220.6
1015	11884.2	1015	17696.9	1015	17931	1015	21009.1	1015	22782.3	1015	21502.2	1015	23225.6
1020	11889.2	1020	17706.8	1020	17931	1020	21009.1	1020	22792.2	1020	21487.3	1020	23205.7
1025	11884.2	1025	17711.8	1025	17931	1025	21019.1	1025	22817.1	1025	21492.2	1025	23185.7
1030	11889.2	1030	17726.7	1030	17921	1030	21024.1	1030	22837.1	1030	21497.2	1030	23180.7
1035	11894.2	1035	17731.7	1035	17931	1035	21029	1035	22847	1035	21512.2	1035	23185.7
1040	11909.1	1040	17731.7	1040	17916	1040	21039	1040	22847	1040	21512.2	1040	23220.6
1045	11914.1	1045	17726.7	1045	17911	1045	21044	1045	22852	1045	21527.1	1045	23240.5
1050	11924.1	1050	17721.8	1050	17911	1050	21044	1050	22842.1	1050	21542.1	1050	23265.4
1055	11929.1	1055	17721.8	1055	17911	1055	21039	1055	22842.1	1055	21547	1055	23275.4
1060	11934.1	1060	17716.8	1060	17916	1060	21019.1	1060	22842.1	1060	21547	1060	23285.3
1065	11939	1065	17706.8	1065	17911	1065	21014.1	1065	22852	1065	21562	1065	23285.3
1070	11944	1070	17701.8	1070	17916	1070	21014.1	1070	22852	1070	21562	1070	23290.3
1075	11939	1075	17696.9	1075	17911	1075	21044	1075	22842.1	1075	21557	1075	23285.3
1080	11944	1080	17706.8	1080	17921	1080	21063.9	1080	22817.1	1080	21571.9	1080	23280.4
1085	11959	1085	17706.8	1085	17931	1085	21073.9	1085	22797.2	1085	21562	1085	23270.4
1090	11968.9	1090	17711.8	1090	17926	1090	21093.8	1090	22797.2	1090	21557	1090	23260.4
1095	11998.8	1095	17721.8	1095	17935.9	1095	21113.7	1095	22797.2	1095	21552	1095	23245.5
1100	12003.8	1100	17741.7	1100	17935.9	1100	21133.6	1100	22812.2	1100	21547	1100	23230.6
1105	12028.7	1105	17756.6	1105	17935.9	1105	21168.5	1105	22832.1	1105	21552	1105	23230.6
1110	12038.6	1110	17741.7	1110	17945.9	1110	21188.4	1110	22852	1110	21576.9	1110	23230.6
1115	12053.6	1115	17721.8	1115	17965.8	1115	21208.3	1115	22867	1115	21586.9	1115	23230.6
1120	12058.6	1120	17711.8	1120	17985.7	1120	21228.3	1120	22896.8	1120	21596.8	1120	23220.6
1125	12053.6	1125	17701.8	1125	18000.7	1125	21228.3	1125	22911.8	1125	21611.8	1125	23220.6
1130	12058.6	1130	17701.8	1130	18020.6	1130	21253.2	1130	22936.7	1130	21631.7	1130	23220.6
1135	12063.6	1135	17696.9	1135	18045.5	1135	21273.1	1135	22961.6	1135	21636.7	1135	23215.6
1140	12068.5	1140	17706.8	1140	18080.4	1140	21293	1140	22966.6	1140	21661.6	1140	23215.6
1145	12073.5	1145	17711.8	1145	18100.3	1145	21308	1145	22971.6	1145	21671.6	1145	23230.6
1150	12088.5	1150	17711.8	1150	18120.2	1150	21308	1150	22971.6	1150	21691.5	1150	23245.5
1155	12098.4	1155	17716.8	1155	18125.2	1155	21293	1155	22981.5	1155	21711.4	1155	23255.5
1160	12113.4	1160	17736.7	1160	18130.2	1160	21258.1	1160	22986.5	1160	21736.3	1160	23270.4
1165	12123.3	1165	17761.6	1165	18145.1	1165	21188.4	1165	22991.5	1165	21756.2	1165	23290.3
1170	12128.3	1170	17781.5	1170	18140.2	1170	21123.7	1170	23006.4	1170	21771.2	1170	23305.3
1175	12133.3	1175	17786.5	1175	18135.2	1175	21063.9	1175	23026.3	1175	21771.2	1175	23310.2
1180	12148.2	1180	17786.5	1180	18125.2	1180	21024.1	1180	23041.3	1180	21786.1	1180	23310.2
1185	12163.2	1185	17771.6	1185	18120.2	1185	21039	1185	23051.2	1185	21791.1	1185	23320.2
1190	12173.1	1190	17766.6	1190	18110.3	1190	21068.9	1190	23056.2	1190	21806	1190	23325.2
1195	12188.1	1195	17771.6	1195	18100.3	1195	21103.7	1195	23046.3	1195	21816	1195	23330.2
1200	12208	1200	17771.6	1200	18105.3	1200	21128.6	1200	23046.3	1200	21835.9	1200	23325.2
1205	12208	1205	17776.6	1205	18100.3	1205	21128.6	1205	23041.3	1205	21845.9	1205	23320.2
1210	12218	1210	17796.5	1210	18090.3	1210	21118.7	1210	23046.3	1210	21840.9	1210	23330.2
1215	12222.9	1215	17836.3	1215	18085.4	1215	21103.7	1215	23041.3	1215	21850.9	1215	23325.2
1220	12222.9	1220	17876.2	1220	18085.4	1220	21083.8	1220	23061.2	1220	21850.9	1220	23325.2
1225	12232.9	1225	17926	1225	18080.4	1225	21063.9	1225	23061.2	1225	21860.8	1225	23320.2
1230	12232.9	1230	17970.8	1230	18085.4	1230	21058.9	1230	23081.1	1230	21860.8	1230	23330.2
1235	12242.9	1235	18005.7	1235	18075.4	1235	21053.9	1235	23101.1	1235	21865.8	1235	23320.2
1240	12242.9	1240	18030.6	1240	18085.4	1240	21063.9	1240	23126	1240	21870.8	1240	23325.2
1245	12247.8	1245	18035.6	1245	18085.4	1245	21078.8	1245	23145.9	1245	21875.8	1245	23310.2
1250	12262.8	1250	18015.6	1250	18085.4	1250	21108.7	1250	23160.8	1250	21875.8	1250	23315.2
1255	12267.8	1255	17990.7	1255	18095.3	1255	21138.6	1255	23185.7	1255	21865.8	1255	23315.2
1260	12272.7	1260	17970.8	1260	18100.3	1260	21163.5	1260	23190.7	1260	21850.9	1260	23315.2
1265	12292.7	1265	17940.9	1265	18100.3	1265	21193.4	1265	23200.7	1265	21845.9	1265	23310.2
1270	12307.6	1270	17916	1270	18095.3	1270	21208.3	1270	23210.6	1270	21845.9	1270	23295.3
1275	12312.6	1275	17906.1	1275	18100.3	1275	21228.3	1275	23220.6	1275	21840.9	1275	23290.3
1280	12327.5	1280	17916	1280	18105.3	1280	21238.2	1280	23230.6	1280	21840.9	1280	23270.4
1285	12327.5	1285	17921	1285	18110.3	1285	21238.2	1285	23225.6	1285	21845.9	1285	23265.4
1290	12337.5	1290	17950.9	1290	18115.3	1290	21243.2	1290	23215.6	1290	21845.9	1290	23265.4
1295	12337.5	1295	17960.8	1295	18120.2	1295	21253.2	1295	23210.6	1295	21845.9	1295	23260.4
1300	12347.5	1300	17980.8	1300	18120.2	1300	21243.2	1300	23200.7	1300	21845.9	1300	23280.4
1305	12362.4	1305	17995.7	1305	18120.2	1305	21248.2	1305	23185.7	1305	21850.9	1305	23290.3
1310	12382.3	1310	18015.6	1310	18120.2	1310	21263.1	1310	23185.7	1310	21860.8	1310	23310.2
1315	12392.3	1315	18035.6	1315	18120.2	1315	21273.1	1315	23180.7	1315	21855.8	1315	23330.2
1320	12412.2	1320	18065.4	1320	18110.3	1320	21288	1320	23180.7	1320	21850.9	1320	23345.1
1325	12432.1	1325	18090.3	1325	18110.3	1325	21288	1325	23180.7	1325	21845.9	1325	23370
1330	12447.1	1330	18090.3	1330	18110.3	1330	21283.1	1330	23180.7	1330	21835.9	1330	23385
1335	12467	1335	18110.3	1335	18125.2	1335	21278.1	1335	23180.7	1335	21835.9	1335	23394.9
1340	12477	1340	18110.3	1340	18135.2	1340	21248.2	1340	23165.8	1340	21830.9	1340	23419.8
1345	12491.9	1345	18120.2	1345	18145.1	1345	21213.3	1345	23180.7	1345	21826	1345	23439.7
1350	12491.9	1350	18130.2	1350	18155.1	1350	21193.4	1350	23180.7	1350	21826	1350	23454.7
1355	12491.9	1355	18150.1	1355	18155.1	1355	21188.4	1355	23195.7	1355	21830.9	1355	23464.7
1360	12477	1360	18170	1360	18165.1	1360	21188.4	1360	23210.6	1360	21845.9	1360	23464.7
1365	12486.9	1365	18180	1365	18170	1365	21203.4	1365	23250.5	1365	21860.8	1365	23469.6
1370	12491.9	1370	18199.9	1370	18165.1	1370	21238.2	1370	23245.5	1370	21875.8	1370	23449.7
1375	12491.9	1375	18209.9	1375	18150.1	1375	21258.1	1375	23245.5	1375	21880.8	1375	23439.7
1380	12501.9	1380	18209.9	1380	18140.2	1380	21268.1	1380	23260.4	1380	21890.7	1380	23414.8
1385	12511.8	1385	18199.9	1385	18140.2	1385	21278.1	1385	23280.4	1385	21900.7	1385	23385
1390	12521.8	1390	18194.9	1390	18135.2	1390	21298	1390	23290.3	1390	21910.6	1390	23380
1395	12521.8	1395	18170	1395	18130.2	1395	21327.9	1395	23290.3	1395	21925.6	1395	23380
1400	12531.7	1400	18165.1	1400	18125.2	1400	21367.7	1400	23280.4	1400	21940.5	1400	23375
1405	12531.7	1405	18145.1	1405	18115.3	1405	21392.6	1405	23250.5	1405	21950.5	1405	23375
1410	12531.7	1410	18115.3	1410	18105.3	1410	21422.5	1410	23235.5	1410	21955.5	1410	23375
1415	12531.7	1415	18100.3	1415	18095.3	1415	21452.4	1415	23200.7	1415	21955.5	1415	23375
1420	12521.8	1420	18075.4	1420	18095.3	1420	21497.2	1420	23190.7	1420	21950.5	1420	23375
1425	12521.8	1425	18040.5	1425	18090.3	1425	21532.1	1425	23185.7	1425	21945.5	1425	23385
1430	12516.8	1430	18025.6	1430	18090.3	1430	21557	1430	23185.7	1430	21950.5	1430	23380
1435	12506.8	1435	17990.7	1435	18085.4	1435	21576.9	1435	23185.7	1435	21950.5	1435	23389.9
1440	12506.8	1440	17980.8	1440	18075.4	1440	21581.9	1440	23190.7	1440	21950.5	1440	23404.9
1445	12511.8	1445	17970.8	1445	18065.4	1445	21571.9	1445	23175.8	1445	21950.5	1445	23414.8
1450	12506.8	1450	17970.8	1450	18060.5	1450	21571.9	1450	23155.8	1450	21955.5	1450	23424.8
1455	12521.8	1455	17970.8	1455	18055.5	1455	21586.9	1455	23130.9	1455	21950.5	1455	23439.7
1460	12516.8	1460	17980.8	1460	18040.5	1460	21606.8	1460	23091.1	1460	21960.4	1460	23454.7
1465	12521.8	1465	17990.7	1465	18040.5	1465	21626.7	1465	23061.2	1465	21965.4	1465	23469.6
1470	12526.8	1470	17995.7	1470	18035.6	1470	21631.7	1470	23041.3	1470	21980.4	1470	23474.6
1475	12531.7	1475	17995.7	1475	18035.6	1475	21616.8	1475	23031.3	1475	21975.4	1475	23479.6
1480	12536.7	1480	18000.7	1480	18050.5	1480	21606.8	1480	23026.3	1480	21980.4	1480	23479.6
1485	12536.7	1485	17985.7	1485	18055.5	1485	21586.9	1485	23021.4	1485	21985.3	1485	23474.6
1490	12531.7	1490	17985.7	1490	18060.5	1490	21586.9	1490	23016.4	1490	22000.3	1490	23464.7
1495	12516.8	1495	17990.7	1495	18060.5	1495	21586.9	1495	23006.4	1495	21995.3	1495	23454.7
1500	12506.8	1500	18000.7	1500	18055.5	1500	21601.8	1500	22986.5	1500	22000.3	1500	23434.8
1505	12501.9	1505	18010.7	1505	18045.5	1505	21611.8	1505	22966.6	1505	21995.3	1505	23414.8
1510	12496.9	1510	18035.6	1510	18035.6	1510	21621.7	1510	22941.7	1510	21995.3	1510	23404.9
1515	12511.8	1515	18060.5	1515	18010.7	1515	21616.8	1515	22926.7	1515	21990.3	1515	23404.9
1520	12521.8	1520	18080.4	1520	18000.7	1520	21596.8	1520	22931.7	1520	21995.3	1520	23404.9
1525	12536.7	1525	18090.3	1525	18000.7	1525	21616.8	1525	22921.7	1525	22010.3	1525	23399.9
1530	12556.7	1530	18105.3	1530	17995.7	1530	21621.7	1530	22921.7	1530	22015.2	1530	23414.8
1535	12566.6	1535	18110.3	1535	17990.7	1535	21631.7	1535	22926.7	1535	22030.2	1535	23424.8
1540	12576.6	1540	18120.2	1540	17990.7	1540	21631.7	1540	22926.7	1540	22035.2	1540	23449.7
1545	12586.5	1545	18120.2	1545	17985.7	1545	21641.7	1545	22926.7	1545	22040.1	1545	23459.7
1550	12606.5	1550	18125.2	1550	17985.7	1550	21646.7	1550	22926.7	1550	22040.1	1550	23474.6
1555	12606.5	1555	18120.2	1555	17975.8	1555	21651.6	1555	22926.7	1555	22055.1	1555	23479.6
1560	12616.4	1560	18105.3	1560	17970.8	1560	21661.6	1560	22911.8	1560	22045.1	1560	23474.6
1565	12621.4	1565	18095.3	1565	17970.8	1565	21676.5	1565	22921.7	1565	22050.1	1565	23464.7
1570	12631.4	1570	18075.4	1570	17960.8	1570	21701.4	1570	22921.7	1570	22060.1	1570	23449.7
1575	12636.3	1575	18075.4	1575	17955.9	1575	21746.3	1575	22906.8	1575	22060.1	1575	23434.8
1580	12651.3	1580	18065.4	1580	17940.9	1580	21791.1	1580	22896.8	1580	22075	1580	23419.8
1585	12651.3	1585	18050.5	1585	17926	1585	21816	1585	22896.8	1585	22085	1585	23399.9
1590	12651.3	1590	18055.5	1590	17906.1	1590	21826	1590	22891.9	1590	22089.9	1590	23380
1595	12646.3	1595	18050.5	1595	17891.1	1595	21826	1595	22891.9	1595	22094.9	1595	23370
1600	12641.3	1600	18060.5	1600	17871.2	1600	21826	1600	22896.8	1600	22094.9	1600	23360.1
1605	12636.3	1605	18070.4	1605	17861.2	1605	21821	1605	22896.8	1605	22104.9	1605	23355.1
1610	12636.3	1610	18080.4	1610	17856.2	1610	21835.9	1610	22916.8	1610	22099.9	1610	23345.1
1615	12626.4	1615	18085.4	1615	17831.3	1615	21840.9	1615	22926.7	1615	22094.9	1615	23360.1
1620	12621.4	1620	18095.3	1620	17816.4	1620	21845.9	1620	22931.7	1620	22094.9	1620	23350.1
1625	12621.4	1625	18100.3	1625	17801.5	1625	21835.9	1625	22921.7	1625	22080	1625	23360.1
1630	12616.4	1630	18100.3	1630	17796.5	1630	21816	1630	22911.8	1630	22075	1630	23355.1
1635	12611.4	1635	18095.3	1635	17781.5	1635	21796.1	1635	22906.8	1635	22060.1	1635	23350.1
1640	12601.5	1640	18100.3	1640	17771.6	1640	21756.2	1640	22881.9	1640	22050.1	1640	23355.1
1645	12586.5	1645	18100.3	1645	17761.6	1645	21736.3	1645	22857	1645	22050.1	1645	23350.1
1650	12591.5	1650	18095.3	1650	17761.6	1650	21756.2	1650	22837.1	1650	22050.1	1650	23355.1
1655	12591.5	1655	18110.3	1655	17756.6	1655	21776.2	1655	22832.1	1655	22045.1	1655	23345.1
1660	12596.5	1660	18120.2	1660	17751.7	1660	21786.1	1660	22832.1	1660	22045.1	1660	23335.2
1665	12591.5	1665	18125.2	1665	17756.6	1665	21796.1	1665	22832.1	1665	22025.2	1665	23330.2
1670	12596.5	1670	18140.2	1670	17751.7	1670	21796.1	1670	22832.1	1670	22020.2	1670	23325.2
1675	12596.5	1675	18150.1	1675	17761.6	1675	21791.1	1675	22827.1	1675	22010.3	1675	23330.2
1680	12596.5	1680	18170	1680	17756.6	1680	21801.1	1680	22817.1	1680	22025.2	1680	23335.2
1685	12596.5	1685	18190	1685	17751.7	1685	21806	1685	22807.2	1685	22035.2	1685	23335.2
1690	12596.5	1690	18209.9	1690	17756.6	1690	21801.1	1690	22792.2	1690	22030.2	1690	23335.2
1695	12596.5	1695	18229.8	1695	17761.6	1695	21806	1695	22777.3	1695	22050.1	1695	23335.2
1700	12601.5	1700	18244.8	1700	17741.7	1700	21801.1	1700	22757.4	1700	22045.1	1700	23335.2
1705	12601.5	1705	18259.7	1705	17721.8	1705	21811	1705	22747.4	1705	22050.1	1705	23340.1
1710	12606.5	1710	18284.6	1710	17716.8	1710	21811	1710	22742.4	1710	22060.1	1710	23350.1
1715	12606.5	1715	18304.5	1715	17706.8	1715	21826	1715	22742.4	1715	22070	1715	23350.1
1720	12606.5	1720	18324.4	1720	17701.8	1720	21821	1720	22737.5	1720	22075	1720	23335.2
1725	12601.5	1725	18339.4	1725	17691.9	1725	21821	1725	22747.4	1725	22075	1725	23325.2
1730	12596.5	1730	18354.3	1730	17681.9	1730	21826	1730	22747.4	1730	22075	1730	23315.2
1735	12606.5	1735	18369.3	1735	17672	1735	21840.9	1735	22757.4	1735	22085	1735	23295.3
1740	12591.5	1740	18384.2	1740	17662	1740	21850.9	1740	22757.4	1740	22075	1740	23280.4
1745	12581.6	1745	18389.2	1745	17647.1	1745	21860.8	1745	22762.4	1745	22075	1745	23270.4
1750	12571.6	1750	18384.2	1750	17622.1	1750	21885.7	1750	22757.4	1750	22070	1750	23250.5
1755	12561.6	1755	18384.2	1755	17612.2	1755	21895.7	1755	22762.4	1755	22065	1755	23230.6
1760	12561.6	1760	18374.3	1760	17587.3	1760	21900.7	1760	22742.4	1760	22060.1	1760	23205.7
1765	12576.6	1765	18354.3	1765	17582.3	1765	21905.7	1765	22722.5	1765	22065	1765	23190.7
1770	12581.6	1770	18329.4	1770	17577.3	1770	21915.6	1770	22702.6	1770	22060.1	1770	23180.7
1775	12591.5	1775	18314.5	1775	17557.4	1775	21915.6	1775	22687.6	1775	22055.1	1775	23165.8
1780	12596.5	1780	18284.6	1780	17547.4	1780	21930.6	1780	22682.7	1780	22055.1	1780	23165.8
1785	12611.4	1785	18259.7	1785	17537.5	1785	21925.6	1785	22672.7	1785	22050.1	1785	23160.8
1790	12611.4	1790	18224.8	1790	17527.5	1790	21910.6	1790	22667.7	1790	22060.1	1790	23160.8
1795	12621.4	1795	18199.9	1795	17517.6	1795	21905.7	1795	22662.7	1795	22050.1	1795	23145.9
1800	12626.4	1800	18175	1800	17512.6	1800	21880.8	1800	22667.7	1800	22045.1	1800	23150.9
1805	12631.4	1805	18140.2	1805	17497.6	1805	21865.8	1805	22657.8	1805	22050.1	1805	23155.8
1810	12641.3	1810	18105.3	1810	17487.7	1810	21855.8	1810	22662.7	1810	22055.1	1810	23160.8
1815	12646.3	1815	18080.4	1815	17477.7	1815	21860.8	1815	22667.7	1815	22060.1	1815	23155.8
1820	12641.3	1820	18045.5	1820	17472.7	1820	21870.8	1820	22672.7	1820	22070	1820	23150.9
1825	12641.3	1825	18010.7	1825	17462.8	1825	21890.7	1825	22682.7	1825	22060.1	1825	23145.9
1830	12651.3	1830	17975.8	1830	17457.8	1830	21890.7	1830	22692.6	1830	22060.1	1830	23155.8
1835	12646.3	1835	17940.9	1835	17442.8	1835	21900.7	1835	22702.6	1835	22055.1	1835	23160.8
1840	12646.3	1840	17906.1	1840	17432.9	1840	21900.7	1840	22702.6	1840	22040.1	1840	23170.8
1845	12646.3	1845	17891.1	1845	17427.9	1845	21895.7	1845	22687.6	1845	22035.2	1845	23180.7
1850	12646.3	1850	17876.2	1850	17413	1850	21890.7	1850	22672.7	1850	22035.2	1850	23185.7
1855	12646.3	1855	17871.2	1855	17408	1855	21885.7	1855	22687.6	1855	22030.2	1855	23185.7
1860	12641.3	1860	17866.2	1860	17393	1860	21875.8	1860	22672.7	1860	22025.2	1860	23175.8
1865	12646.3	1865	17871.2	1865	17378.1	1865	21860.8	1865	22677.7	1865	22030.2	1865	23180.7
1870	12651.3	1870	17891.1	1870	17363.1	1870	21855.8	1870	22667.7	1870	22020.2	1870	23180.7
1875	12651.3	1875	17891.1	1875	17348.2	1875	21845.9	1875	22652.8	1875	22030.2	1875	23180.7
1880	12661.3	1880	17901.1	1880	17333.3	1880	21840.9	1880	22632.9	1880	22035.2	1880	23165.8
1885	12671.2	1885	17906.1	1885	17313.3	1885	21840.9	1885	22622.9	1885	22025.2	1885	23165.8
1890	12686.2	1890	17921	1890	17298.4	1890	21835.9	1890	22598	1890	22040.1	1890	23160.8
1895	12701.1	1895	17940.9	1895	17283.5	1895	21835.9	1895	22588	1895	22035.2	1895	23155.8
1900	12711.1	1900	17950.9	1900	17268.5	1900	21840.9	1900	22573.1	1900	22045.1	1900	23150.9
1905	12716	1905	17965.8	1905	17253.6	1905	21840.9	1905	22553.2	1905	22045.1	1905	23135.9
1910	12721	1910	17985.7	1910	17228.7	1910	21855.8	1910	22548.2	1910	22055.1	1910	23150.9
1915	12726	1915	17985.7	1915	17218.7	1915	21855.8	1915	22543.2	1915	22060.1	1915	23160.8
1920	12731	1920	18000.7	1920	17198.8	1920	21865.8	1920	22533.2	1920	22045.1	1920	23160.8
1925	12731	1925	18005.7	1925	17193.8	1925	21885.7	1925	22533.2	1925	22055.1	1925	23170.8
1930	12745.9	1930	17985.7	1930	17163.9	1930	21900.7	1930	22533.2	1930	22065	1930	23180.7
1935	12750.9	1935	17990.7	1935	17149	1935	21910.6	1935	22548.2	1935	22065	1935	23180.7
1940	12755.9	1940	17980.8	1940	17144	1940	21915.6	1940	22548.2	1940	22085	1940	23180.7
1945	12755.9	1945	17965.8	1945	17124.1	1945	21910.6	1945	22553.2	1945	22094.9	1945	23185.7
1950	12765.8	1950	17950.9	1950	17109.1	1950	21910.6	1950	22568.1	1950	22094.9	1950	23200.7
1955	12770.8	1955	17940.9	1955	17089.2	1955	21910.6	1955	22588	1955	22094.9	1955	23215.6
1960	12765.8	1960	17935.9	1960	17074.3	1960	21900.7	1960	22608	1960	22094.9	1960	23230.6
1965	12770.8	1965	17931	1965	17054.3	1965	21905.7	1965	22617.9	1965	22089.9	1965	23245.5
1970	12770.8	1970	17921	1970	17034.4	1970	21905.7	1970	22632.9	1970	22085	1970	23255.5
1975	12780.8	1975	17921	1975	17014.5	1975	21890.7	1975	22642.8	1975	22080	1975	23235.5
1980	12780.8	1980	17916	1980	17004.5	1980	21880.8	1980	22652.8	1980	22075	1980	23215.6
1985	12790.8	1985	17911	1985	16984.6	1985	21865.8	1985	22662.7	1985	22060.1	1985	23195.7
1990	12800.7	1990	17911	1990	16969.7	1990	21870.8	1990	22672.7	1990	22055.1	1990	23155.8
1995	12810.7	1995	17911	1995	16954.7	1995	21865.8	1995	22662.7	1995	22045.1	1995	23116
2000	12825.6	2000	17916	2000	16944.8	2000	21855.8	2000	22652.8	2000	22050.1	2000	23096.1
2005	12820.6	2005	17916	2005	16919.9	2005	21850.9	2005	22627.9	2005	22045.1	2005	23066.2
2010	12820.6	2010	17921	2010	16914.9	2010	21850.9	2010	22617.9	2010	22035.2	2010	23041.3
2015	12830.6	2015	17921	2015	16904.9	2015	21850.9	2015	22598	2015	22035.2	2015	23016.4
2020	12830.6	2020	17921	2020	16890	2020	21860.8	2020	22583	2020	22020.2	2020	23001.4
2025	12845.5	2025	17921	2025	16875	2025	21870.8	2025	22558.1	2025	22025.2	2025	22996.5
2030	12850.5	2030	17921	2030	16860.1	2030	21880.8	2030	22548.2	2030	22015.2	2030	22981.5
2035	12860.5	2035	17926	2035	16845.1	2035	21905.7	2035	22538.2	2035	22020.2	2035	22961.6
2040	12855.5	2040	17931	2040	16835.2	2040	21920.6	2040	22538.2	2040	22015.2	2040	22951.6
2045	12855.5	2045	17931	2045	16825.2	2045	21940.5	2045	22533.2	2045	22020.2	2045	22946.6
2050	12850.5	2050	17935.9	2050	16810.3	2050	21970.4	2050	22528.3	2050	22020.2	2050	22941.7
2055	12845.5	2055	17935.9	2055	16795.3	2055	21975.4	2055	22538.2	2055	22020.2	2055	22946.6
2060	12845.5	2060	17945.9	2060	16775.4	2060	21970.4	2060	22548.2	2060	22015.2	2060	22946.6
2065	12840.6	2065	17926	2065	16750.5	2065	21965.4	2065	22563.1	2065	22010.3	2065	22956.6
2070	12835.6	2070	17926	2070	16740.5	2070	21960.4	2070	22578.1	2070	22020.2	2070	22961.6
2075	12840.6	2075	17916	2075	16720.6	2075	21960.4	2075	22583	2075	22020.2	2075	22966.6
2080	12830.6	2080	17911	2080	16700.7	2080	21980.4	2080	22588	2080	22020.2	2080	22981.5
2085	12825.6	2085	17916	2085	16680.8	2085	22005.3	2085	22588	2085	22025.2	2085	22976.5
2090	12825.6	2090	17916	2090	16675.8	2090	22015.2	2090	22573.1	2090	22015.2	2090	22981.5
2095	12825.6	2095	17916	2095	16660.9	2095	22025.2	2095	22553.2	2095	22015.2	2095	22971.6
2100	12845.5	2100	17911	2100	16635.9	2100	22015.2	2100	22528.3	2100	22025.2	2100	22966.6
2105	12860.5	2105	17906.1	2105	16616	2105	22000.3	2105	22503.4	2105	22035.2	2105	22956.6
2110	12880.4	2110	17896.1	2110	16601.1	2110	21990.3	2110	22488.4	2110	22040.1	2110	22946.6
2115	12885.4	2115	17886.1	2115	16586.1	2115	21975.4	2115	22473.5	2115	22055.1	2115	22921.7
2120	12890.4	2120	17866.2	2120	16581.2	2120	21965.4	2120	22463.5	2120	22055.1	2120	22876.9
2125	12895.3	2125	17856.2	2125	16561.2	2125	21955.5	2125	22453.5	2125	22055.1	2125	22842.1
2130	12900.3	2130	17836.3	2130	16546.3	2130	21960.4	2130	22463.5	2130	22045.1	2130	22817.1
2135	12900.3	2135	17826.4	2135	16536.3	2135	21960.4	2135	22473.5	2135	22045.1	2135	22802.2
2140	12905.3	2140	17796.5	2140	16526.4	2140	21955.5	2140	22463.5	2140	22025.2	2140	22802.2
2145	12910.3	2145	17776.6	2145	16506.4	2145	21935.5	2145	22468.5	2145	22020.2	2145	22797.2
2150	12925.2	2150	17756.6	2150	16486.5	2150	21925.6	2150	22463.5	2150	22015.2	2150	22782.3
2155	12925.2	2155	17736.7	2155	16471.6	2155	21900.7	2155	22463.5	2155	22010.3	2155	22762.4
2160	12930.2	2160	17696.9	2160	16461.6	2160	21890.7	2160	22458.5	2160	21995.3	2160	22757.4
2165	12930.2	2165	17672	2165	16451.7	2165	21880.8	2165	22453.5	2165	21985.3	2165	22752.4
2170	12930.2	2170	17632.1	2170	16436.7	2170	21885.7	2170	22448.6	2170	21980.4	2170	22747.4
2175	12925.2	2175	17597.2	2175	16426.8	2175	21920.6	2175	22443.6	2175	21975.4	2175	22742.4
2180	12935.2	2180	17562.4	2180	16411.8	2180	21940.5	2180	22433.6	2180	21975.4	2180	22752.4
2185	12915.3	2185	17527.5	2185	16396.9	2185	21960.4	2185	22408.7	2185	21960.4	2185	22762.4
2190	12915.3	2190	17502.6	2190	16381.9	2190	21975.4	2190	22388.8	2190	21950.5	2190	22767.3
2195	12905.3	2195	17477.7	2195	16367	2195	21970.4	2195	22348.9	2195	21945.5	2195	22782.3
2200	12885.4	2200	17467.7	2200	16337.1	2200	21970.4	2200	22319.1	2200	21940.5	2200	22807.2
2205	12875.4	2205	17457.8	2205	16322.2	2205	21950.5	2205	22294.2	2205	21915.6	2205	22817.1
2210	12875.4	2210	17452.8	2210	16292.3	2210	21940.5	2210	22279.2	2210	21900.7	2210	22827.1
2215	12885.4	2215	17452.8	2215	16277.3	2215	21930.6	2215	22279.2	2215	21890.7	2215	22827.1
2220	12885.4	2220	17447.8	2220	16262.4	2220	21920.6	2220	22279.2	2220	21885.7	2220	22837.1
2225	12880.4	2225	17442.8	2225	16272.3	2225	21925.6	2225	22284.2	2225	21885.7	2225	22837.1
2230	12880.4	2230	17432.9	2230	16262.4	2230	21935.5	2230	22269.3	2230	21890.7	2230	22832.1
2235	12890.4	2235	17427.9	2235	16257.4	2235	21940.5	2235	22269.3	2235	21890.7	2235	22822.1
2240	12890.4	2240	17422.9	2240	16252.4	2240	21960.4	2240	22264.3	2240	21890.7	2240	22812.2
2245	12890.4	2245	17432.9	2245	16227.5	2245	21965.4	2245	22259.3	2245	21890.7	2245	22802.2
2250	12890.4	2250	17427.9	2250	16227.5	2250	21955.5	2250	22264.3	2250	21895.7	2250	22782.3
2255	12895.3	2255	17417.9	2255	16197.6	2255	21965.4	2255	22269.3	2255	21890.7	2255	22772.3
2260	12890.4	2260	17403	2260	16177.7	2260	21945.5	2260	22274.2	2260	21880.8	2260	22757.4
2265	12890.4	2265	17398	2265	16162.8	2265	21940.5	2265	22279.2	2265	21875.8	2265	22732.5
2270	12895.3	2270	17393	2270	16142.8	2270	21925.6	2270	22279.2	2270	21870.8	2270	22727.5
2275	12885.4	2275	17383.1	2275	16127.9	2275	21920.6	2275	22289.2	2275	21865.8	2275	22717.5
2280	12875.4	2280	17373.1	2280	16103	2280	21920.6	2280	22284.2	2280	21860.8	2280	22687.6
2285	12880.4	2285	17363.1	2285	16083.1	2285	21930.6	2285	22284.2	2285	21850.9	2285	22682.7
2290	12865.5	2290	17353.2	2290	16073.1	2290	21930.6	2290	22284.2	2290	21840.9	2290	22667.7
2295	12855.5	2295	17333.3	2295	16053.2	2295	21945.5	2295	22284.2	2295	21826	2295	22657.8
2300	12855.5	2300	17323.3	2300	16033.3	2300	21970.4	2300	22294.2	2300	21826	2300	22647.8
2305	12850.5	2305	17313.3	2305	16023.3	2305	21985.3	2305	22299.1	2305	21821	2305	22637.8
2310	12840.6	2310	17303.4	2310	16013.3	2310	21995.3	2310	22309.1	2310	21821	2310	22622.9
2315	12840.6	2315	17283.5	2315	15998.4	2315	22015.2	2315	22314.1	2315	21811	2315	22612.9
2320	12840.6	2320	17273.5	2320	15998.4	2320	22020.2	2320	22314.1	2320	21816	2320	22608
2325	12850.5	2325	17263.5	2325	15993.4	2325	22030.2	2325	22299.1	2325	21806	2325	22593
2330	12865.5	2330	17243.6	2330	15983.5	2330	22040.1	2330	22274.2	2330	21796.1	2330	22593
2335	12860.5	2335	17233.6	2335	15983.5	2335	22065	2335	22249.3	2335	21801.1	2335	22608
2340	12850.5	2340	17228.7	2340	15973.5	2340	22080	2340	22224.4	2340	21796.1	2340	22622.9
2345	12845.5	2345	17223.7	2345	15963.5	2345	22089.9	2345	22199.5	2345	21786.1	2345	22637.8
2350	12845.5	2350	17193.8	2350	15963.5	2350	22094.9	2350	22184.6	2350	21776.2	2350	22642.8
2355	12835.6	2355	17183.8	2355	15968.5	2355	22094.9	2355	22169.6	2355	21761.2	2355	22647.8
2360	12835.6	2360	17173.9	2360	15933.7	2360	22094.9	2360	22144.7	2360	21756.2	2360	22657.8
2365	12830.6	2365	17163.9	2365	15908.7	2365	22089.9	2365	22129.8	2365	21746.3	2365	22662.7
2370	12825.6	2370	17154	2370	15893.8	2370	22089.9	2370	22109.9	2370	21736.3	2370	22652.8
2375	12830.6	2375	17139	2375	15883.8	2375	22080	2375	22085	2375	21731.3	2375	22647.8
2380	12830.6	2380	17134	2380	15883.8	2380	22080	2380	22070	2380	21711.4	2380	22637.8
2385	12840.6	2385	17129	2385	15858.9	2385	22075	2385	22035.2	2385	21701.4	2385	22632.9
2390	12840.6	2390	17124.1	2390	15849	2390	22065	2390	22030.2	2390	21696.5	2390	22608
2395	12835.6	2395	17124.1	2395	15839	2395	22060.1	2395	22020.2	2395	21681.5	2395	22608
2400	12845.5	2400	17114.1	2400	15829.1	2400	22040.1	2400	22015.2	2400	21681.5	2400	22598
2405	12855.5	2405	17114.1	2405	15819.1	2405	22025.2	2405	22010.3	2405	21676.5	2405	22583
2410	12850.5	2410	17104.1	2410	15814.1	2410	22005.3	2410	22025.2	2410	21671.6	2410	22573.1
2415	12845.5	2415	17104.1	2415	15809.1	2415	22000.3	2415	22020.2	2415	21666.6	2415	22563.1
2420	12835.6	2420	17119.1	2420	15809.1	2420	21980.4	2420	22035.2	2420	21661.6	2420	22568.1
2425	12825.6	2425	17114.1	2425	15799.2	2425	21960.4	2425	22040.1	2425	21661.6	2425	22553.2
2430	12830.6	2430	17114.1	2430	15799.2	2430	21960.4	2430	22060.1	2430	21656.6	2430	22558.1
2435	12825.6	2435	17114.1	2435	15799.2	2435	21940.5	2435	22060.1	2435	21651.6	2435	22553.2
2440	12820.6	2440	17109.1	2440	15789.2	2440	21930.6	2440	22070	2440	21646.7	2440	22548.2
2445	12810.7	2445	17099.2	2445	15774.3	2445	21910.6	2445	22080	2445	21636.7	2445	22538.2
2450	12805.7	2450	17084.2	2450	15754.3	2450	21905.7	2450	22070	2450	21646.7	2450	22523.3
2455	12795.7	2455	17064.3	2455	15744.4	2455	21890.7	2455	22065	2455	21641.7	2455	22518.3
2460	12805.7	2460	17044.4	2460	15724.5	2460	21885.7	2460	22055.1	2460	21641.7	2460	22503.4
2465	12805.7	2465	17014.5	2465	15719.5	2465	21865.8	2465	22055.1	2465	21631.7	2465	22493.4
2470	12815.7	2470	16989.6	2470	15709.5	2470	21870.8	2470	22050.1	2470	21626.7	2470	22468.5
2475	12810.7	2475	16969.7	2475	15694.6	2475	21855.8	2475	22040.1	2475	21631.7	2475	22458.5
2480	12800.7	2480	16939.8	2480	15679.6	2480	21845.9	2480	22040.1	2480	21626.7	2480	22433.6
2485	12795.7	2485	16909.9	2485	15679.6	2485	21830.9	2485	22040.1	2485	21626.7	2485	22418.7
2490	12795.7	2490	16875	2490	15664.7	2490	21830.9	2490	22030.2	2490	21616.8	2490	22403.7
2495	12785.8	2495	16850.1	2495	15634.8	2495	21811	2495	22010.3	2495	21611.8	2495	22403.7
2500	12780.8	2500	16815.3	2500	15634.8	2500	21786.1	2500	21980.4	2500	21591.9	2500	22403.7
2505	12780.8	2505	16785.4	2505	15624.8	2505	21776.2	2505	21975.4	2505	21581.9	2505	22413.7
2510	12780.8	2510	16760.5	2510	15619.9	2510	21761.2	2510	21965.4	2510	21576.9	2510	22408.7
2515	12775.8	2515	16720.6	2515	15609.9	2515	21751.3	2515	21960.4	2515	21576.9	2515	22403.7
2520	12770.8	2520	16690.7	2520	15604.9	2520	21741.3	2520	21965.4	2520	21567	2520	22398.8
2525	12765.8	2525	16655.9	2525	15599.9	2525	21731.3	2525	21965.4	2525	21562	2525	22398.8
2530	12760.9	2530	16640.9	2530	15590	2530	21716.4	2530	21955.5	2530	21571.9	2530	22393.8
2535	12745.9	2535	16621	2535	15580	2535	21701.4	2535	21960.4	2535	21571.9	2535	22378.8
2540	12740.9	2540	16606.1	2540	15565.1	2540	21696.5	2540	21965.4	2540	21562	2540	22378.8
2545	12726	2545	16591.1	2545	15545.1	2545	21686.5	2545	21965.4	2545	21571.9	2545	22368.9
2550	12716	2550	16586.1	2550	15540.2	2550	21696.5	2550	21975.4	2550	21562	2550	22358.9
2555	12716	2555	16571.2	2555	15525.2	2555	21701.4	2555	21965.4	2555	21562	2555	22348.9
2560	12706.1	2560	16556.3	2560	15520.2	2560	21696.5	2560	21965.4	2560	21552	2560	22353.9
2565	12706.1	2565	16541.3	2565	15515.3	2565	21696.5	2565	21975.4	2565	21552	2565	22344
2570	12706.1	2570	16526.4	2570	15485.4	2570	21696.5	2570	21970.4	2570	21547	2570	22339
2575	12701.1	2575	16501.5	2575	15475.4	2575	21696.5	2575	21985.3	2575	21542.1	2575	22324
2580	12696.1	2580	16491.5	2580	15470.4	2580	21686.5	2580	21995.3	2580	21537.1	2580	22309.1
2585	12696.1	2585	16476.6	2585	15450.5	2585	21681.5	2585	22005.3	2585	21532.1	2585	22289.2
2590	12696.1	2590	16451.7	2590	15445.5	2590	21676.5	2590	21995.3	2590	21517.2	2590	22274.2
2595	12696.1	2595	16426.8	2595	15435.6	2595	21671.6	2595	21985.3	2595	21502.2	2595	22274.2
2600	12691.1	2600	16406.8	2600	15425.6	2600	21671.6	2600	21965.4	2600	21502.2	2600	22269.3
2605	12691.1	2605	16396.9	2605	15405.7	2605	21671.6	2605	21950.5	2605	21482.3	2605	22274.2
2610	12696.1	2610	16376.9	2610	15400.7	2610	21676.5	2610	21940.5	2610	21472.3	2610	22259.3
2615	12696.1	2615	16362	2615	15390.7	2615	21681.5	2615	21920.6	2615	21462.4	2615	22259.3
2620	12696.1	2620	16352	2620	15380.8	2620	21676.5	2620	21910.6	2620	21457.4	2620	22259.3
2625	12691.1	2625	16347.1	2625	15385.8	2625	21681.5	2625	21895.7	2625	21452.4	2625	22259.3
2630	12686.2	2630	16342.1	2630	15380.8	2630	21686.5	2630	21895.7	2630	21442.4	2630	22194.5
2635	12681.2	2635	16332.1	2635	15355.9	2635	21671.6	2635	21880.8	2635	21432.5	2635	22184.6
2640	12671.2	2640	16327.1	2640	15340.9	2640	21676.5	2640	21880.8	2640	21417.5	2640	22169.6
2645	12666.2	2645	16307.2	2645	15321	2645	21676.5	2645	21875.8	2645	21402.6	2645	22164.7
2650	12671.2	2650	16302.2	2650	15321	2650	21681.5	2650	21870.8	2650	21412.6	2650	22149.7
2655	12656.3	2655	16287.3	2655	15331	2655	21686.5	2655	21865.8	2655	21402.6	2655	22129.8
2660	12651.3	2660	16277.3	2660	15306.1	2660	21676.5	2660	21855.8	2660	21392.6	2660	22109.9
2665	12641.3	2665	16262.4	2665	15286.1	2665	21671.6	2665	21865.8	2665	21387.7	2665	22094.9
2670	12646.3	2670	16247.4	2670	15266.2	2670	21676.5	2670	21845.9	2670	21382.7	2670	22080
2675	12646.3	2675	16232.5	2675	15261.2	2675	21671.6	2675	21840.9	2675	21387.7	2675	22065
2680	12636.3	2680	16217.6	2680	15261.2	2680	21661.6	2680	21835.9	2680	21387.7	2680	22065
2685	12636.3	2685	16207.6	2685	15266.2	2685	21661.6	2685	21835.9	2685	21367.7	2685	22045.1
2690	12621.4	2690	16192.7	2690	15261.2	2690	21651.6	2690	21840.9	2690	21357.8	2690	22035.2
2695	12611.4	2695	16187.7	2695	15256.3	2695	21641.7	2695	21845.9	2695	21362.7	2695	22035.2
2700	12606.5	2700	16172.7	2700	15246.3	2700	21641.7	2700	21850.9	2700	21342.8	2700	22045.1
2705	12601.5	2705	16167.7	2705	15246.3	2705	21631.7	2705	21850.9	2705	21327.9	2705	22040.1
2710	12601.5	2710	16172.7	2710	15241.3	2710	21631.7	2710	21850.9	2710	21327.9	2710	22050.1
2715	12616.4	2715	16167.7	2715	15236.3	2715	21631.7	2715	21855.8	2715	21322.9	2715	22065
2720	12596.5	2720	16157.8	2720	15221.4	2720	21641.7	2720	21860.8	2720	21322.9	2720	22060.1
2725	12591.5	2725	16147.8	2725	15216.4	2725	21636.7	2725	21870.8	2725	21317.9	2725	22070
2730	12586.5	2730	16137.9	2730	15221.4	2730	21641.7	2730	21870.8	2730	21317.9	2730	22070
2735	12581.6	2735	16127.9	2735	15221.4	2735	21621.7	2735	21870.8	2735	21312.9	2735	22055.1
2740	12581.6	2740	16122.9	2740	15221.4	2740	21606.8	2740	21855.8	2740	21308	2740	22050.1
2745	12576.6	2745	16117.9	2745	15211.4	2745	21591.9	2745	21845.9	2745	21312.9	2745	22045.1
2750	12576.6	2750	16113	2750	15216.4	2750	21581.9	2750	21826	2750	21308	2750	22030.2
2755	12571.6	2755	16103	2755	15206.5	2755	21567	2755	21801.1	2755	21308	2755	22010.3
2760	12561.6	2760	16098	2760	15216.4	2760	21562	2760	21786.1	2760	21312.9	2760	22000.3
2765	12556.7	2765	16088.1	2765	15201.5	2765	21542.1	2765	21771.2	2765	21308	2765	21995.3
2770	12551.7	2770	16088.1	2770	15201.5	2770	21537.1	2770	21751.3	2770	21308	2770	21985.3
2775	12541.7	2775	16083.1	2775	15196.5	2775	21527.1	2775	21731.3	2775	21303	2775	21985.3
2780	12531.7	2780	16078.1	2780	15201.5	2780	21512.2	2780	21716.4	2780	21298	2780	21980.4
2785	12521.8	2785	16058.2	2785	15196.5	2785	21512.2	2785	21701.4	2785	21293	2785	21970.4
2790	12506.8	2790	16058.2	2790	15181.5	2790	21507.2	2790	21686.5	2790	21288	2790	21955.5
2795	12496.9	2795	16048.2	2795	15176.6	2795	21517.2	2795	21676.5	2795	21278.1	2795	21955.5
2800	12481.9	2800	16028.3	2800	15171.6	2800	21517.2	2800	21671.6	2800	21288	2800	21945.5
2805	12486.9	2805	16018.3	2805	15156.6	2805	21527.1	2805	21671.6	2805	21268.1	2805	21950.5
2810	12477	2810	16013.3	2810	15146.7	2810	21537.1	2810	21666.6	2810	21253.2	2810	21935.5
2815	12477	2815	16008.4	2815	15131.7	2815	21547	2815	21666.6	2815	21243.2	2815	21925.6
2820	12472	2820	15993.4	2820	15111.8	2820	21557	2820	21651.6	2820	21233.2	2820	21930.6
2825	12467	2825	15983.5	2825	15081.9	2825	21557	2825	21651.6	2825	21218.3	2825	21920.6
2830	12467	2830	15973.5	2830	15052	2830	21562	2830	21651.6	2830	21193.4	2830	21900.7
2835	12457	2835	15963.5	2835	15017.2	2835	21557	2835	21646.7	2835	21178.5	2835	21905.7
2840	12457	2840	15953.6	2840	14992.3	2840	21557	2840	21636.7	2840	21163.5	2840	21890.7
2845	12452.1	2845	15953.6	2845	14972.4	2845	21552	2845	21626.7	2845	21158.5	2845	21870.8
2850	12447.1	2850	15948.6	2850	14962.4	2850	21547	2850	21606.8	2850	21153.6	2850	21865.8
2855	12437.1	2855	15938.6	2855	14952.4	2855	21547	2855	21601.8	2855	21143.6	2855	21855.8
2860	12437.1	2860	15938.6	2860	14937.5	2860	21542.1	2860	21586.9	2860	21133.6	2860	21860.8
2865	12427.2	2865	15933.7	2865	14937.5	2865	21532.1	2865	21576.9	2865	21128.6	2865	21845.9
2870	12432.1	2870	15928.7	2870	14922.5	2870	21527.1	2870	21567	2870	21118.7	2870	21855.8
2875	12437.1	2875	15928.7	2875	14922.5	2875	21517.2	2875	21552	2875	21108.7	2875	21855.8
2880	12432.1	2880	15933.7	2880	14922.5	2880	21502.2	2880	21557	2880	21113.7	2880	21860.8
2885	12427.2	2885	15938.6	2885	14902.6	2885	21492.2	2885	21542.1	2885	21108.7	2885	21865.8
2890	12422.2	2890	15943.6	2890	14897.6	2890	21482.3	2890	21532.1	2890	21103.7	2890	21870.8
2895	12417.2	2895	15948.6	2895	14887.7	2895	21472.3	2895	21532.1	2895	21103.7	2895	21875.8
2900	12407.2	2900	15948.6	2900	14887.7	2900	21462.4	2900	21527.1	2900	21098.8	2900	21865.8
2905	12402.2	2905	15963.5	2905	14872.7	2905	21462.4	2905	21522.1	2905	21093.8	2905	21865.8
2910	12397.3	2910	15958.6	2910	14867.8	2910	21457.4	2910	21517.2	2910	21093.8	2910	21880.8
2915	12387.3	2915	15963.5	2915	14852.8	2915	21452.4	2915	21512.2	2915	21093.8	2915	21865.8
2920	12382.3	2920	15953.6	2920	14852.8	2920	21452.4	2920	21507.2	2920	21078.8	2920	21840.9
2925	12362.4	2925	15953.6	2925	14842.9	2925	21447.4	2925	21517.2	2925	21078.8	2925	21821
2930	12357.4	2930	15928.7	2930	14832.9	2930	21447.4	2930	21507.2	2930	21068.9	2930	21811
2935	12347.5	2935	15918.7	2935	14822.9	2935	21437.5	2935	21502.2	2935	21058.9	2935	21796.1
2940	12347.5	2940	15903.8	2940	14817.9	2940	21437.5	2940	21502.2	2940	21044	2940	21786.1
2945	12347.5	2945	15888.8	2945	14808	2945	21427.5	2945	21497.2	2945	21029	2945	21776.2
2950	12342.5	2950	15888.8	2950	14803	2950	21417.5	2950	21487.3	2950	21024.1	2950	21761.2
2955	12322.6	2955	15863.9	2955	14793	2955	21407.6	2955	21492.2	2955	21009.1	2955	21741.3
2960	12302.6	2960	15849	2960	14778.1	2960	21382.7	2960	21477.3	2960	20994.2	2960	21726.3
2965	12297.7	2965	15844	2965	14778.1	2965	21372.7	2965	21472.3	2965	20974.2	2965	21721.4
2970	12292.7	2970	15824.1	2970	14773.1	2970	21352.8	2970	21467.3	2970	20969.3	2970	21716.4
2975	12282.7	2975	15819.1	2975	14773.1	2975	21347.8	2975	21457.4	2975	20969.3	2975	21701.4
2980	12277.7	2980	15829.1	2980	14768.1	2980	21327.9	2980	21442.4	2980	20954.3	2980	21691.5
2985	12282.7	2985	15814.1	2985	14763.2	2985	21312.9	2985	21442.4	2985	20954.3	2985	21686.5
2990	12282.7	2990	15819.1	2990	14758.2	2990	21293	2990	21422.5	2990	20959.3	2990	21671.6
2995	12262.8	2995	15809.1	2995	14753.2	2995	21283.1	2995	21407.6	2995	20944.4	2995	21671.6
3000	12257.8	3000	15799.2	3000	14753.2	3000	21273.1	3000	21387.7	3000	20949.3	3000	21671.6
3005	12257.8	3005	15789.2	3005	14748.2	3005	21268.1	3005	21367.7	3005	20944.4	3005	21671.6
3010	12257.8	3010	15784.2	3010	14743.2	3010	21258.1	3010	21352.8	3010	20949.3	3010	21666.6
3015	12257.8	3015	15769.3	3015	14728.3	3015	21248.2	3015	21332.9	3015	20939.4	3015	21661.6
3020	12242.9	3020	15754.3	3020	14723.3	3020	21243.2	3020	21303	3020	20924.4	3020	21661.6
3025	12237.9	3025	15729.4	3025	14713.3	3025	21243.2	3025	21298	3025	20919.5	3025	21666.6
3030	12222.9	3030	15719.5	3030	14718.3	3030	21253.2	3030	21298	3030	20904.5	3030	21666.6
3035	12218	3035	15699.6	3035	14718.3	3035	21253.2	3035	21283.1	3035	20904.5	3035	21671.6
3040	12208	3040	15684.6	3040	14723.3	3040	21258.1	3040	21278.1	3040	20889.6	3040	21661.6
3045	12198	3045	15669.7	3045	14718.3	3045	21258.1	3045	21278.1	3045	20884.6	3045	21651.6
3050	12198	3050	15644.8	3050	14718.3	3050	21273.1	3050	21273.1	3050	20874.6	3050	21641.7
3055	12188.1	3055	15629.8	3055	14713.3	3055	21273.1	3055	21253.2	3055	20864.7	3055	21631.7
3060	12188.1	3060	15614.9	3060	14708.4	3060	21278.1	3060	21248.2	3060	20864.7	3060	21626.7
3065	12178.1	3065	15595	3065	14698.4	3065	21293	3065	21228.3	3065	20854.7	3065	21621.7
3070	12173.1	3070	15590	3070	14688.4	3070	21288	3070	21228.3	3070	20839.8	3070	21611.8
3075	12163.2	3075	15570.1	3075	14683.5	3075	21293	3075	21218.3	3075	20829.8	3075	21601.8
3080	12158.2	3080	15560.1	3080	14678.5	3080	21298	3080	21208.3	3080	20819.8	3080	21601.8
3085	12153.2	3085	15545.1	3085	14668.5	3085	21293	3085	21198.4	3085	20809.9	3085	21606.8
3090	12148.2	3090	15545.1	3090	14663.5	3090	21278.1	3090	21198.4	3090	20794.9	3090	21606.8
3095	12138.3	3095	15535.2	3095	14663.5	3095	21273.1	3095	21188.4	3095	20785	3095	21586.9
3100	12128.3	3100	15535.2	3100	14663.5	3100	21263.1	3100	21183.4	3100	20765	3100	21586.9
3105	12128.3	3105	15535.2	3105	14653.6	3105	21258.1	3105	21178.5	3105	20760.1	3105	21586.9
3110	12118.3	3110	15530.2	3110	14643.6	3110	21248.2	3110	21158.5	3110	20750.1	3110	21571.9
3115	12108.4	3115	15525.2	3115	14638.6	3115	21248.2	3115	21153.6	3115	20740.1	3115	21576.9
3120	12103.4	3120	15525.2	3120	14648.6	3120	21243.2	3120	21148.6	3120	20735.2	3120	21576.9
3125	12093.4	3125	15510.3	3125	14638.6	3125	21248.2	3125	21138.6	3125	20720.2	3125	21571.9
3130	12093.4	3130	15490.4	3130	14643.6	3130	21238.2	3130	21138.6	3130	20710.3	3130	21571.9
3135	12093.4	3135	15465.5	3135	14643.6	3135	21233.2	3135	21133.6	3135	20700.3	3135	21576.9
3140	12088.5	3140	15435.6	3140	14648.6	3140	21213.3	3140	21128.6	3140	20690.3	3140	21557
3145	12078.5	3145	15400.7	3145	14643.6	3145	21193.4	3145	21123.7	3145	20670.4	3145	21562
3150	12078.5	3150	15345.9	3150	14638.6	3150	21178.5	3150	21118.7	3150	20665.4	3150	21542.1
3155	12073.5	3155	15306.1	3155	14638.6	3155	21158.5	3155	21118.7	3155	20655.5	3155	21537.1
3160	12073.5	3160	15266.2	3160	14623.7	3160	21138.6	3160	21093.8	3160	20650.5	3160	21527.1
3165	12068.5	3165	15236.3	3165	14613.7	3165	21118.7	3165	21088.8	3165	20645.5	3165	21522.1
3170	12068.5	3170	15226.4	3170	14608.8	3170	21093.8	3170	21073.9	3170	20630.6	3170	21507.2
3175	12068.5	3175	15221.4	3175	14598.8	3175	21083.8	3175	21073.9	3175	20630.6	3175	21512.2
3180	12058.6	3180	15236.3	3180	14593.8	3180	21068.9	3180	21078.8	3180	20620.6	3180	21507.2
3185	12053.6	3185	15256.3	3185	14588.8	3185	21063.9	3185	21063.9	3185	20615.6	3185	21507.2
3190	12048.6	3190	15291.1	3190	14588.8	3190	21053.9	3190	21058.9	3190	20610.6	3190	21507.2
3195	12043.6	3195	15326	3195	14593.8	3195	21049	3195	21063.9	3195	20600.7	3195	21502.2
3200	12043.6	3200	15345.9	3200	14593.8	3200	21053.9	3200	21078.8	3200	20590.7	3200	21492.2
3205	12023.7	3205	15370.8	3205	14608.8	3205	21039	3205	21058.9	3205	20585.7	3205	21482.3
3210	12003.8	3210	15395.7	3210	14603.8	3210	21024.1	3210	21063.9	3210	20580.8	3210	21477.3
3215	11988.8	3215	15405.7	3215	14603.8	3215	21024.1	3215	21063.9	3215	20575.8	3215	21472.3
3220	11978.9	3220	15415.6	3220	14598.8	3220	21019.1	3220	21068.9	3220	20550.9	3220	21472.3
3225	11968.9	3225	15420.6	3225	14598.8	3225	21009.1	3225	21078.8	3225	20555.9	3225	21452.4
3230	11959	3230	15415.6	3230	14588.8	3230	21004.1	3230	21093.8	3230	20545.9	3230	21442.4
3235	11954	3235	15400.7	3235	14583.8	3235	21004.1	3235	21083.8	3235	20530.9	3235	21437.5
3240	11939	3240	15400.7	3240	14578.9	3240	20999.1	3240	21068.9	3240	20511	3240	21422.5
3245	11924.1	3245	15390.7	3245	14578.9	3245	21004.1	3245	21058.9	3245	20506	3245	21417.5
3250	11924.1	3250	15385.8	3250	14573.9	3250	21004.1	3250	21053.9	3250	20501.1	3250	21412.6
3255	11919.1	3255	15375.8	3255	14573.9	3255	21009.1	3255	21039	3255	20521	3255	21392.6
3260	11904.2	3260	15355.9	3260	14583.8	3260	21004.1	3260	21024.1	3260	20506	3260	21377.7
3265	11899.2	3265	15360.9	3265	14578.9	3265	20999.1	3265	21004.1	3265	20501.1	3265	21362.7
3270	11894.2	3270	15355.9	3270	14588.8	3270	20999.1	3270	20989.2	3270	20486.1	3270	21347.8
3275	11884.2	3275	15340.9	3275	14593.8	3275	20999.1	3275	20974.2	3275	20481.1	3275	21347.8
3280	11884.2	3280	15331	3280	14593.8	3280	20984.2	3280	20969.3	3280	20466.2	3280	21332.9
3285	11874.3	3285	15316	3285	14583.8	3285	20964.3	3285	20964.3	3285	20451.3	3285	21332.9
3290	11869.3	3290	15306.1	3290	14578.9	3290	20954.3	3290	20944.4	3290	20446.3	3290	21317.9
3295	11864.3	3295	15296.1	3295	14573.9	3295	20944.4	3295	20944.4	3295	20441.3	3295	21322.9
3300	11859.3	3300	15281.2	3300	14563.9	3300	20929.4	3300	20939.4	3300	20426.4	3300	21317.9
3305	11854.4	3305	15266.2	3305	14549	3305	20924.4	3305	20934.4	3305	20416.4	3305	21327.9
3310	11849.4	3310	15256.3	3310	14544	3310	20914.5	3310	20924.4	3310	20396.5	3310	21322.9
3315	11839.4	3315	15246.3	3315	14534	3315	20914.5	3315	20924.4	3315	20391.5	3315	21327.9
3320	11834.4	3320	15226.4	3320	14529.1	3320	20909.5	3320	20919.5	3320	20381.5	3320	21332.9
3325	11829.5	3325	15206.5	3325	14524.1	3325	20909.5	3325	20909.5	3325	20376.5	3325	21327.9
3330	11824.5	3330	15196.5	3330	14529.1	3330	20909.5	3330	20904.5	3330	20366.6	3330	21322.9
3335	11809.5	3335	15186.5	3335	14534	3335	20904.5	3335	20899.5	3335	20361.6	3335	21327.9
3340	11799.6	3340	15181.5	3340	14524.1	3340	20899.5	3340	20889.6	3340	20356.6	3340	21322.9
3345	11794.6	3345	15176.6	3345	14534	3345	20889.6	3345	20884.6	3345	20346.7	3345	21312.9
3350	11784.6	3350	15181.5	3350	14534	3350	20879.6	3350	20874.6	3350	20341.7	3350	21308
3355	11774.7	3355	15186.5	3355	14549	3355	20874.6	3355	20869.6	3355	20336.7	3355	21298
3360	11769.7	3360	15191.5	3360	14544	3360	20854.7	3360	20869.6	3360	20336.7	3360	21288
3365	11759.7	3365	15186.5	3365	14539	3365	20849.7	3365	20859.7	3365	20336.7	3365	21293
3370	11754.7	3370	15191.5	3370	14539	3370	20834.8	3370	20859.7	3370	20321.8	3370	21278.1
3375	11744.8	3375	15201.5	3375	14534	3375	20819.8	3375	20844.7	3375	20316.8	3375	21273.1
3380	11734.8	3380	15206.5	3380	14539	3380	20809.9	3380	20839.8	3380	20306.8	3380	21268.1
3385	11719.9	3385	15196.5	3385	14558.9	3385	20814.9	3385	20829.8	3385	20296.9	3385	21268.1
3390	11714.9	3390	15201.5	3390	14563.9	3390	20799.9	3390	20824.8	3390	20291.9	3390	21268.1
3395	11709.9	3395	15196.5	3395	14544	3395	20790	3395	20814.9	3395	20276.9	3395	21268.1
3400	11690	3400	15206.5	3400	14539	3400	20780	3400	20799.9	3400	20262	3400	21258.1
3405	11680	3405	15196.5	3405	14544	3405	20755.1	3405	20799.9	3405	20257	3405	21263.1
3410	11680	3410	15201.5	3410	14544	3410	20750.1	3410	20794.9	3410	20237.1	3410	21253.2
3415	11665.1	3415	15191.5	3415	14539	3415	20740.1	3415	20785	3415	20237.1	3415	21238.2
3420	11650.1	3420	15201.5	3420	14549	3420	20735.2	3420	20775	3420	20227.1	3420	21243.2
3425	11650.1	3425	15206.5	3425	14539	3425	20725.2	3425	20775	3425	20217.2	3425	21233.2
3430	11640.2	3430	15196.5	3430	14534	3430	20730.2	3430	20775	3430	20212.2	3430	21218.3
3435	11630.2	3435	15196.5	3435	14519.1	3435	20730.2	3435	20770	3435	20207.2	3435	21218.3
3440	11625.2	3440	15201.5	3440	14514.1	3440	20725.2	3440	20750.1	3440	20197.2	3440	21203.4
3445	11620.3	3445	15201.5	3445	14504.2	3445	20715.2	3445	20750.1	3445	20192.3	3445	21193.4
3450	11610.3	3450	15201.5	3450	14504.2	3450	20710.3	3450	20755.1	3450	20187.3	3450	21193.4
3455	11600.3	3455	15196.5	3455	14504.2	3455	20685.4	3455	20750.1	3455	20182.3	3455	21178.5
3460	11600.3	3460	15181.5	3460	14504.2	3460	20690.3	3460	20755.1	3460	20172.3	3460	21173.5
3465	11595.4	3465	15181.5	3465	14504.2	3465	20675.4	3465	20755.1	3465	20162.4	3465	21158.5
3470	11590.4	3470	15181.5	3470	14509.1	3470	20675.4	3470	20755.1	3470	20167.3	3470	21138.6
3475	11580.4	3475	15171.6	3475	14499.2	3475	20660.5	3475	20745.1	3475	20162.4	3475	21128.6
3480	11575.4	3480	15161.6	3480	14489.2	3480	20655.5	3480	20740.1	3480	20162.4	3480	21128.6
3485	11560.5	3485	15156.6	3485	14484.2	3485	20645.5	3485	20725.2	3485	20157.4	3485	21118.7
3490	11550.5	3490	15151.7	3490	14489.2	3490	20645.5	3490	20720.2	3490	20142.4	3490	21128.6
3495	11535.6	3495	15136.7	3495	14479.3	3495	20635.5	3495	20705.3	3495	20147.4	3495	21133.6
3500	11525.6	3500	15131.7	3500	14469.3	3500	20620.6	3500	20725.2	3500	20142.4	3500	21128.6
3505	11510.7	3505	15121.8	3505	14474.3	3505	20625.6	3505	20730.2	3505	20127.5	3505	21123.7
3510	11510.7	3510	15121.8	3510	14469.3	3510	20600.7	3510	20715.2	3510	20122.5	3510	21113.7
3515	11505.7	3515	15116.8	3515	14464.3	3515	20600.7	3515	20705.3	3515	20107.6	3515	21113.7
3520	11500.7	3520	15101.9	3520	14464.3	3520	20595.7	3520	20690.3	3520	20102.6	3520	21113.7
3525	11500.7	3525	15091.9	3525	14464.3	3525	20585.7	3525	20690.3	3525	20087.7	3525	21103.7
3530	11490.8	3530	15086.9	3530	14469.3	3530	20585.7	3530	20690.3	3530	20067.7	3530	21088.8
3535	11490.8	3535	15091.9	3535	14469.3	3535	20570.8	3535	20690.3	3535	20062.8	3535	21078.8
3540	11475.8	3540	15081.9	3540	14459.3	3540	20560.8	3540	20685.4	3540	20052.8	3540	21073.9
3545	11475.8	3545	15076.9	3545	14469.3	3545	20565.8	3545	20680.4	3545	20042.8	3545	21063.9
3550	11470.8	3550	15076.9	3550	14459.3	3550	20565.8	3550	20675.4	3550	20042.8	3550	21049
3555	11470.8	3555	15072	3555	14459.3	3555	20560.8	3555	20660.5	3555	20037.8	3555	21049
3560	11460.9	3560	15067	3560	14454.3	3560	20550.9	3560	20650.5	3560	20032.9	3560	21044
3565	11450.9	3565	15067	3565	14464.3	3565	20545.9	3565	20655.5	3565	20022.9	3565	21039
3570	11436	3570	15062	3570	14449.4	3570	20545.9	3570	20645.5	3570	20008	3570	21029
3575	11431	3575	15052	3575	14444.4	3575	20516	3575	20630.6	3575	20003	3575	21029
3580	11426	3580	15037.1	3580	14444.4	3580	20501.1	3580	20620.6	3580	19988	3580	21019.1
3585	11421	3585	15032.1	3585	14449.4	3585	20491.1	3585	20615.6	3585	19988	3585	21014.1
3590	11421	3590	15017.2	3590	14459.3	3590	20481.1	3590	20600.7	3590	19988	3590	21004.1
3595	11416	3595	15017.2	3595	14444.4	3595	20486.1	3595	20600.7	3595	19978.1	3595	21004.1
3600	11416	3600	15007.2	3600	14434.4	3600	20486.1	3600	20595.7	3600	19968.1	3600	20999.1
3605	11411.1	3605	15002.2	3605	14444.4	3605	20471.2	3605	20605.7	3605	19968.1	3605	20989.2
3610	11396.1	3610	15002.2	3610	14449.4	3610	20461.2	3610	20595.7	3610	19968.1	3610	20989.2
3615	11386.2	3615	14992.3	3615	14444.4	3615	20456.2	3615	20590.7	3615	19968.1	3615	20989.2
3620	11371.2	3620	14992.3	3620	14449.4	3620	20446.3	3620	20590.7	3620	19963.1	3620	20999.1
3625	11356.3	3625	14977.3	3625	14454.3	3625	20436.3	3625	20590.7	3625	19953.2	3625	20989.2
3630	11346.3	3630	14977.3	3630	14454.3	3630	20431.3	3630	20580.8	3630	19953.2	3630	20984.2
3635	11341.3	3635	14977.3	3635	14464.3	3635	20421.4	3635	20580.8	3635	19938.2	3635	20979.2
3640	11331.4	3640	14967.4	3640	14474.3	3640	20421.4	3640	20575.8	3640	19923.3	3640	20984.2
3645	11331.4	3645	14967.4	3645	14479.3	3645	20416.4	3645	20565.8	3645	19923.3	3645	20979.2
3650	11326.4	3650	14962.4	3650	14484.2	3650	20401.4	3650	20565.8	3650	19908.3	3650	20964.3
3655	11321.4	3655	14967.4	3655	14489.2	3655	20401.4	3655	20570.8	3655	19908.3	3655	20969.3
3660	11311.4	3660	14962.4	3660	14479.3	3660	20401.4	3660	20565.8	3660	19898.4	3660	20959.3
3665	11306.5	3665	14957.4	3665	14489.2	3665	20391.5	3665	20560.8	3665	19883.4	3665	20954.3
3670	11296.5	3670	14957.4	3670	14489.2	3670	20391.5	3670	20560.8	3670	19883.4	3670	20949.3
3675	11291.5	3675	14952.4	3675	14484.2	3675	20371.6	3675	20555.9	3675	19863.5	3675	20934.4
3680	11291.5	3680	14957.4	3680	14479.3	3680	20371.6	3680	20555.9	3680	19853.6	3680	20934.4
3685	11286.5	3685	14962.4	3685	14474.3	3685	20366.6	3685	20555.9	3685	19858.5	3685	20924.4
3690	11281.6	3690	14972.4	3690	14479.3	3690	20351.6	3690	20550.9	3690	19848.6	3690	20919.5
3695	11276.6	3695	14967.4	3695	14479.3	3695	20361.6	3695	20535.9	3695	19843.6	3695	20914.5
3700	11261.6	3700	14977.3	3700	14479.3	3700	20336.7	3700	20516	3700	19828.7	3700	20909.5
3705	11256.7	3705	14982.3	3705	14479.3	3705	20326.7	3705	20511	3705	19823.7	3705	20899.5
3710	11256.7	3710	14997.3	3710	14479.3	3710	20316.8	3710	20506	3710	19833.6	3710	20889.6
3715	11241.7	3715	14992.3	3715	14489.2	3715	20311.8	3715	20496.1	3715	19818.7	3715	20894.5
3720	11226.8	3720	14992.3	3720	14504.2	3720	20296.9	3720	20496.1	3720	19803.7	3720	20904.5
3725	11221.8	3725	14977.3	3725	14529.1	3725	20281.9	3725	20486.1	3725	19793.8	3725	20894.5
3730	11211.8	3730	14982.3	3730	14534	3730	20276.9	3730	20486.1	3730	19788.8	3730	20894.5
3735	11211.8	3735	14967.4	3735	14539	3735	20271.9	3735	20476.2	3735	19783.8	3735	20899.5
3740	11196.9	3740	14967.4	3740	14549	3740	20267	3740	20476.2	3740	19768.9	3740	20889.6
3745	11191.9	3745	14962.4	3745	14549	3745	20267	3745	20476.2	3745	19763.9	3745	20889.6
3750	11181.9	3750	14957.4	3750	14554	3750	20267	3750	20461.2	3750	19758.9	3750	20894.5
3755	11177	3755	14952.4	3755	14563.9	3755	20267	3755	20456.2	3755	19758.9	3755	20889.6
3760	11167	3760	14947.4	3760	14558.9	3760	20262	3760	20446.3	3760	19749	3760	20879.6
3765	11167	3765	14942.5	3765	14563.9	3765	20257	3765	20446.3	3765	19739	3765	20884.6
3770	11157	3770	14937.5	3770	14568.9	3770	20257	3770	20441.3	3770	19739	3770	20879.6
3775	11157	3775	14932.5	3775	14558.9	3775	20252	3775	20436.3	3775	19724.1	3775	20874.6
3780	11147.1	3780	14927.5	3780	14558.9	3780	20257	3780	20426.4	3780	19714.1	3780	20864.7
3785	11142.1	3785	14927.5	3785	14554	3785	20247	3785	20426.4	3785	19704.1	3785	20874.6
3790	11137.1	3790	14927.5	3790	14554	3790	20237.1	3790	20416.4	3790	19694.2	3790	20874.6
3795	11132.1	3795	14932.5	3795	14549	3795	20232.1	3795	20416.4	3795	19684.2	3795	20879.6
3800	11132.1	3800	14922.5	3800	14558.9	3800	20232.1	3800	20411.4	3800	19664.3	3800	20874.6
3805	11122.2	3805	14917.6	3805	14549	3805	20222.1	3805	20411.4	3805	19659.3	3805	20869.6
3810	11122.2	3810	14907.6	3810	14549	3810	20227.1	3810	20406.4	3810	19644.4	3810	20859.7
3815	11117.2	3815	14912.6	3815	14549	3815	20217.2	3815	20401.4	3815	19644.4	3815	20859.7
3820	11102.3	3820	14902.6	3820	14544	3820	20217.2	3820	20396.5	3820	19624.4	3820	20854.7
3825	11097.3	3825	14897.6	3825	14544	3825	20217.2	3825	20391.5	3825	19634.4	3825	20844.7
3830	11092.3	3830	14902.6	3830	14539	3830	20202.2	3830	20401.4	3830	19619.5	3830	20834.8
3835	11082.3	3835	14902.6	3835	14534	3835	20197.2	3835	20386.5	3835	19624.4	3835	20819.8
3840	11082.3	3840	14897.6	3840	14534	3840	20192.3	3840	20391.5	3840	19624.4	3840	20824.8
3845	11072.4	3845	14892.7	3845	14529.1	3845	20172.3	3845	20371.6	3845	19634.4	3845	20814.9
3850	11067.4	3850	14892.7	3850	14534	3850	20157.4	3850	20361.6	3850	19624.4	3850	20804.9
3855	11072.4	3855	14892.7	3855	14524.1	3855	20162.4	3855	20336.7	3855	19624.4	3855	20794.9
3860	11057.4	3860	14872.7	3860	14524.1	3860	20152.4	3860	20326.7	3860	19614.5	3860	20790
3865	11047.5	3865	14867.8	3865	14524.1	3865	20157.4	3865	20311.8	3865	19619.5	3865	20790
3870	11042.5	3870	14872.7	3870	14519.1	3870	20147.4	3870	20311.8	3870	19609.5	3870	20790
3875	11027.5	3875	14867.8	3875	14514.1	3875	20142.4	3875	20291.9	3875	19604.5	3875	20785
3880	11022.6	3880	14872.7	3880	14509.1	3880	20142.4	3880	20291.9	3880	19594.6	3880	20780
3885	11022.6	3885	14867.8	3885	14504.2	3885	20132.5	3885	20281.9	3885	19609.5	3885	20770
3890	11017.6	3890	14862.8	3890	14499.2	3890	20122.5	3890	20286.9	3890	19594.6	3890	20770
3895	11012.6	3895	14877.7	3895	14494.2	3895	20117.5	3895	20286.9	3895	19579.6	3895	20770
3900	10997.7	3900	14872.7	3900	14479.3	3900	20112.6	3900	20286.9	3900	19579.6	3900	20765
3905	10992.7	3905	14882.7	3905	14474.3	3905	20107.6	3905	20291.9	3905	19564.7	3905	20760.1
3910	10977.7	3910	14882.7	3910	14474.3	3910	20097.6	3910	20291.9	3910	19559.7	3910	20750.1
3915	10972.8	3915	14887.7	3915	14469.3	3915	20087.7	3915	20291.9	3915	19554.7	3915	20750.1
3920	10967.8	3920	14902.6	3920	14474.3	3920	20067.7	3920	20291.9	3920	19539.8	3920	20745.1
3925	10952.8	3925	14922.5	3925	14459.3	3925	20052.8	3925	20286.9	3925	19539.8	3925	20730.2
3930	10947.8	3930	14932.5	3930	14464.3	3930	20042.8	3930	20281.9	3930	19529.8	3930	20730.2
3935	10942.9	3935	14937.5	3935	14459.3	3935	20032.9	3935	20286.9	3935	19524.8	3935	20720.2
3940	10932.9	3940	14942.5	3940	14464.3	3940	20022.9	3940	20281.9	3940	19504.9	3940	20725.2
3945	10927.9	3945	14937.5	3945	14459.3	3945	20022.9	3945	20267	3945	19499.9	3945	20730.2
3950	10922.9	3950	14937.5	3950	14469.3	3950	20012.9	3950	20267	3950	19504.9	3950	20715.2
3955	10922.9	3955	14937.5	3955	14484.2	3955	20008	3955	20252	3955	19499.9	3955	20720.2
3960	10913	3960	14927.5	3960	14494.2	3960	20003	3960	20247	3960	19494.9	3960	20725.2
3965	10913	3965	14912.6	3965	14504.2	3965	20003	3965	20247	3965	19490	3965	20715.2
3970	10908	3970	14902.6	3970	14504.2	3970	19993	3970	20232.1	3970	19480	3970	20725.2
3975	10913	3975	14902.6	3975	14504.2	3975	19993	3975	20237.1	3975	19485	3975	20715.2
3980	10898	3980	14887.7	3980	14504.2	3980	19993	3980	20227.1	3980	19485	3980	20715.2
3985	10883.1	3985	14882.7	3985	14514.1	3985	19983.1	3985	20227.1	3985	19475	3985	20710.3
3990	10883.1	3990	14882.7	3990	14514.1	3990	19978.1	3990	20212.2	3990	19470	3990	20705.3
3995	10878.1	3995	14877.7	3995	14509.1	3995	19963.1	3995	20212.2	3995	19460.1	3995	20695.3
4000	10873.1	4000	14872.7	4000	14509.1	4000	19963.1	4000	20202.2	4000	19455.1	4000	20690.3
4005	10868.2	4005	14867.8	4005	14499.2	4005	19958.2	4005	20197.2	4005	19450.1	4005	20685.4
4010	10868.2	4010	14867.8	4010	14489.2	4010	19943.2	4010	20187.3	4010	19445.1	4010	20670.4
4015	10868.2	4015	14862.8	4015	14489.2	4015	19943.2	4015	20192.3	4015	19440.1	4015	20670.4
4020	10863.2	4020	14862.8	4020	14484.2	4020	19933.3	4020	20192.3	4020	19430.2	4020	20665.4
4025	10863.2	4025	14857.8	4025	14479.3	4025	19923.3	4025	20207.2	4025	19415.2	4025	20650.5
4030	10853.2	4030	14847.8	4030	14474.3	4030	19923.3	4030	20202.2	4030	19410.3	4030	20650.5
4035	10853.2	4035	14847.8	4035	14464.3	4035	19913.3	4035	20197.2	4035	19400.3	4035	20650.5
4040	10853.2	4040	14842.9	4040	14464.3	4040	19903.4	4040	20182.3	4040	19395.3	4040	20635.5
4045	10848.2	4045	14842.9	4045	14454.3	4045	19888.4	4045	20172.3	4045	19390.3	4045	20635.5
4050	10838.3	4050	14832.9	4050	14454.3	4050	19883.4	4050	20152.4	4050	19385.4	4050	20625.6
4055	10843.3	4055	14827.9	4055	14454.3	4055	19883.4	4055	20157.4	4055	19380.4	4055	20625.6
4060	10843.3	4060	14832.9	4060	14459.3	4060	19863.5	4060	20152.4	4060	19370.4	4060	20625.6
4065	10828.3	4065	14827.9	4065	14464.3	4065	19853.6	4065	20152.4	4065	19370.4	4065	20630.6
4070	10818.3	4070	14822.9	4070	14474.3	4070	19853.6	4070	20152.4	4070	19355.5	4070	20620.6
4075	10813.4	4075	14822.9	4075	14474.3	4075	19838.6	4075	20152.4	4075	19355.5	4075	20625.6
4080	10798.4	4080	14817.9	4080	14474.3	4080	19828.7	4080	20142.4	4080	19350.5	4080	20620.6
4085	10798.4	4085	14813	4085	14469.3	4085	19813.7	4085	20137.5	4085	19340.5	4085	20615.6
4090	10788.5	4090	14808	4090	14464.3	4090	19813.7	4090	20137.5	4090	19340.5	4090	20615.6
4095	10783.5	4095	14808	4095	14464.3	4095	19803.7	4095	20117.5	4095	19340.5	4095	20610.6
4100	10773.5	4100	14813	4100	14464.3	4100	19798.8	4100	20107.6	4100	19335.6	4100	20620.6
4105	10768.5	4105	14827.9	4105	14454.3	4105	19798.8	4105	20097.6	4105	19325.6	4105	20605.7
4110	10763.6	4110	14827.9	4110	14449.4	4110	19803.7	4110	20092.6	4110	19325.6	4110	20600.7
4115	10748.6	4115	14827.9	4115	14444.4	4115	19808.7	4115	20087.7	4115	19305.7	4115	20590.7
4120	10743.6	4120	14827.9	4120	14449.4	4120	19803.7	4120	20077.7	4120	19305.7	4120	20585.7
4125	10733.7	4125	14837.9	4125	14454.3	4125	19798.8	4125	20072.7	4125	19300.7	4125	20580.8
4130	10733.7	4130	14832.9	4130	14454.3	4130	19788.8	4130	20077.7	4130	19295.7	4130	20570.8
4135	10723.7	4135	14837.9	4135	14459.3	4135	19783.8	4135	20072.7	4135	19285.7	4135	20560.8
4140	10718.7	4140	14842.9	4140	14459.3	4140	19788.8	4140	20072.7	4140	19295.7	4140	20550.9
4145	10713.7	4145	14852.8	4145	14459.3	4145	19778.8	4145	20067.7	4145	19280.8	4145	20545.9
4150	10703.8	4150	14867.8	4150	14454.3	4150	19773.9	4150	20072.7	4150	19275.8	4150	20540.9
4155	10698.8	4155	14867.8	4155	14454.3	4155	19768.9	4155	20077.7	4155	19275.8	4155	20535.9
4160	10693.8	4160	14862.8	4160	14454.3	4160	19753.9	4160	20072.7	4160	19265.8	4160	20530.9
4165	10688.8	4165	14862.8	4165	14449.4	4165	19753.9	4165	20072.7	4165	19270.8	4165	20516
4170	10683.9	4170	14862.8	4170	14444.4	4170	19749	4170	20087.7	4170	19275.8	4170	20521
4175	10683.9	4175	14862.8	4175	14459.3	4175	19739	4175	20087.7	4175	19270.8	4175	20521
4180	10673.9	4180	14852.8	4180	14449.4	4180	19739	4180	20087.7	4180	19265.8	4180	20511
4185	10673.9	4185	14847.8	4185	14434.4	4185	19734	4185	20072.7	4185	19260.8	4185	20511
4190	10678.9	4190	14837.9	4190	14434.4	4190	19734	4190	20067.7	4190	19250.9	4190	20506
4195	10673.9	4195	14832.9	4195	14419.5	4195	19734	4195	20057.8	4195	19255.9	4195	20491.1
4200	10668.9	4200	14832.9	4200	14424.5	4200	19729	4200	20052.8	4200	19250.9	4200	20491.1
4205	10659	4205	14822.9	4205	14409.5	4205	19729	4205	20042.8	4205	19231	4205	20496.1
4210	10654	4210	14822.9	4210	14414.5	4210	19719.1	4210	20042.8	4210	19231	4210	20501.1
4215	10649	4215	14837.9	4215	14419.5	4215	19719.1	4215	20022.9	4215	19221	4215	20501.1
4220	10644	4220	14827.9	4220	14434.4	4220	19709.1	4220	20012.9	4220	19216	4220	20506
4225	10644	4225	14832.9	4225	14439.4	4225	19699.2	4225	20008	4225	19206.1	4225	20511
4230	10639	4230	14832.9	4230	14444.4	4230	19684.2	4230	20003	4230	19201.1	4230	20496.1
4235	10639	4235	14832.9	4235	14444.4	4235	19679.2	4235	19998	4235	19186.1	4235	20496.1
4240	10634.1	4240	14822.9	4240	14464.3	4240	19659.3	4240	19988	4240	19181.1	4240	20481.1
4245	10639	4245	14827.9	4245	14474.3	4245	19659.3	4245	19978.1	4245	19186.1	4245	20476.2
4250	10634.1	4250	14827.9	4250	14484.2	4250	19639.4	4250	19963.1	4250	19166.2	4250	20481.1
4255	10634.1	4255	14832.9	4255	14484.2	4255	19634.4	4255	19968.1	4255	19166.2	4255	20476.2
4260	10629.1	4260	14822.9	4260	14489.2	4260	19629.4	4260	19968.1	4260	19171.2	4260	20476.2
4265	10624.1	4265	14827.9	4265	14484.2	4265	19614.5	4265	19963.1	4265	19161.2	4265	20476.2
4270	10609.2	4270	14837.9	4270	14484.2	4270	19609.5	4270	19948.2	4270	19151.3	4270	20471.2
4275	10604.2	4275	14832.9	4275	14474.3	4275	19609.5	4275	19948.2	4275	19151.3	4275	20481.1
4280	10594.2	4280	14827.9	4280	14469.3	4280	19599.5	4280	19933.3	4280	19141.3	4280	20476.2
4285	10594.2	4285	14827.9	4285	14454.3	4285	19604.5	4285	19938.2	4285	19151.3	4285	20471.2
4290	10589.2	4290	14827.9	4290	14464.3	4290	19589.6	4290	19948.2	4290	19141.3	4290	20471.2
4295	10579.3	4295	14817.9	4295	14479.3	4295	19589.6	4295	19938.2	4295	19126.4	4295	20471.2
4300	10569.3	4300	14827.9	4300	14494.2	4300	19579.6	4300	19938.2	4300	19111.4	4300	20461.2
4305	10559.3	4305	14837.9	4305	14509.1	4305	19579.6	4305	19933.3	4305	19121.4	4305	20451.3
4310	10554.4	4310	14817.9	4310	14524.1	4310	19579.6	4310	19928.3	4310	19111.4	4310	20441.3
4315	10559.3	4315	14832.9	4315	14519.1	4315	19569.7	4315	19928.3	4315	19116.4	4315	20441.3
4320	10549.4	4320	14832.9	4320	14509.1	4320	19559.7	4320	19928.3	4320	19111.4	4320	20441.3
4325	10544.4	4325	14827.9	4325	14524.1	4325	19559.7	4325	19928.3	4325	19101.5	4325	20436.3
4330	10544.4	4330	14822.9	4330	14539	4330	19549.7	4330	19928.3	4330	19096.5	4330	20436.3
4335	10539.4	4335	14817.9	4335	14544	4335	19539.8	4335	19918.3	4335	19101.5	4335	20431.3
4340	10534.4	4340	14822.9	4340	14539	4340	19544.7	4340	19908.3	4340	19101.5	4340	20436.3
4345	10529.5	4345	14832.9	4345	14544	4345	19539.8	4345	19908.3	4345	19091.5	4345	20426.4
4350	10514.5	4350	14832.9	4350	14544	4350	19534.8	4350	19908.3	4350	19081.5	4350	20416.4
4355	10499.6	4355	14847.8	4355	14544	4355	19534.8	4355	19903.4	4355	19081.5	4355	20416.4
4360	10504.6	4360	14857.8	4360	14534	4360	19519.8	4360	19893.4	4360	19076.5	4360	20411.4
4365	10499.6	4365	14867.8	4365	14539	4365	19509.9	4365	19898.4	4365	19081.5	4365	20406.4
4370	10494.6	4370	14867.8	4370	14534	4370	19509.9	4370	19898.4	4370	19066.6	4370	20396.5
4375	10489.6	4375	14877.7	4375	14539	4375	19499.9	4375	19893.4	4375	19066.6	4375	20401.4
4380	10479.7	4380	14872.7	4380	14539	4380	19494.9	4380	19893.4	4380	19061.6	4380	20401.4
4385	10484.6	4385	14877.7	4385	14544	4385	19490	4385	19888.4	4385	19051.6	4385	20401.4
4390	10479.7	4390	14872.7	4390	14539	4390	19485	4390	19873.5	4390	19041.7	4390	20406.4
4395	10464.7	4395	14872.7	4395	14544	4395	19475	4395	19873.5	4395	19041.7	4395	20391.5
4400	10469.7	4400	14867.8	4400	14549	4400	19470	4400	19873.5	4400	19036.7	4400	20386.5
4405	10464.7	4405	14862.8	4405	14549	4405	19470	4405	19858.5	4405	19026.7	4405	20401.4
4410	10459.7	4410	14857.8	4410	14549	4410	19470	4410	19853.6	4410	19016.8	4410	20396.5
4415	10449.8	4415	14847.8	4415	14554	4415	19465.1	4415	19843.6	4415	19006.8	4415	20376.5
4420	10444.8	4420	14847.8	4420	14558.9	4420	19460.1	4420	19838.6	4420	19011.8	4420	20376.5
4425	10439.8	4425	14847.8	4425	14568.9	4425	19455.1	4425	19843.6	4425	19001.8	4425	20371.6
4430	10434.8	4430	14842.9	4430	14568.9	4430	19450.1	4430	19833.6	4430	18996.9	4430	20376.5
4435	10429.8	4435	14852.8	4435	14573.9	4435	19445.1	4435	19823.7	4435	18986.9	4435	20371.6
4440	10419.9	4440	14852.8	4440	14588.8	4440	19445.1	4440	19823.7	4440	18991.9	4440	20371.6
4445	10424.9	4445	14852.8	4445	14593.8	4445	19445.1	4445	19813.7	4445	18991.9	4445	20361.6
4450	10419.9	4450	14847.8	4450	14588.8	4450	19450.1	4450	19808.7	4450	18986.9	4450	20371.6
4455	10419.9	4455	14847.8	4455	14593.8	4455	19435.2	4455	19808.7	4455	18981.9	4455	20366.6
4460	10414.9	4460	14842.9	4460	14603.8	4460	19430.2	4460	19803.7	4460	18991.9	4460	20361.6
4465	10404.9	4465	14842.9	4465	14608.8	4465	19430.2	4465	19803.7	4465	18981.9	4465	20371.6
4470	10400	4470	14842.9	4470	14608.8	4470	19425.2	4470	19803.7	4470	18976.9	4470	20371.6
4475	10395	4475	14847.8	4475	14608.8	4475	19415.2	4475	19798.8	4475	18972	4475	20366.6
4480	10395	4480	14847.8	4480	14618.7	4480	19415.2	4480	19793.8	4480	18967	4480	20356.6
4485	10385	4485	14857.8	4485	14623.7	4485	19400.3	4485	19793.8	4485	18967	4485	20356.6
4490	10370.1	4490	14857.8	4490	14638.6	4490	19395.3	4490	19788.8	4490	18972	4490	20351.6
4495	10370.1	4495	14872.7	4495	14658.6	4495	19395.3	4495	19788.8	4495	18967	4495	20346.7
4500	10365.1	4500	14867.8	4500	14653.6	4500	19395.3	4500	19798.8	4500	18957	4500	20346.7
4505	10355.1	4505	14867.8	4505	14658.6	4505	19385.4	4505	19783.8	4505	18952	4505	20341.7
4510	10355.1	4510	14882.7	4510	14658.6	4510	19385.4	4510	19778.8	4510	18947	4510	20346.7
4515	10345.2	4515	14882.7	4515	14663.5	4515	19385.4	4515	19783.8	4515	18947	4515	20336.7
4520	10340.2	4520	14882.7	4520	14658.6	4520	19370.4	4520	19788.8	4520	18937.1	4520	20341.7
4525	10330.2	4525	14897.6	4525	14668.5	4525	19370.4	4525	19788.8	4525	18922.1	4525	20341.7
4530	10330.2	4530	14892.7	4530	14688.4	4530	19365.4	4530	19778.8	4530	18922.1	4530	20336.7
4535	10320.3	4535	14902.6	4535	14698.4	4535	19355.5	4535	19768.9	4535	18912.2	4535	20336.7
4540	10310.3	4540	14907.6	4540	14688.4	4540	19345.5	4540	19763.9	4540	18907.2	4540	20336.7
4545	10305.3	4545	14922.5	4545	14698.4	4545	19340.5	4545	19773.9	4545	18912.2	4545	20331.7
4550	10300.3	4550	14917.6	4550	14698.4	4550	19335.6	4550	19763.9	4550	18912.2	4550	20331.7
4555	10295.4	4555	14922.5	4555	14688.4	4555	19330.6	4555	19753.9	4555	18907.2	4555	20326.7
4560	10285.4	4560	14922.5	4560	14698.4	4560	19320.6	4560	19753.9	4560	18897.2	4560	20321.8
4565	10285.4	4565	14917.6	4565	14703.4	4565	19320.6	4565	19749	4565	18912.2	4565	20326.7
4570	10280.4	4570	14912.6	4570	14713.3	4570	19320.6	4570	19749	4570	18902.2	4570	20326.7
4575	10275.4	4575	14902.6	4575	14713.3	4575	19305.7	4575	19744	4575	18897.2	4575	20316.8
4580	10265.5	4580	14902.6	4580	14713.3	4580	19305.7	4580	19734	4580	18887.3	4580	20316.8
4585	10270.5	4585	14897.6	4585	14718.3	4585	19290.7	4585	19734	4585	18867.4	4585	20316.8
4590	10270.5	4590	14892.7	4590	14723.3	4590	19295.7	4590	19724.1	4590	18867.4	4590	20316.8
4595	10260.5	4595	14892.7	4595	14743.2	4595	19285.7	4595	19729	4595	18862.4	4595	20306.8
4600	10250.5	4600	14877.7	4600	14748.2	4600	19270.8	4600	19724.1	4600	18857.4	4600	20311.8
4605	10235.6	4605	14862.8	4605	14758.2	4605	19255.9	4605	19724.1	4605	18862.4	4605	20306.8
4610	10240.6	4610	14857.8	4610	14763.2	4610	19255.9	4610	19714.1	4610	18857.4	4610	20306.8
4615	10240.6	4615	14852.8	4615	14743.2	4615	19245.9	4615	19704.1	4615	18857.4	4615	20296.9
4620	10230.6	4620	14842.9	4620	14733.3	4620	19240.9	4620	19709.1	4620	18852.4	4620	20291.9
4625	10225.6	4625	14832.9	4625	14733.3	4625	19245.9	4625	19699.2	4625	18852.4	4625	20281.9
4630	10225.6	4630	14832.9	4630	14723.3	4630	19245.9	4630	19689.2	4630	18847.4	4630	20281.9
4635	10225.6	4635	14827.9	4635	14723.3	4635	19240.9	4635	19684.2	4635	18852.4	4635	20276.9
4640	10225.6	4640	14817.9	4640	14713.3	4640	19231	4640	19679.2	4640	18842.5	4640	20262
4645	10220.6	4645	14817.9	4645	14708.4	4645	19226	4645	19674.2	4645	18837.5	4645	20252
4650	10215.7	4650	14827.9	4650	14703.4	4650	19226	4650	19674.2	4650	18822.5	4650	20257
4655	10210.7	4655	14822.9	4655	14708.4	4655	19226	4655	19674.2	4655	18822.5	4655	20257
4660	10210.7	4660	14822.9	4660	14698.4	4660	19216	4660	19674.2	4660	18817.5	4660	20247
4665	10205.7	4665	14822.9	4665	14698.4	4665	19216	4665	19679.2	4665	18822.5	4665	20242.1
4670	10200.7	4670	14827.9	4670	14693.4	4670	19206.1	4670	19669.3	4670	18822.5	4670	20252
4675	10195.7	4675	14817.9	4675	14693.4	4675	19201.1	4675	19669.3	4675	18827.5	4675	20247
4680	10205.7	4680	14822.9	4680	14688.4	4680	19201.1	4680	19659.3	4680	18822.5	4680	20247
4685	10190.8	4685	14822.9	4685	14688.4	4685	19196.1	4685	19659.3	4685	18807.6	4685	20247
4690	10190.8	4690	14827.9	4690	14683.5	4690	19181.1	4690	19649.3	4690	18807.6	4690	20247
4695	10185.8	4695	14827.9	4695	14688.4	4695	19176.2	4695	19649.3	4695	18802.6	4695	20232.1
4700	10180.8	4700	14832.9	4700	14683.5	4700	19166.2	4700	19644.4	4700	18797.6	4700	20242.1
4705	10180.8	4705	14827.9	4705	14693.4	4705	19166.2	4705	19639.4	4705	18792.6	4705	20242.1
4710	10180.8	4710	14827.9	4710	14688.4	4710	19156.2	4710	19629.4	4710	18782.7	4710	20227.1
4715	10175.8	4715	14837.9	4715	14698.4	4715	19146.3	4715	19624.4	4715	18787.7	4715	20227.1
4720	10165.9	4720	14832.9	4720	14703.4	4720	19151.3	4720	19619.5	4720	18767.7	4720	20212.2
4725	10160.9	4725	14832.9	4725	14703.4	4725	19126.4	4725	19629.4	4725	18767.7	4725	20207.2
4730	10165.9	4730	14832.9	4730	14698.4	4730	19131.3	4730	19614.5	4730	18767.7	4730	20197.2
4735	10160.9	4735	14837.9	4735	14688.4	4735	19126.4	4735	19609.5	4735	18747.8	4735	20197.2
4740	10145.9	4740	14837.9	4740	14688.4	4740	19121.4	4740	19604.5	4740	18742.8	4740	20197.2
4745	10150.9	4745	14832.9	4745	14683.5	4745	19106.4	4745	19604.5	4745	18752.8	4745	20212.2
4750	10141	4750	14842.9	4750	14668.5	4750	19111.4	4750	19614.5	4750	18742.8	4750	20202.2
4755	10145.9	4755	14857.8	4755	14663.5	4755	19101.5	4755	19599.5	4755	18747.8	4755	20207.2
4760	10145.9	4760	14857.8	4760	14658.6	4760	19091.5	4760	19604.5	4760	18737.9	4760	20202.2
4765	10136	4765	14862.8	4765	14653.6	4765	19086.5	4765	19609.5	4765	18742.8	4765	20202.2
4770	10136	4770	14862.8	4770	14663.5	4770	19081.5	4770	19609.5	4770	18742.8	4770	20187.3
4775	10131	4775	14867.8	4775	14668.5	4775	19081.5	4775	19609.5	4775	18742.8	4775	20187.3
4780	10126	4780	14877.7	4780	14673.5	4780	19076.5	4780	19604.5	4780	18742.8	4780	20182.3
4785	10126	4785	14872.7	4785	14673.5	4785	19071.6	4785	19594.6	4785	18732.9	4785	20177.3
4790	10116.1	4790	14867.8	4790	14678.5	4790	19076.5	4790	19594.6	4790	18717.9	4790	20177.3
4795	10116.1	4795	14872.7	4795	14693.4	4795	19071.6	4795	19589.6	4795	18717.9	4795	20167.3
4800	10111.1	4800	14857.8	4800	14703.4	4800	19076.5	4800	19589.6	4800	18708	4800	20172.3
4805	10126	4805	14867.8	4805	14708.4	4805	19066.6	4805	19579.6	4805	18708	4805	20172.3
4810	10111.1	4810	14857.8	4810	14723.3	4810	19066.6	4810	19579.6	4810	18698	4810	20162.4
4815	10091.1	4815	14852.8	4815	14733.3	4815	19061.6	4815	19574.6	4815	18688	4815	20167.3
4820	10096.1	4820	14857.8	4820	14738.3	4820	19056.6	4820	19564.7	4820	18683.1	4820	20167.3
4825	10086.2	4825	14852.8	4825	14743.2	4825	19051.6	4825	19554.7	4825	18683.1	4825	20167.3
4830	10086.2	4830	14857.8	4830	14738.3	4830	19051.6	4830	19554.7	4830	18678.1	4830	20167.3
4835	10081.2	4835	14857.8	4835	14733.3	4835	19046.7	4835	19549.7	4835	18678.1	4835	20162.4
4840	10071.2	4840	14852.8	4840	14723.3	4840	19036.7	4840	19554.7	4840	18678.1	4840	20167.3
4845	10076.2	4845	14847.8	4845	14723.3	4845	19036.7	4845	19549.7	4845	18668.1	4845	20157.4
4850	10071.2	4850	14842.9	4850	14718.3	4850	19026.7	4850	19544.7	4850	18673.1	4850	20147.4
4855	10066.2	4855	14852.8	4855	14703.4	4855	19016.8	4855	19539.8	4855	18658.2	4855	20162.4
4860	10061.3	4860	14852.8	4860	14683.5	4860	19016.8	4860	19529.8	4860	18658.2	4860	20157.4
4865	10061.3	4865	14852.8	4865	14673.5	4865	19011.8	4865	19529.8	4865	18648.2	4865	20152.4
4870	10061.3	4870	14852.8	4870	14668.5	4870	19001.8	4870	19529.8	4870	18638.2	4870	20157.4
4875	10056.3	4875	14852.8	4875	14663.5	4875	19001.8	4875	19534.8	4875	18633.3	4875	20162.4
4880	10046.3	4880	14847.8	4880	14653.6	4880	18986.9	4880	19539.8	4880	18628.3	4880	20162.4
4885	10046.3	4885	14852.8	4885	14628.7	4885	18981.9	4885	19529.8	4885	18628.3	4885	20177.3
4890	10046.3	4890	14852.8	4890	14613.7	4890	18981.9	4890	19529.8	4890	18633.3	4890	20182.3
4895	10036.4	4895	14862.8	4895	14603.8	4895	18972	4895	19524.8	4895	18628.3	4895	20182.3
4900	10031.4	4900	14862.8	4900	14583.8	4900	18972	4900	19529.8	4900	18623.3	4900	20167.3
4905	10016.4	4905	14867.8	4905	14558.9	4905	18972	4905	19529.8	4905	18618.3	4905	20152.4
4910	10016.4	4910	14867.8	4910	14544	4910	18967	4910	19529.8	4910	18613.3	4910	20152.4
4915	10016.4	4915	14877.7	4915	14539	4915	18967	4915	19529.8	4915	18613.3	4915	20152.4
4920	10016.4	4920	14882.7	4920	14544	4920	18967	4920	19524.8	4920	18608.4	4920	20152.4
4925	10011.5	4925	14887.7	4925	14549	4925	18957	4925	19519.8	4925	18608.4	4925	20147.4
4930	10006.5	4930	14887.7	4930	14563.9	4930	18967	4930	19519.8	4930	18608.4	4930	20142.4
4935	10001.5	4935	14887.7	4935	14578.9	4935	18962	4935	19509.9	4935	18603.4	4935	20142.4
4940	9991.53	4940	14887.7	4940	14583.8	4940	18947	4940	19499.9	4940	18598.4	4940	20127.5
4945	9996.51	4945	14892.7	4945	14603.8	4945	18947	4945	19494.9	4945	18598.4	4945	20117.5
4950	9996.51	4950	14897.6	4950	14618.7	4950	18952	4950	19494.9	4950	18603.4	4950	20117.5
4955	9996.51	4955	14897.6	4955	14633.7	4955	18942.1	4955	19475	4955	18598.4	4955	20107.6
4960	10006.5	4960	14892.7	4960	14653.6	4960	18947	4960	19465.1	4960	18593.4	4960	20117.5
4965	10001.5	4965	14897.6	4965	14668.5	4965	18937.1	4965	19455.1	4965	18588.4	4965	20117.5
4970	9986.55	4970	14887.7	4970	14698.4	4970	18942.1	4970	19450.1	4970	18578.5	4970	20107.6
4975	9986.55	4975	14892.7	4975	14718.3	4975	18937.1	4975	19440.1	4975	18583.4	4975	20107.6
4980	9991.53	4980	14887.7	4980	14733.3	4980	18932.1	4980	19440.1	4980	18588.4	4980	20097.6
4985	9981.57	4985	14887.7	4985	14748.2	4985	18927.1	4985	19440.1	4985	18588.4	4985	20102.6
4990	9976.59	4990	14887.7	4990	14763.2	4990	18932.1	4990	19430.2	4990	18588.4	4990	20087.7
4995	9976.59	4995	14862.8	4995	14768.1	4995	18932.1	4995	19435.2	4995	18583.4	4995	20082.7
5000	9971.61	5000	14862.8	5000	14778.1	5000	18922.1	5000	19425.2	5000	18583.4	5000	20077.7
5005	9966.63	5005	14867.8	5005	14798	5005	18932.1	5005	19425.2	5005	18578.5	5005	20087.7
5010	9961.64	5010	14872.7	5010	14783.1	5010	18922.1	5010	19420.2	5010	18578.5	5010	20092.6
5015	9956.66	5015	14882.7	5015	14788.1	5015	18922.1	5015	19430.2	5015	18568.5	5015	20102.6
5020	9956.66	5020	14887.7	5020	14803	5020	18917.2	5020	19420.2	5020	18573.5	5020	20097.6
5025	9951.68	5025	14887.7	5025	14813	5025	18907.2	5025	19430.2	5025	18563.5	5025	20097.6
5030	9946.7	5030	14887.7	5030	14803	5030	18902.2	5030	19430.2	5030	18548.6	5030	20092.6
5035	9946.7	5035	14882.7	5035	14817.9	5035	18897.2	5035	19430.2	5035	18558.5	5035	20097.6
5040	9941.72	5040	14887.7	5040	14817.9	5040	18887.3	5040	19420.2	5040	18558.5	5040	20092.6
5045	9936.74	5045	14887.7	5045	14822.9	5045	18892.3	5045	19415.2	5045	18548.6	5045	20092.6
5050	9931.76	5050	14877.7	5050	14817.9	5050	18892.3	5050	19420.2	5050	18538.6	5050	20092.6
5055	9931.76	5055	14887.7	5055	14817.9	5055	18882.3	5055	19420.2	5055	18528.7	5055	20082.7
5060	9926.78	5060	14882.7	5060	14817.9	5060	18877.3	5060	19425.2	5060	18538.6	5060	20067.7
5065	9931.76	5065	14882.7	5065	14822.9	5065	18882.3	5065	19420.2	5065	18533.6	5065	20077.7
5070	9931.76	5070	14887.7	5070	14817.9	5070	18872.3	5070	19410.3	5070	18533.6	5070	20067.7
5075	9916.82	5075	14882.7	5075	14817.9	5075	18877.3	5075	19415.2	5075	18528.7	5075	20077.7
5080	9911.84	5080	14877.7	5080	14813	5080	18872.3	5080	19415.2	5080	18528.7	5080	20077.7
5085	9916.82	5085	14882.7	5085	14813	5085	18857.4	5085	19405.3	5085	18518.7	5085	20077.7
5090	9911.84	5090	14882.7	5090	14813	5090	18852.4	5090	19415.2	5090	18523.7	5090	20072.7
5095	9906.86	5095	14872.7	5095	14827.9	5095	18847.4	5095	19415.2	5095	18513.7	5095	20072.7
5100	9906.86	5100	14867.8	5100	14822.9	5100	18842.5	5100	19410.3	5100	18518.7	5100	20072.7
5105	9901.87	5105	14872.7	5105	14827.9	5105	18842.5	5105	19415.2	5105	18518.7	5105	20082.7
5110	9901.87	5110	14872.7	5110	14847.8	5110	18837.5	5110	19405.3	5110	18523.7	5110	20072.7
5115	9906.86	5115	14872.7	5115	14827.9	5115	18837.5	5115	19410.3	5115	18523.7	5115	20072.7
5120	9906.86	5120	14877.7	5120	14827.9	5120	18832.5	5120	19400.3	5120	18523.7	5120	20072.7
5125	9906.86	5125	14882.7	5125	14832.9	5125	18832.5	5125	19400.3	5125	18518.7	5125	20072.7
5130	9906.86	5130	14882.7	5130	14827.9	5130	18837.5	5130	19410.3	5130	18513.7	5130	20062.8
5135	9901.87	5135	14882.7	5135	14832.9	5135	18837.5	5135	19405.3	5135	18493.8	5135	20067.7
5140	9901.87	5140	14887.7	5140	14832.9	5140	18837.5	5140	19400.3	5140	18488.8	5140	20062.8
5145	9901.87	5145	14887.7	5145	14837.9	5145	18837.5	5145	19400.3	5145	18473.9	5145	20062.8
5150	9896.89	5150	14887.7	5150	14837.9	5150	18832.5	5150	19395.3	5150	18478.9	5150	20052.8
5155	9891.91	5155	14887.7	5155	14842.9	5155	18822.5	5155	19400.3	5155	18478.9	5155	20047.8
5160	9891.91	5160	14887.7	5160	14842.9	5160	18822.5	5160	19400.3	5160	18473.9	5160	20047.8
5165	9886.93	5165	14887.7	5165	14837.9	5165	18822.5	5165	19400.3	5165	18483.8	5165	20047.8
5170	9881.95	5170	14892.7	5170	14842.9	5170	18832.5	5170	19390.3	5170	18488.8	5170	20057.8
5175	9876.97	5175	14897.6	5175	14837.9	5175	18817.5	5175	19390.3	5175	18478.9	5175	20052.8
5180	9881.95	5180	14902.6	5180	14837.9	5180	18807.6	5180	19390.3	5180	18463.9	5180	20057.8
5185	9871.99	5185	14912.6	5185	14822.9	5185	18792.6	5185	19380.4	5185	18458.9	5185	20067.7
5190	9867.01	5190	14907.6	5190	14817.9	5190	18782.7	5190	19380.4	5190	18453.9	5190	20072.7
5195	9862.03	5195	14917.6	5195	14817.9	5195	18782.7	5195	19370.4	5195	18453.9	5195	20052.8
5200	9857.05	5200	14912.6	5200	14808	5200	18777.7	5200	19365.4	5200	18453.9	5200	20047.8
5205	9852.07	5205	14922.5	5205	14817.9	5205	18767.7	5205	19350.5	5205	18453.9	5205	20052.8
5210	9857.05	5210	14927.5	5210	14813	5210	18762.8	5210	19360.5	5210	18444	5210	20052.8
5215	9852.07	5215	14927.5	5215	14813	5215	18767.7	5215	19340.5	5215	18444	5215	20032.9
5220	9857.05	5220	14927.5	5220	14813	5220	18757.8	5220	19340.5	5220	18434	5220	20027.9
5225	9852.07	5225	14922.5	5225	14808	5225	18747.8	5225	19335.6	5225	18434	5225	20037.8
5230	9847.09	5230	14927.5	5230	14822.9	5230	18742.8	5230	19330.6	5230	18434	5230	20037.8
5235	9857.05	5235	14922.5	5235	14832.9	5235	18737.9	5235	19335.6	5235	18429	5235	20032.9
5240	9847.09	5240	14922.5	5240	14837.9	5240	18737.9	5240	19330.6	5240	18434	5240	20027.9
5245	9852.07	5245	14922.5	5245	14857.8	5245	18732.9	5245	19335.6	5245	18429	5245	20027.9
5250	9847.09	5250	14927.5	5250	14877.7	5250	18737.9	5250	19325.6	5250	18424.1	5250	20022.9
5255	9862.03	5255	14932.5	5255	14887.7	5255	18737.9	5255	19330.6	5255	18419.1	5255	20017.9
5260	9852.07	5260	14927.5	5260	14892.7	5260	18727.9	5260	19320.6	5260	18419.1	5260	20022.9
5265	9862.03	5265	14932.5	5265	14892.7	5265	18737.9	5265	19305.7	5265	18419.1	5265	20017.9
5270	9852.07	5270	14932.5	5270	14887.7	5270	18732.9	5270	19310.6	5270	18424.1	5270	20017.9
5275	9847.09	5275	14927.5	5275	14892.7	5275	18717.9	5275	19320.6	5275	18409.1	5275	20008
5280	9847.09	5280	14942.5	5280	14902.6	5280	18717.9	5280	19315.6	5280	18414.1	5280	20008
5285	9847.09	5285	14947.4	5285	14897.6	5285	18708	5285	19320.6	5285	18404.1	5285	20008
5290	9847.09	5290	14952.4	5290	14897.6	5290	18708	5290	19310.6	5290	18414.1	5290	20003
5295	9847.09	5295	14952.4	5295	14902.6	5295	18703	5295	19305.7	5295	18409.1	5295	19993
5300	9842.1	5300	14947.4	5300	14897.6	5300	18698	5300	19295.7	5300	18399.2	5300	19993
5305	9842.1	5305	14962.4	5305	14907.6	5305	18698	5305	19285.7	5305	18409.1	5305	20003
5310	9847.09	5310	14957.4	5310	14912.6	5310	18698	5310	19275.8	5310	18404.1	5310	19988
5315	9837.12	5315	14967.4	5315	14902.6	5315	18693	5315	19270.8	5315	18394.2	5315	19993
5320	9837.12	5320	14962.4	5320	14902.6	5320	18688	5320	19260.8	5320	18404.1	5320	19993
5325	9832.14	5325	14972.4	5325	14912.6	5325	18688	5325	19260.8	5325	18384.2	5325	19998
5330	9832.14	5330	14972.4	5330	14917.6	5330	18683.1	5330	19260.8	5330	18384.2	5330	19998
5335	9827.16	5335	14972.4	5335	14922.5	5335	18683.1	5335	19255.9	5335	18374.3	5335	19998
5340	9832.14	5340	14977.3	5340	14927.5	5340	18678.1	5340	19250.9	5340	18369.3	5340	20003
5345	9827.16	5345	14982.3	5345	14937.5	5345	18673.1	5345	19245.9	5345	18369.3	5345	20012.9
5350	9827.16	5350	14987.3	5350	14932.5	5350	18668.1	5350	19260.8	5350	18374.3	5350	19993
5355	9822.18	5355	14992.3	5355	14932.5	5355	18673.1	5355	19250.9	5355	18359.3	5355	19998
5360	9812.22	5360	15002.2	5360	14932.5	5360	18668.1	5360	19245.9	5360	18359.3	5360	19998
5365	9817.2	5365	14997.3	5365	14932.5	5365	18668.1	5365	19255.9	5365	18364.3	5365	20003
5370	9802.26	5370	14987.3	5370	14942.5	5370	18673.1	5370	19250.9	5370	18354.3	5370	19988
5375	9797.28	5375	14987.3	5375	14947.4	5375	18663.1	5375	19250.9	5375	18354.3	5375	19993
5380	9792.3	5380	14992.3	5380	14942.5	5380	18658.2	5380	19240.9	5380	18354.3	5380	19988
5385	9797.28	5385	14997.3	5385	14942.5	5385	18653.2	5385	19245.9	5385	18349.3	5385	19983.1
5390	9797.28	5390	14997.3	5390	14937.5	5390	18648.2	5390	19255.9	5390	18349.3	5390	19978.1
5395	9782.34	5395	14997.3	5395	14937.5	5395	18643.2	5395	19255.9	5395	18344.4
5400		5400	14987.3	5400	14937.5	5400	18633.3	5400	19250.9	5400	18344.4

## Sheet: PVIm kinetics 3.2 ppm SWCNTs 
Time(s)	qt (µg/g)	Time(s)	qt (mg/g)	Time(s)	qt (mg/g)	Time(s)	qt (mg/g)	Time(s)	qt (mg/g)	Time(s)	qt (mg/g)	Time(s)	qt (mg/g)
ppm of PVIm	39.7		41.3		47.4		53.4				60.8		78.4
PVIm:SWCNT stoichiometry	12.4:1		12.9:1		14.8:1		16.7:1		17:1		19:1		24.5:1
0	0	0	0	0.5055	0	0	0	0	0	0	0	0	0
5	1005.78	5	1087.77	0.4241	2386.63	5	1715.21	5	1319.39	5	1600.86	5	1820.76
10	1820.95	10	1858.88	0.3999	3096.17	10	2753.13	10	2169.67	10	2427.68	10	3157.74
15	2551.09	15	2140.35	0.3848	3538.9	15	3626.86	15	2719.41	15	2879.21	15	4304.15
20	2988	20	2149.14	0.3763	3788.12	20	4274.83	20	3236.91	20	3310.21	20	5043.01
25	3580.33	25	2462.87	0.3669	4063.73	25	4878.82	25	3691.37	25	3729.48	25	5567.83
30	3961.52	30	2832.29	0.3551	4409.7	30	5368.46	30	3993.36	30	4095.98	30	5893.28
35	4292.87	35	3116.7	0.3402	4846.57	35	5605.95	35	4330.54	35	4447.82	35	6207.01
40	4483.47	40	3415.76	0.32975	5152.96	40	5928.47	40	4767.4	40	4732.22	40	6582.3
45	4794.3	45	3708.96	0.32075	5416.84	45	6517.8	45	4996.1	45	4875.89	45	6942.93
50	4987.83	50	3914.2	0.31275	5651.4	50	6831.52	50	5151.49	50	4952.12	50	7174.56
55	5257.6	55	4093.05	0.3059	5852.24	55	7066.08	55	5333.28	55	5051.81	55	7373.94
60	5486.32	60	4292.42	0.2991	6051.61	60	7329.96	60	5501.86	60	5166.15	60	7573.31
65	5653.46	65	4509.39	0.292	6259.78	65	7552.79	65	5655.79	65	5274.64	65	7769.75
70	5823.53	70	4691.17	0.2861	6432.77	70	7752.16	70	5809.72	70	5383.12	70	7951.54
75	6081.57	75	4755.68	0.28145	6569.11	75	7951.54	75	5951.92	75	5503.33	75	8109.86
80	6348.41	80	4828.97	0.2762	6723.04	80	8115.73	80	6124.91	80	5641.13	80	8271.12
85	6524.35	85	5007.83	0.27085	6879.9	85	8323.9	85	6306.69	85	5770.14	85	8417.72
90	6612.32	90	5262.91	0.26465	7061.68	90	8558.46	90	6429.84	90	5881.56	90	8570.18
95	6606.45	95	5515.06	0.2594	7215.61	95	8693.33	95	6532.46	95	5978.31	95	8778.35
100	6597.65	100	5670.45	0.25625	7307.97	100	8801.81	100	6595.49	100	6048.68	100	9033.44
105	6843.97	105	5778.94	0.25345	7390.06	105	8857.52	105	6646.8	105	6121.98	105	9297.32
110	7040.43	110	5890.35	0.2507	7470.69	110	8886.84	110	6718.64	110	6209.94	110	9511.35
115	7143.06	115	5969.52	0.2482	7543.99	115	8942.55	115	6806.6	115	6336.01	115	9687.27
120	7254.49	120	6010.56	0.24615	7604.1	120	8992.39	120	6918.01	120	6491.41	120	9830.94
125	7360.05	125	6054.54	0.24335	7686.19	125	9059.83	125	7044.09	125	6664.4	125	9942.35
130	7462.68	130	6183.55	0.2381	7840.12	130	9138.99	130	7173.09	130	6802.2	130	10042
135	7553.58	135	6262.71	0.2337	7969.13	135	9259.2	135	7321.16	135	6919.48	135	10109.5
140	7647.41	140	6353.61	0.23005	8076.15	140	9438.05	140	7450.17	140	6998.64	140	10165.2
145	7744.18	145	6444.5	0.2275	8150.91	145	9616.9	145	7543.99	145	7063.15	145	10215
150	7838.01	150	6514.86	0.22635	8184.63	150	9740.05	150	7602.63	150	7121.78	150	10259
155	7934.78	155	6564.71	0.22555	8208.08	155	9798.68	155	7631.95	155	7183.36	155	10314.7
160	8049.14	160	6623.35	0.22435	8243.27	160	9795.75	160	7661.27	160	7244.93	160	10367.5
165	8160.56	165	6696.65	0.22175	8319.5	165	9792.82	165	7703.78	165	7318.23	165	10420.3
170	8239.74	170	6764.08	0.21895	8401.6	170	9804.55	170	7782.95	170	7397.39	170	10473
175	8280.79	175	6799.27	0.21725	8451.44	175	9883.71	175	7873.84	175	7482.42	175	10528.7
180	8333.57	180	6822.72	0.21605	8486.62	180	9980.47	180	7948.6	180	7567.45	180	10581.5
185	8386.35	185	6846.18	0.21495	8518.87	185	10045	185	8008.71	185	7640.75	185	10619.6
190	8456.73	190	6869.63	0.2138	8552.59	190	10091.9	190	8062.95	190	7708.18	190	10660.7
195	8544.69	195	6948.8	0.21195	8606.83	195	10132.9	195	8117.19	195	7772.68	195	10690
200	8618	200	7039.69	0.2098	8669.87	200	10176.9	200	8158.24	200	7825.46	200	10731.1
205	8700.11	205	7107.12	0.20795	8724.11	205	10206.2	205	8213.95	205	7901.69	205	10766.2
210	8752.89	210	7051.42	0.20795	8724.11	210	10241.4	210	8281.38	210	7995.52	210	10807.3
215	8791.01	215	6998.64	0.2083	8713.85	215	10282.5	215	8367.88	215	8112.79	215	10839.5
220	8811.53	220	7057.28	0.20695	8753.43	220	10338.2	220	8451.44	220	8247.67	220	10889.4
225	8837.92	225	7148.17	0.205	8810.61	225	10370.4	225	8542.33	225	8408.93	225	10945.1
230	8855.52	230	7227.34	0.20295	8870.71	230	10390.9	230	8630.29	230	8561.39	230	10992
235	8876.04	235	7300.64	0.2002	8951.34	235	10414.4	235	8706.52	235	8672.8	235	11053.6
240	8893.64	240	7403.26	0.1968	9051.03	240	10455.4	240	8791.55	240	8754.9	240	11115.1
245	8925.89	245	7494.15	0.1942	9127.26	245	10543.4	245	8858.98	245	8793.01	245	11211.9
250	8955.22	250	7535.19	0.1937	9141.92	250	10640.2	250	8898.57	250	8810.61	250	11296.9
255	8993.34	255	7520.53	0.19465	9114.07	255	10701.7	255	8904.43	255	8834.06	255	11352.6
260	9022.66	260	7526.4	0.1954	9092.08	260	10690	260	8897.1	260	8860.45	260	11390.8
265	9022.66	265	7546.92	0.19565	9084.75	265	10649	265	8886.84	265	8889.77	265	11423
270	9034.39	270	7555.72	0.1956	9086.21	270	10599.1	270	8878.04	270	8907.36	270	11452.3
275	9049.05	275	7546.92	0.1952	9097.94	275	10563.9	275	8878.04	275	8913.23	275	11478.7
280	9066.64	280	7508.81	0.19495	9105.27	280	10558.1	280	8898.57	280	8922.02	280	11513.9
285	9090.1	285	7467.76	0.1946	9115.53	285	10590.3	285	8927.89	285	8927.89	285	11546.1
290	9107.69	290	7500.01	0.19365	9143.39	290	10643.1	290	8961.6	290	8933.75	290	11601.9
295	9128.22	295	7526.4	0.1933	9153.65	295	10704.7	295	8979.2	295	8945.48	295	11660.5
300	9139.95	300	7587.97	0.19195	9193.23	300	10728.1	300	8980.66	300	8954.27	300	11710.3
305	9157.54	305	7675.93	0.19015	9246.01	305	10722.3	305	8990.92	305	8957.21	305	11748.5
310	9169.27	310	7769.75	0.1885	9294.38	310	10739.9	310	9002.65	310	8963.07	310	11780.7
315	9181	315	7834.26	0.1868	9344.23	315	10757.4	315	9011.45	315	8977.73	315	11815.9
320	9207.39	320	7887.03	0.18515	9392.61	320	10760.4	320	9045.17	320	9009.98	320	11839.3
325	9230.85	325	7907.56	0.18475	9404.33	325	10795.6	325	9075.95	325	9027.57	325	11871.6
330	9254.31	330	7895.83	0.18475	9404.33	330	10839.5	330	9093.54	330	9059.83	330	11895.1
335	9277.77	335	7901.69	0.1836	9438.05	335	10842.5	335	9117	335	9095.01	335	11921.4
340	9307.09	340	7945.67	0.18155	9498.16	340	10854.2	340	9174.17	340	9147.78	340	11953.7
345	9321.75	345	7963.26	0.1803	9534.81	345	10915.8	345	9231.35	345	9185.9	345	11994.7
350	9339.35	350	7939.81	0.1799	9546.53	350	10992	350	9278.26	350	9224.02	350	12059.2
355	9354.01	355	7966.2	0.1785	9587.58	355	11047.7	355	9314.91	355	9250.4	355	12129.6
360	9374.53	360	8027.77	0.17675	9638.89	360	11094.6	360	9358.89	360	9282.66	360	12205.8
365	9392.13	365	8083.48	0.17495	9691.67	365	11150.3	365	9391.14	365	9306.11	365	12252.8
370	9395.06	370	8101.07	0.1733	9740.05	370	11191.4	370	9426.32	370	9326.64	370	12296.7
375	9412.65	375	8104	0.1718	9784.02	375	11241.2	375	9467.37	375	9329.57	375	12305.5
380	9427.31	380	8130.39	0.17	9836.8	380	11320.4	380	9509.88	380	9329.57	380	12302.6
385	9444.91	385	8156.77	0.16825	9888.11	385	11405.4	385	9546.53	385	9323.7	385	12290.9
390	9465.43	390	8177.3	0.1667	9933.56	390	11484.6	390	9581.72	390	9317.84	390	12261.5
395	9491.82	395	8191.96	0.1653	9974.6	395	11560.8	395	9608.11	395	9300.25	395	12249.8
400	9527.01	400	8200.75	0.1644	10001	400	11631.2	400	9635.96	400	9288.52	400	12252.8
405	9553.4	405	8218.35	0.1638	10018.6	405	11698.6	405	9647.69	405	9268	405	12249.8
410	9585.66	410	8235.94	0.1633	10033.2	410	11742.6	410	9640.36	410	9235.74	410	12244
415	9614.98	415	8233.01	0.1634	10030.3	415	11760.2	415	9631.56	415	9206.42	415	12246.9
420	9638.44	420	8265.26	0.1633	10033.2	420	11771.9	420	9612.5	420	9171.24	420	12261.5
425	9658.97	425	8309.24	0.16305	10040.6	425	11769	425	9587.58	425	9147.78	425	12282.1
430	9673.63	430	8362.01	0.1623	10062.6	430	11742.6	430	9561.19	430	9124.33	430	12331.9
435	9688.29	435	8447.04	0.16075	10108	435	11713.3	435	9550.93	435	9112.6	435	12367.1
440	9697.08	440	8535	0.1591	10156.4	440	11704.5	440	9550.93	440	9106.74	440	12405.2
445	9697.08	445	8599.5	0.15765	10198.9	445	11710.3	445	9559.73	445	9115.53	445	12446.3
450	9694.15	450	8652.28	0.15595	10248.7	450	11719.1	450	9584.65	450	9144.85	450	12484.4
455	9688.29	455	8690.4	0.15485	10281	455	11739.7	455	9633.03	455	9194.7	455	12510.8
460	9685.36	460	8716.78	0.1542	10300.1	460	11786.6	460	9685.8	460	9273.86	460	12522.5
465	9685.36	465	8731.44	0.15365	10316.2	465	11813	465	9732.72	465	9355.96	465	12516.6
470	9688.29	470	8798.88	0.1518	10370.4	470	11824.7	470	9775.23	470	9423.39	470	12513.7
475	9691.22	475	8889.77	0.14905	10451.1	475	11842.3	475	9825.07	475	9482.03	475	12510.8
480	9702.95	480	8848.72	0.1485	10467.2	480	11883.3	480	9885.18	480	9531.87	480	12516.6
485	9708.81	485	8816.47	0.1478	10487.7	485	11953.7	485	9945.28	485	9578.79	485	12525.4
490	9720.54	490	8836.99	0.1461	10537.5	490	12027	490	10002.5	490	9619.83	490	12537.2
495	9732.27	495	8866.31	0.1445	10584.5	495	12100.3	495	10049.4	495	9634.49	495	12554.7
500	9741.07	500	8892.7	0.1431	10625.5	500	12179.5	500	10089	500	9649.15	500	12575.3
505	9755.73	505	8910.29	0.14225	10650.4	505	12244	505	10124.1	505	9663.81	505	12601.7
510	9764.53	510	8919.09	0.1422	10651.9	510	12299.7	510	10141.7	510	9666.75	510	12619.3
515	9773.32	515	8922.02	0.1424	10646	515	12331.9	515	10143.2	515	9675.54	515	12619.3
520	9779.19	520	8936.68	0.1423	10649	520	12326.1	520	10141.7	520	9687.27	520	12604.6
525	9796.78	525	8957.21	0.1419	10660.7	525	12311.4	525	10147.6	525	9707.79	525	12592.9
530	9799.72	530	8960.14	0.1419	10660.7	530	12302.6	530	10162.3	530	9734.18	530	12581.1
535	9811.44	535	8966	0.1419	10660.7	535	12305.5	535	10163.7	535	9740.05	535	12581.1
540	9826.11	540	8963.07	0.1422	10651.9	540	12302.6	540	10159.3	540	9737.11	540	12589.9
545	9840.77	545	8957.21	0.14275	10635.8	545	12296.7	545	10147.6	545	9728.32	545	12592.9
550	9858.36	550	8948.41	0.1432	10622.6	550	12282.1	550	10134.4	550	9728.32	550	12607.5
555	9875.95	555	8936.68	0.14335	10618.2	555	12255.7	555	10124.1	555	9725.39	555	12628
560	9887.68	560	8898.57	0.1438	10605	560	12238.1	560	10127.1	560	9728.32	560	12651.5
565	9893.55	565	8836.99	0.1449	10572.7	565	12241	565	10140.3	565	9742.98	565	12663.2
570	9896.48	570	8781.29	0.14605	10539	570	12252.8	570	10138.8	570	9742.98	570	12660.3
575	9908.21	575	8754.9	0.1465	10525.8	575	12249.8	575	10138.8	575	9754.7	575	12657.4
580	9896.48	580	8784.22	0.1461	10537.5	580	12238.1	580	10135.9	580	9748.84	580	12648.6
585	9875.95	585	8834.06	0.14505	10568.3	585	12238.1	585	10137.3	585	9757.64	585	12631
590	9852.5	590	8895.63	0.1436	10610.8	590	12232.2	590	10146.1	590	9763.5	590	12604.6
595	9826.11	595	8936.68	0.14295	10629.9	595	12244	595	10165.2	595	9778.16	595	12563.5
600	9826.11	600	8968.93	0.14235	10647.5	600	12267.4	600	10174	600	9798.68	600	12513.7
605	9829.04	605	9001.19	0.1413	10678.3	605	12264.5	605	10188.6	605	9825.07	605	12455.1
610	9852.5	610	9024.64	0.1403	10707.6	610	12267.4	610	10218	610	9854.39	610	12378.8
615	9887.68	615	9039.3	0.1395	10731.1	615	12296.7	615	10248.7	615	9880.78	615	12320.2
620	9928.74	620	9056.89	0.13885	10750.1	620	12331.9	620	10278.1	620	9907.17	620	12246.9
625	9969.79	625	9074.49	0.1381	10772.1	625	12364.2	625	10297.1	625	9924.76	625	12191.2
630	9996.18	630	9074.49	0.13765	10785.3	630	12384.7	630	10319.1	630	9942.35	630	12150.1
635	10010.8	635	9080.35	0.13725	10797	635	12411.1	635	10338.2	635	9954.08	635	12117.9
640	10031.4	640	9086.21	0.1371	10801.4	640	12437.5	640	10348.4	640	9957.01	640	12097.4
645	10043.1	645	9095.01	0.13735	10794.1	645	12455.1	645	10355.8	645	9968.74	645	12073.9
650	10057.8	650	9095.01	0.13785	10779.4	650	12458	650	10348.4	650	9977.54	650	12065.1
655	10066.6	655	9100.87	0.13825	10767.7	655	12434.5	655	10333.8	655	9977.54	655	12068
660	10081.2	660	9100.87	0.13865	10756	660	12405.2	660	10311.8	660	9962.88	660	12071
665	10090	665	9092.08	0.13895	10747.2	665	12375.9	665	10294.2	665	9951.15	665	12062.2
670	10090	670	9092.08	0.13955	10729.6	670	12352.4	670	10279.5	670	9930.62	670	12065.1
675	10087.1	675	9103.8	0.14055	10700.3	675	12343.6	675	10257.5	675	9921.83	675	12085.6
680	10069.5	680	9118.46	0.1414	10675.3	680	12308.5	680	10220.9	680	9918.9	680	12112
685	10060.7	685	9133.12	0.1416	10669.5	685	12238.1	685	10182.8	685	9907.17	685	12153.1
690	10063.6	690	9147.78	0.1414	10675.3	690	12173.6	690	10171	690	9910.1	690	12191.2
695	10066.6	695	9159.51	0.141	10687.1	695	12147.2	695	10168.1	695	9907.17	695	12241
700	10060.7	700	9171.24	0.1403	10707.6	700	12144.3	700	10184.2	700	9927.69	700	12302.6
705	10069.5	705	9194.7	0.139	10745.7	705	12156	705	10215	705	9959.94	705	12358.3
710	10072.4	710	9232.81	0.1375	10789.7	710	12185.3	710	10251.7	710	9980.47	710	12422.8
715	10063.6	715	9270.93	0.13585	10838.1	715	12238.1	715	10294.2	715	10015.7	715	12496.1
720	10075.4	720	9300.25	0.1344	10880.6	720	12287.9	720	10335.2	720	10039.1	720	12566.5
725	10090	725	9320.77	0.13325	10914.3	725	12346.6	725	10377.8	725	10068.4	725	12639.8
730	10092.9	730	9332.5	0.1326	10933.4	730	12402.3	730	10412.9	730	10091.9	730	12704.3
735	10087.1	735	9344.23	0.13195	10952.4	735	12449.2	735	10443.7	735	10127.1	735	12771.7
740	10078.3	740	9355.96	0.13135	10970	740	12475.6	740	10471.6	740	10156.4	740	12824.5
745	10016.7	745	9367.68	0.13095	10981.7	745	12502	745	10490.6	745	10171	745	12871.4
750	9858.36	750	9373.55	0.1307	10989.1	750	12525.4	750	10508.2	750	10194.5	750	12909.5
755	9585.66	755	9370.62	0.1307	10989.1	755	12537.2	755	10521.4	755	10212.1	755	12912.4
760	9236.72	760	9364.75	0.1306	10992	760	12546	760	10530.2	760	10226.8	760	12894.9
765	9019.73	765	9358.89	0.13045	10996.4	765	12548.9	765	10543.4	765	10241.4	765	12880.2
770	9010.93	770	9358.89	0.1305	10994.9	770	12560.6	770	10556.6	770	10253.1	770	12874.3
775	9195.66	775	9361.82	0.1307	10989.1	775	12575.3	775	10561	775	10264.9	775	12889
780	9474.23	780	9367.68	0.1308	10986.1	780	12572.3	780	10562.5	780	10282.5	780	12912.4
785	9773.32	785	9370.62	0.1308	10986.1	785	12557.7	785	10566.9	785	10303	785	12924.2
790	9993.25	790	9370.62	0.1305	10994.9	790	12546	790	10569.8	790	10311.8	790	12935.9
795	10142.8	795	9364.75	0.1303	11000.8	795	12543	795	10584.5	795	10323.5	795	12944.7
800	10207.3	800	9361.82	0.1302	11003.7	800	12560.6	800	10597.6	800	10332.3	800	12944.7
805	10239.6	805	9353.02	0.13035	10999.3	805	12578.2	805	10609.4	805	10347	805	12941.8
810	10236.6	810	9341.3	0.1304	10997.9	810	12587	810	10619.6	810	10367.5	810	12941.8
815	10222	815	9335.43	0.13025	11002.3	815	12587	815	10629.9	815	10379.2	815	12941.8
820	10210.2	820	9323.7	0.1303	11000.8	820	12595.8	820	10651.9	820	10408.5	820	12935.9
825	10172.1	825	9311.98	0.13045	10996.4	825	12610.5	825	10663.6	825	10423.2	825	12921.2
830	10134	830	9306.11	0.13035	10999.3	830	12619.3	830	10676.8	830	10446.7	830	12906.6
835	10090	835	9311.98	0.13015	11005.2	835	12622.2	835	10691.5	835	10464.2	835	12900.7
840	10025.5	840	9326.64	0.12965	11019.9	840	12633.9	840	10706.1	840	10487.7	840	12900.7
845	9952.19	845	9332.5	0.12905	11037.4	845	12639.8	845	10728.1	845	10517	845	12897.8
850	9875.95	850	9335.43	0.1284	11056.5	850	12654.4	850	10760.4	850	10552.2	850	12906.6
855	9796.78	855	9326.64	0.1278	11074.1	855	12683.8	855	10797	855	10590.3	855	12918.3
860	9738.14	860	9311.98	0.12805	11066.8	860	12718.9	860	10830.7	860	10613.8	860	12921.2
865	9708.81	865	9309.04	0.128	11068.2	865	12762.9	865	10843.9	865	10640.2	865	12933
870	9708.81	870	9332.5	0.12765	11078.5	870	12762.9	870	10852.7	870	10651.9	870	12938.8
875	9735.2	875	9379.41	0.127	11097.6	875	12768.8	875	10854.2	875	10657.8	875	12944.7
880	9767.46	880	9385.28	0.1266	11109.3	880	12765.9	880	10852.7	880	10663.6	880	12956.4
885	9811.44	885	9341.3	0.127	11097.6	885	12757.1	885	10864.5	885	10669.5	885	12953.5
890	9864.23	890	9311.98	0.1277	11077	890	12774.6	890	10876.2	890	10672.4	890	12944.7
895	9928.74	895	9320.77	0.12805	11066.8	895	12795.2	895	10871.8	895	10675.3	895	12924.2
900	9987.38	900	9335.43	0.12825	11060.9	900	12783.4	900	10864.5	900	10690	900	12906.6
905	10028.4	905	9344.23	0.1282	11062.4	905	12754.1	905	10855.7	905	10698.8	905	12889
910	10066.6	910	9353.02	0.1281	11065.3	910	12727.7	910	10855.7	910	10704.7	910	12877.3
915	10092.9	915	9358.89	0.12795	11069.7	915	12721.9	915	10858.6	915	10713.5	915	12859.7
920	10104.7	920	9364.75	0.12775	11075.6	920	12718.9	920	10863	920	10719.3	920	12850.9
925	10119.3	925	9367.68	0.12775	11075.6	925	12721.9	925	10865.9	925	10719.3	925	12833.3
930	10134	930	9364.75	0.12805	11066.8	930	12727.7	930	10857.1	930	10704.7	930	12821.6
935	10148.7	935	9364.75	0.1286	11050.6	935	12724.8	935	10839.5	935	10684.1	935	12833.3
940	10163.3	940	9367.68	0.12905	11037.4	940	12710.1	940	10811.7	940	10660.7	940	12792.2
945	10166.3	945	9367.68	0.1295	11024.3	945	12677.9	945	10780.9	945	10628.4	945	12677.9
950	10172.1	950	9379.41	0.1297	11018.4	950	12648.6	950	10758.9	950	10610.8	950	12592.9
955	10178	955	9388.21	0.12975	11016.9	955	12622.2	955	10735.5	955	10587.4	955	12534.2
960	10195.6	960	9397	0.1297	11018.4	960	12598.7	960	10723.7	960	10575.7	960	12478.5
965	10207.3	965	9405.8	0.1294	11027.2	965	12587	965	10731.1	965	10596.2	965	12434.5
970	10216.1	970	9411.66	0.1292	11033	970	12581.1	970	10744.2	970	10613.8	970	12416.9
975	10222	975	9414.6	0.1289	11041.8	975	12589.9	975	10761.8	975	10643.1	975	12419.9
980	10230.8	980	9405.8	0.1288	11044.8	980	12595.8	980	10785.3	980	10675.3	980	12449.2
985	10236.6	985	9397	0.1287	11047.7	985	12610.5	985	10802.9	985	10695.9	985	12475.6
990	10230.8	990	9391.14	0.1287	11047.7	990	12625.1	990	10819	990	10713.5	990	12504.9
995	10230.8	995	9382.34	0.1289	11041.8	995	12639.8	995	10826.3	995	10722.3	995	12543
1000	10227.8	1000	9364.75	0.12935	11028.7	1000	12645.6	1000	10830.7	1000	10734	1000	12581.1
1005	10230.8	1005	9344.23	0.12965	11019.9	1005	12642.7	1005	10829.3	1005	10739.9	1005	12610.5
1010	10233.7	1010	9335.43	0.13035	10999.3	1010	12633.9	1010	10836.6	1010	10751.6	1010	12628
1015	10236.6	1015	9317.84	0.1312	10974.4	1015	12636.8	1015	10821.9	1015	10754.5	1015	12636.8
1020	10242.5	1020	9311.98	0.1322	10945.1	1020	12604.6	1020	10807.3	1020	10757.4	1020	12654.4
1025	10248.4	1025	9300.25	0.1334	10909.9	1025	12572.3	1025	10783.8	1025	10763.3	1025	12666.2
1030	10260.1	1030	9300.25	0.1343	10883.5	1030	12519.6	1030	10760.4	1030	10775	1030	12675
1035	10271.8	1035	9303.18	0.135	10863	1035	12460.9	1035	10734	1035	10775	1035	12672
1040	10280.6	1040	9323.7	0.1355	10848.3	1040	12408.1	1040	10717.9	1040	10786.8	1040	12672
1045	10289.4	1045	9355.96	0.1355	10848.3	1045	12364.2	1045	10701.7	1045	10804.4	1045	12672
1050	10295.3	1050	9373.55	0.1355	10848.3	1050	12314.3	1050	10691.5	1050	10816.1	1050	12677.9
1055	10283.5	1055	9376.48	0.13585	10838.1	1055	12282.1	1055	10685.6	1055	10821.9	1055	12686.7
1060	10271.8	1060	9367.68	0.13645	10820.5	1060	12264.5	1060	10673.9	1060	10821.9	1060	12686.7
1065	10248.4	1065	9350.09	0.13715	10800	1065	12241	1065	10663.6	1065	10827.8	1065	12686.7
1070	10224.9	1070	9338.36	0.13755	10788.2	1070	12214.6	1070	10654.8	1070	10833.7	1070	12686.7
1075	10210.2	1075	9329.57	0.13765	10785.3	1075	12191.2	1075	10649	1075	10833.7	1075	12680.8
1080	10195.6	1080	9329.57	0.137	10804.4	1080	12179.5	1080	10654.8	1080	10842.5	1080	12677.9
1085	10195.6	1085	9332.5	0.13615	10829.3	1085	12182.4	1085	10676.8	1085	10848.3	1085	12677.9
1090	10216.1	1090	9344.23	0.135	10863	1090	12220.5	1090	10704.7	1090	10857.1	1090	12672
1095	10248.4	1095	9347.16	0.1343	10883.5	1095	12267.4	1095	10735.5	1095	10863	1095	12672
1100	10271.8	1100	9350.09	0.13415	10887.9	1100	12323.1	1100	10757.4	1100	10868.9	1100	12672
1105	10292.3	1105	9350.09	0.13435	10882.1	1105	12361.2	1105	10758.9	1105	10865.9	1105	12666.2
1110	10315.8	1110	9353.02	0.13475	10870.3	1110	12367.1	1110	10756	1110	10871.8	1110	12663.2
1115	10327.5	1115	9350.09	0.13505	10861.5	1115	12355.4	1115	10741.3	1115	10868.9	1115	12654.4
1120	10339.3	1120	9353.02	0.1354	10851.3	1120	12329	1120	10725.2	1120	10851.3	1120	12642.7
1125	10348.1	1125	9350.09	0.1358	10839.5	1125	12314.3	1125	10709.1	1125	10842.5	1125	12631
1130	10362.7	1130	9353.02	0.1359	10836.6	1130	12290.9	1130	10697.3	1130	10839.5	1130	12613.4
1135	10356.9	1135	9344.23	0.1361	10830.7	1135	12270.3	1135	10691.5	1135	10836.6	1135	12598.7
1140	10342.2	1140	9341.3	0.13585	10838.1	1140	12261.5	1140	10685.6	1140	10827.8	1140	12589.9
1145	10327.5	1145	9338.36	0.13565	10843.9	1145	12258.6	1145	10687.1	1145	10813.2	1145	12589.9
1150	10315.8	1150	9332.5	0.1352	10857.1	1150	12276.2	1150	10691.5	1150	10807.3	1150	12587
1155	10301.1	1155	9326.64	0.13445	10879.1	1155	12290.9	1155	10701.7	1155	10795.6	1155	12587
1160	10286.5	1160	9306.11	0.1342	10886.5	1160	12323.1	1160	10722.3	1160	10786.8	1160	12587
1165	10274.7	1165	9256.27	0.13475	10870.3	1165	12373	1165	10738.4	1165	10783.8	1165	12581.1
1170	10271.8	1170	9191.76	0.13575	10841	1170	12408.1	1170	10750.1	1170	10789.7	1170	12575.3
1175	10263	1175	9171.24	0.13615	10829.3	1175	12425.7	1175	10756	1175	10795.6	1175	12572.3
1180	10248.4	1180	9206.42	0.1357	10842.5	1180	12431.6	1180	10757.4	1180	10801.4	1180	12578.2
1185	10227.8	1185	9241.61	0.13525	10855.7	1185	12428.7	1185	10757.4	1185	10810.2	1185	12581.1
1190	10216.1	1190	9270.93	0.135	10863	1190	12419.9	1190	10757.4	1190	10819	1190	12581.1
1195	10192.6	1195	9256.27	0.1356	10845.4	1195	12411.1	1195	10754.5	1195	10827.8	1195	12578.2
1200	10166.3	1200	9241.61	0.13645	10820.5	1200	12396.4	1200	10751.6	1200	10842.5	1200	12581.1
1205	10145.7	1205	9226.95	0.1374	10792.6	1205	12375.9	1205	10741.3	1205	10857.1	1205	12581.1
1210	10151.6	1210	9218.15	0.1387	10754.5	1210	12340.7	1210	10729.6	1210	10874.7	1210	12581.1
1215	10163.3	1215	9212.29	0.1403	10707.6	1215	12299.7	1215	10703.2	1215	10889.4	1215	12569.4
1220	10198.5	1220	9212.29	0.14205	10656.3	1220	12232.2	1220	10663.6	1220	10898.2	1220	12566.5
1225	10233.7	1225	9212.29	0.1437	10607.9	1225	12144.3	1225	10613.8	1225	10901.1	1225	12560.6
1230	10274.7	1230	9215.22	0.1448	10575.7	1230	12041.7	1230	10571.3	1230	10912.8	1230	12551.8
1235	10324.6	1235	9218.15	0.14535	10559.5	1235	11944.9	1235	10539	1235	10915.8	1235	12534.2
1240	10374.4	1240	9232.81	0.14505	10568.3	1240	11877.5	1240	10522.9	1240	10918.7	1240	12519.6
1245	10403.8	1245	9244.54	0.1444	10587.4	1245	11842.3	1245	10522.9	1245	10915.8	1245	12502
1250	10418.4	1250	9253.34	0.1436	10610.8	1250	11845.2	1250	10527.3	1250	10898.2	1250	12487.3
1255	10415.5	1255	9259.2	0.14315	10624	1255	11871.6	1255	10536.1	1255	10877.7	1255	12472.7
1260	10409.6	1260	9265.06	0.14265	10638.7	1260	11909.7	1260	10534.6	1260	10854.2	1260	12463.9
1265	10397.9	1265	9273.86	0.1422	10651.9	1265	11930.2	1265	10534.6	1265	10830.7	1265	12455.1
1270	10389.1	1270	9294.38	0.1416	10669.5	1270	11953.7	1270	10533.1	1270	10810.2	1270	12428.7
1275	10380.3	1275	9311.98	0.1408	10692.9	1275	11971.3	1275	10531.7	1275	10792.6	1275	12405.2
1280	10377.4	1280	9317.84	0.1405	10701.7	1280	11985.9	1280	10537.5	1280	10775	1280	12384.7
1285	10368.6	1285	9311.98	0.14035	10706.1	1285	12015.3	1285	10539	1285	10766.2	1285	12373
1290	10383.2	1290	9306.11	0.14035	10706.1	1290	12027	1290	10547.8	1290	10769.2	1290	12384.7
1295	10400.8	1295	9306.11	0.14055	10700.3	1295	12041.7	1295	10549.3	1295	10766.2	1295	12408.1
1300	10403.8	1300	9309.04	0.1408	10692.9	1300	12047.5	1300	10540.5	1300	10760.4	1300	12367.1
1305	10412.6	1305	9309.04	0.141	10687.1	1305	12035.8	1305	10527.3	1305	10751.6	1305	12305.5
1310	10427.2	1310	9314.91	0.1411	10684.1	1310	12018.2	1310	10515.6	1310	10739.9	1310	12267.4
1315	10439	1315	9317.84	0.14095	10688.5	1315	12006.5	1315	10505.3	1315	10731.1	1315	12249.8
1320	10453.6	1320	9311.98	0.14105	10685.6	1320	11994.7	1320	10502.4	1320	10719.3	1320	12246.9
1325	10477.1	1325	9297.32	0.1413	10678.3	1325	12000.6	1325	10496.5	1325	10707.6	1325	12229.3
1330	10500.5	1330	9294.38	0.1416	10669.5	1330	12000.6	1330	10493.6	1330	10701.7	1330	12226.4
1335	10500.5	1335	9288.52	0.1419	10660.7	1335	12000.6	1335	10483.3	1335	10695.9	1335	12229.3
1340	10500.5	1340	9285.59	0.1422	10651.9	1340	11985.9	1340	10474.5	1340	10690	1340	12238.1
1345	10500.5	1345	9291.45	0.14235	10647.5	1345	11974.2	1345	10468.6	1345	10692.9	1345	12249.8
1350	10500.5	1350	9294.38	0.14235	10647.5	1350	11959.6	1350	10462.8	1350	10695.9	1350	12267.4
1355	10488.8	1355	9297.32	0.14235	10647.5	1355	11944.9	1355	10459.8	1355	10692.9	1355	12282.1
1360	10485.9	1360	9306.11	0.14225	10650.4	1360	11942	1360	10461.3	1360	10698.8	1360	12293.8
1365	10485.9	1365	9314.91	0.14215	10653.4	1365	11939	1365	10459.8	1365	10698.8	1365	12311.4
1370	10485.9	1370	9323.7	0.1419	10660.7	1370	11936.1	1370	10465.7	1370	10713.5	1370	12329
1375	10482.9	1375	9341.3	0.1415	10672.4	1375	11933.2	1375	10470.1	1375	10716.4	1375	12337.8
1380	10480	1380	9355.96	0.1412	10681.2	1380	11939	1380	10471.6	1380	10713.5	1380	12337.8
1385	10488.8	1385	9361.82	0.1411	10684.1	1385	11944.9	1385	10473	1385	10713.5	1385	12346.6
1390	10494.7	1390	9358.89	0.1412	10681.2	1390	11947.8	1390	10473	1390	10713.5	1390	12358.3
1395	10485.9	1395	9361.82	0.1409	10690	1395	11947.8	1395	10470.1	1395	10710.5	1395	12370
1400	10491.7	1400	9367.68	0.1408	10692.9	1400	11944.9	1400	10477.4	1400	10710.5	1400	12384.7
1405	10506.4	1405	9358.89	0.14095	10688.5	1405	11959.6	1405	10473	1405	10701.7	1405	12393.5
1410	10521.1	1410	9350.09	0.1409	10690	1410	11959.6	1410	10470.1	1410	10695.9	1410	12402.3
1415	10538.7	1415	9350.09	0.1404	10704.7	1415	11959.6	1415	10467.2	1415	10678.3	1415	12402.3
1420	10568	1420	9347.16	0.1402	10710.5	1420	11971.3	1420	10477.4	1420	10669.5	1420	12405.2
1425	10576.8	1425	9335.43	0.1402	10710.5	1425	12000.6	1425	10480.4	1425	10660.7	1425	12411.1
1430	10582.6	1430	9320.77	0.14045	10703.2	1430	12015.3	1430	10483.3	1430	10654.8	1430	12408.1
1435	10594.4	1435	9303.18	0.14085	10691.5	1435	12027	1435	10480.4	1435	10649	1435	12411.1
1440	10606.1	1440	9294.38	0.14115	10682.7	1440	12027	1440	10474.5	1440	10643.1	1440	12411.1
1445	10612	1445	9282.66	0.1413	10678.3	1445	12021.1	1445	10470.1	1445	10643.1	1445	12405.2
1450	10612	1450	9268	0.1415	10672.4	1450	12012.3	1450	10470.1	1450	10640.2	1450	12399.4
1455	10609	1455	9253.34	0.14145	10673.9	1455	12015.3	1455	10470.1	1455	10637.2	1455	12399.4
1460	10612	1460	9235.74	0.14155	10670.9	1460	12018.2	1460	10474.5	1460	10628.4	1460	12390.6
1465	10620.8	1465	9224.02	0.14155	10670.9	1465	12035.8	1465	10476	1465	10619.6	1465	12384.7
1470	10620.8	1470	9206.42	0.1418	10663.6	1470	12047.5	1470	10476	1470	10607.9	1470	12381.8
1475	10614.9	1475	9185.9	0.14235	10647.5	1475	12059.2	1475	10474.5	1475	10602	1475	12373
1480	10612	1480	9177.1	0.14325	10621.1	1480	12062.2	1480	10467.2	1480	10599.1	1480	12370
1485	10609	1485	9168.31	0.1445	10584.5	1485	12050.4	1485	10442.3	1485	10593.3	1485	12378.8
1490	10606.1	1490	9159.51	0.1458	10546.3	1490	12006.5	1490	10410	1490	10593.3	1490	12364.2
1495	10620.8	1495	9150.72	0.14645	10527.3	1495	11942	1495	10377.8	1495	10596.2	1495	12358.3
1500	10612	1500	9147.78	0.1465	10525.8	1500	11874.5	1500	10364.6	1500	10599.1	1500	12349.5
1505	10559.2	1505	9138.99	0.14635	10530.2	1505	11845.2	1505	10364.6	1505	10599.1	1505	12340.7
1510	10526.9	1510	9133.12	0.1461	10537.5	1510	11845.2	1510	10377.8	1510	10607.9	1510	12337.8
1515	10497.6	1515	9130.19	0.1457	10549.3	1515	11862.8	1515	10380.7	1515	10593.3	1515	12326.1
1520	10480	1520	9118.46	0.1454	10558.1	1520	11883.3	1520	10392.4	1520	10590.3	1520	12329
1525	10471.2	1525	9112.6	0.14505	10568.3	1525	11909.7	1525	10404.1	1525	10584.5	1525	12334.8
1530	10482.9	1530	9109.67	0.1447	10578.6	1530	11939	1530	10412.9	1530	10575.7	1530	12331.9
1535	10521.1	1535	9115.53	0.1443	10590.3	1535	11965.4	1535	10421.7	1535	10569.8	1535	12334.8
1540	10556.2	1540	9109.67	0.14425	10591.8	1540	11988.9	1540	10433.5	1540	10575.7	1540	12334.8
1545	10576.8	1545	9103.8	0.1444	10587.4	1545	12006.5	1545	10442.3	1545	10584.5	1545	12326.1
1550	10585.6	1550	9109.67	0.14425	10591.8	1550	12015.3	1550	10446.7	1550	10596.2	1550	12314.3
1555	10582.6	1555	9112.6	0.14445	10585.9	1555	12012.3	1555	10452.5	1555	10605	1555	12317.3
1560	10579.7	1560	9121.4	0.1446	10581.5	1560	12015.3	1560	10445.2	1560	10605	1560	12302.6
1565	10570.9	1565	9130.19	0.1447	10578.6	1565	12000.6	1565	10433.5	1565	10599.1	1565	12290.9
1570	10553.3	1570	9138.99	0.14465	10580.1	1570	11983	1570	10423.2	1570	10593.3	1570	12279.1
1575	10524	1575	9141.92	0.14455	10583	1575	11968.4	1575	10415.9	1575	10584.5	1575	12273.3
1580	10497.6	1580	9144.85	0.1443	10590.3	1580	11962.5	1580	10412.9	1580	10575.7	1580	12270.3
1585	10488.8	1585	9144.85	0.1442	10593.3	1585	11965.4	1585	10418.8	1585	10575.7	1585	12267.4
1590	10494.7	1590	9147.78	0.14415	10594.7	1590	11977.1	1590	10418.8	1590	10569.8	1590	12261.5
1595	10515.2	1595	9144.85	0.14415	10594.7	1595	11983	1595	10418.8	1595	10569.8	1595	12252.8
1600	10529.9	1600	9144.85	0.14425	10591.8	1600	11983	1600	10418.8	1600	10566.9	1600	12249.8
1605	10547.4	1605	9147.78	0.14435	10588.9	1605	11985.9	1605	10410	1605	10555.1	1605	12255.7
1610	10559.2	1610	9147.78	0.14435	10588.9	1610	11980.1	1610	10402.7	1610	10549.3	1610	12258.6
1615	10573.8	1615	9153.65	0.14425	10591.8	1615	11971.3	1615	10395.3	1615	10534.6	1615	12258.6
1620	10573.8	1620	9156.58	0.1441	10596.2	1620	11971.3	1620	10380.7	1620	10505.3	1620	12258.6
1625	10570.9	1625	9156.58	0.14405	10597.6	1625	11971.3	1625	10382.1	1625	10502.4	1625	12249.8
1630	10565	1630	9159.51	0.1439	10602	1630	11977.1	1630	10377.8	1630	10490.6	1630	12244
1635	10544.5	1635	9165.38	0.14355	10612.3	1635	11980.1	1635	10377.8	1635	10484.8	1635	12223.4
1640	10529.9	1640	9168.31	0.1434	10616.7	1640	11985.9	1640	10382.1	1640	10478.9	1640	12208.8
1645	10512.3	1645	9174.17	0.1433	10619.6	1645	12000.6	1645	10383.6	1645	10476	1645	12191.2
1650	10500.5	1650	9182.97	0.14335	10618.2	1650	12006.5	1650	10386.5	1650	10481.8	1650	12179.5
1655	10494.7	1655	9182.97	0.1435	10613.8	1655	12006.5	1655	10382.1	1655	10484.8	1655	12170.7
1660	10497.6	1660	9188.83	0.1435	10613.8	1660	11994.7	1660	10383.6	1660	10496.5	1660	12158.9
1665	10503.5	1665	9185.9	0.14355	10612.3	1665	11985.9	1665	10385.1	1665	10505.3	1665	12150.1
1670	10512.3	1670	9188.83	0.14355	10612.3	1670	11980.1	1670	10385.1	1670	10505.3	1670	12150.1
1675	10521.1	1675	9191.76	0.14365	10609.4	1675	11980.1	1675	10367.5	1675	10473	1675	12150.1
1680	10535.7	1680	9197.63	0.1437	10607.9	1680	11977.1	1680	10344	1680	10434.9	1680	12153.1
1685	10544.5	1685	9200.56	0.1437	10607.9	1685	11968.4	1685	10344	1685	10443.7	1685	12170.7
1690	10556.2	1690	9206.42	0.1437	10607.9	1690	11959.6	1690	10371.9	1690	10502.4	1690	12182.4
1695	10562.1	1695	9203.49	0.14375	10606.4	1695	11956.6	1695	10399.7	1695	10563.9	1695	12205.8
1700	10565	1700	9209.36	0.14365	10609.4	1700	11950.8	1700	10410	1700	10584.5	1700	12217.6
1705	10568	1705	9209.36	0.14365	10609.4	1705	11950.8	1705	10410	1705	10584.5	1705	12202.9
1710	10562.1	1710	9212.29	0.14365	10609.4	1710	11950.8	1710	10404.1	1710	10572.7	1710	12185.3
1715	10565	1715	9212.29	0.14355	10612.3	1715	11950.8	1715	10390.9	1715	10549.3	1715	12158.9
1720	10562.1	1720	9212.29	0.14365	10609.4	1720	11947.8	1720	10386.5	1720	10534.6	1720	12153.1
1725	10565	1725	9206.42	0.1438	10605	1725	11953.7	1725	10373.4	1725	10514.1	1725	12153.1
1730	10565	1730	9209.36	0.14395	10600.6	1730	11947.8	1730	10363.1	1730	10496.5	1730	12135.5
1735	10562.1	1735	9206.42	0.14445	10585.9	1735	11944.9	1735	10352.8	1735	10487.7	1735	12120.8
1740	10573.8	1740	9203.49	0.14485	10574.2	1740	11933.2	1740	10330.8	1740	10470.1	1740	12106.2
1745	10588.5	1745	9200.56	0.14525	10562.5	1745	11906.8	1745	10311.8	1745	10452.5	1745	12088.6
1750	10600.2	1750	9194.7	0.1455	10555.1	1750	11886.3	1750	10292.7	1750	10434.9	1750	12073.9
1755	10603.2	1755	9174.17	0.1458	10546.3	1755	11865.7	1755	10278.1	1755	10414.4	1755	12065.1
1760	10600.2	1760	9165.38	0.14585	10544.9	1760	11856.9	1760	10273.7	1760	10402.7	1760	12053.4
1765	10606.1	1765	9147.78	0.146	10540.5	1765	11859.9	1765	10272.2	1765	10393.9	1765	12044.6
1770	10606.1	1770	9130.19	0.1462	10534.6	1770	11865.7	1770	10273.7	1770	10388	1770	12032.9
1775	10603.2	1775	9109.67	0.1465	10525.8	1775	11874.5	1775	10275.1	1775	10385.1	1775	12021.1
1780	10591.4	1780	9089.14	0.1469	10514.1	1780	11880.4	1780	10279.5	1780	10390.9	1780	12000.6
1785	10582.6	1785	9065.69	0.1473	10502.4	1785	11883.3	1785	10276.6	1785	10388	1785	11997.7
1790	10576.8	1790	9051.03	0.14745	10498	1790	11880.4	1790	10281	1790	10396.8	1790	11980.1
1795	10576.8	1795	9036.37	0.1477	10490.6	1795	11880.4	1795	10285.4	1795	10399.7	1795	11971.3
1800	10573.8	1800	9018.78	0.14795	10483.3	1800	11886.3	1800	10286.9	1800	10402.7	1800	11965.4
1805	10568	1805	9007.05	0.1484	10470.1	1805	11886.3	1805	10286.9	1805	10399.7	1805	11965.4
1810	10570.9	1810	8995.32	0.14855	10465.7	1810	11889.2	1810	10272.2	1810	10385.1	1810	11959.6
1815	10570.9	1815	8989.46	0.14855	10465.7	1815	11874.5	1815	10260.5	1815	10358.7	1815	11962.5
1820	10570.9	1820	8986.53	0.1485	10467.2	1820	11877.5	1820	10251.7	1820	10335.2	1820	11953.7
1825	10568	1825	8983.59	0.1487	10461.3	1825	11883.3	1825	10241.4	1825	10308.8	1825	11953.7
1830	10562.1	1830	8986.53	0.14875	10459.8	1830	11889.2	1830	10223.8	1830	10282.5	1830	11944.9
1835	10570.9	1835	8995.32	0.1488	10458.4	1835	11880.4	1835	10213.6	1835	10267.8	1835	11942
1840	10559.2	1840	9004.12	0.149	10452.5	1840	11874.5	1840	10209.2	1840	10270.7	1840	11933.2
1845	10553.3	1845	9012.91	0.14915	10448.1	1845	11862.8	1845	10203.3	1845	10279.5	1845	11927.3
1850	10559.2	1850	9021.71	0.1491	10449.6	1850	11842.3	1850	10200.4	1850	10291.3	1850	11915.6
1855	10559.2	1855	9030.51	0.14915	10448.1	1855	11824.7	1855	10206.2	1855	10308.8	1855	11900.9
1860	10559.2	1860	9042.23	0.14915	10448.1	1860	11818.8	1860	10207.7	1860	10323.5	1860	11898
1865	10562.1	1865	9051.03	0.1491	10449.6	1865	11807.1	1865	10201.8	1865	10323.5	1865	11895.1
1870	10559.2	1870	9059.83	0.1491	10449.6	1870	11795.4	1870	10197.4	1870	10320.6	1870	11892.1
1875	10556.2	1875	9068.62	0.149	10452.5	1875	11789.5	1875	10187.2	1875	10308.8	1875	11883.3
1880	10553.3	1880	9071.55	0.149	10452.5	1880	11780.7	1880	10182.8	1880	10303	1880	11889.2
1885	10553.3	1885	9086.21	0.14885	10456.9	1885	11777.8	1885	10172.5	1885	10285.4	1885	11880.4
1890	10544.5	1890	9089.14	0.1489	10455.4	1890	11774.8	1890	10165.2	1890	10276.6	1890	11886.3
1895	10541.6	1895	9097.94	0.14875	10459.8	1895	11769	1895	10154.9	1895	10261.9	1895	11880.4
1900	10544.5	1900	9103.8	0.1486	10464.2	1900	11763.1	1900	10149.1	1900	10250.2	1900	11877.5
1905	10535.7	1905	9112.6	0.1484	10470.1	1905	11763.1	1905	10144.7	1905	10238.5	1905	11877.5
1910	10515.2	1910	9112.6	0.14845	10468.6	1910	11766	1910	10144.7	1910	10235.6	1910	11880.4
1915	10494.7	1915	9109.67	0.14855	10465.7	1915	11769	1915	10140.3	1915	10229.7	1915	11883.3
1920	10477.1	1920	9097.94	0.1489	10455.4	1920	11766	1920	10137.3	1920	10226.8	1920	11880.4
1925	10468.3	1925	9089.14	0.14915	10448.1	1925	11763.1	1925	10130	1925	10220.9	1925	11880.4
1930	10477.1	1930	9074.49	0.1495	10437.9	1930	11754.3	1930	10121.2	1930	10209.2	1930	11871.6
1935	10500.5	1935	9059.83	0.14985	10427.6	1935	11748.5	1935	10116.8	1935	10206.2	1935	11871.6
1940	10524	1940	9051.03	0.15015	10418.8	1940	11742.6	1940	10109.5	1940	10197.4	1940	11865.7
1945	10544.5	1945	9045.17	0.1504	10411.5	1945	11736.7	1945	10103.6	1945	10194.5	1945	11848.1
1950	10559.2	1950	9039.3	0.1508	10399.7	1950	11727.9	1950	10091.9	1950	10179.8	1950	11839.3
1955	10553.3	1955	9033.44	0.151	10393.9	1955	11719.1	1955	10084.6	1955	10182.8	1955	11824.7
1960	10550.4	1960	9024.64	0.151	10393.9	1960	11701.5	1960	10075.8	1960	10171	1960	11813
1965	10544.5	1965	9015.85	0.15095	10395.3	1965	11695.7	1965	10083.1	1965	10176.9	1965	11813
1970	10541.6	1970	9007.05	0.15095	10395.3	1970	11704.5	1970	10094.8	1970	10188.6	1970	11798.3
1975	10535.7	1975	8995.32	0.1511	10390.9	1975	11716.2	1975	10106.5	1975	10203.3	1975	11774.8
1980	10529.9	1980	8986.53	0.15125	10386.5	1980	11725	1980	10112.4	1980	10212.1	1980	11757.2
1985	10518.1	1985	8974.8	0.15135	10383.6	1985	11727.9	1985	10110.9	1985	10209.2	1985	11739.7
1990	10494.7	1990	8971.87	0.15115	10389.5	1990	11727.9	1990	10109.5	1990	10200.4	1990	11727.9
1995	10482.9	1995	8971.87	0.15095	10395.3	1995	11733.8	1995	10108	1995	10182.8	1995	11713.3
2000	10471.2	2000	8963.07	0.151	10393.9	2000	11748.5	2000	10105.1	2000	10165.2	2000	11713.3
2005	10474.1	2005	8960.14	0.15075	10401.2	2005	11760.2	2005	10100.7	2005	10150.5	2005	11707.4
2010	10480	2010	8963.07	0.15025	10415.9	2010	11766	2010	10103.6	2010	10138.8	2010	11710.3
2015	10485.9	2015	8963.07	0.1496	10434.9	2015	11783.6	2015	10110.9	2015	10127.1	2015	11707.4
2020	10491.7	2020	8960.14	0.1491	10449.6	2020	11810	2020	10130	2020	10127.1	2020	11704.5
2025	10485.9	2025	8957.21	0.1486	10464.2	2025	11848.1	2025	10144.7	2025	10124.1	2025	11704.5
2030	10477.1	2030	8957.21	0.1481	10478.9	2030	11880.4	2030	10157.9	2030	10118.3	2030	11695.7
2035	10468.3	2035	8951.34	0.148	10481.8	2035	11912.6	2035	10166.6	2035	10106.5	2035	11692.7
2040	10468.3	2040	8942.55	0.1482	10476	2040	11942	2040	10163.7	2040	10089	2040	11689.8
2045	10465.3	2045	8936.68	0.14845	10468.6	2045	11953.7	2045	10153.5	2045	10071.4	2045	11695.7
2050	10465.3	2050	8924.95	0.149	10452.5	2050	11950.8	2050	10144.7	2050	10062.6	2050	11689.8
2055	10462.4	2055	8913.23	0.1495	10437.9	2055	11942	2055	10132.9	2055	10059.6	2055	11689.8
2060	10465.3	2060	8910.29	0.15005	10421.7	2060	11921.4	2060	10121.2	2060	10053.8	2060	11672.2
2065	10480	2065	8907.36	0.1505	10408.5	2065	11903.8	2065	10103.6	2065	10047.9	2065	11666.4
2070	10482.9	2070	8895.63	0.1511	10390.9	2070	11874.5	2070	10089	2070	10042	2070	11654.6
2075	10485.9	2075	8895.63	0.1514	10382.1	2075	11851.1	2075	10071.4	2075	10030.3	2075	11660.5
2080	10491.7	2080	8886.84	0.1519	10367.5	2080	11827.6	2080	10058.2	2080	10021.5	2080	11660.5
2085	10500.5	2085	8875.11	0.15235	10354.3	2085	11810	2085	10040.6	2085	10006.9	2085	11666.4
2090	10518.1	2090	8866.31	0.15265	10345.5	2090	11789.5	2090	10024.4	2090	9989.26	2090	11651.7
2095	10532.8	2095	8848.72	0.15305	10333.8	2095	11774.8	2095	10018.6	2095	9986.33	2095	11642.9
2100	10529.9	2100	8836.99	0.1533	10326.4	2100	11766	2100	10012.7	2100	9980.47	2100	11622.4
2105	10532.8	2105	8825.27	0.15365	10316.2	2105	11760.2	2105	10008.3	2105	9974.6	2105	11613.6
2110	10547.4	2110	8810.61	0.1539	10308.8	2110	11757.2	2110	10005.4	2110	9977.54	2110	11593.1
2115	10550.4	2115	8804.74	0.1541	10303	2115	11748.5	2115	10003.9	2115	9974.6	2115	11584.3
2120	10559.2	2120	8795.95	0.15435	10295.7	2120	11748.5	2120	10003.9	2120	9980.47	2120	11575.5
2125	10553.3	2125	8784.22	0.1545	10291.3	2125	11742.6	2125	9999.53	2125	9977.54	2125	11578.4
2130	10556.2	2130	8775.42	0.15445	10292.7	2130	11736.7	2130	10002.5	2130	9980.47	2130	11569.6
2135	10550.4	2135	8769.56	0.15455	10289.8	2135	11739.7	2135	10006.9	2135	9977.54	2135	11566.7
2140	10556.2	2140	8757.83	0.1547	10285.4	2140	11751.4	2140	10008.3	2140	9980.47	2140	11563.7
2145	10553.3	2145	8751.97	0.15485	10281	2145	11751.4	2145	10006.9	2145	9974.6	2145	11572.5
2150	10541.6	2150	8751.97	0.155	10276.6	2150	11754.3	2150	10005.4	2150	9974.6	2150	11566.7
2155	10532.8	2155	8746.1	0.1553	10267.8	2155	11751.4	2155	9998.06	2155	9968.74	2155	11569.6
2160	10535.7	2160	8749.04	0.15555	10260.5	2160	11742.6	2160	9987.8	2160	9959.94	2160	11575.5
2165	10538.7	2165	8751.97	0.15585	10251.7	2165	11730.9	2165	9968.74	2165	9939.42	2165	11581.3
2170	10529.9	2170	8749.04	0.15615	10242.9	2170	11713.3	2170	9952.61	2170	9927.69	2170	11581.3
2175	10526.9	2175	8749.04	0.1564	10235.6	2175	11692.7	2175	9942.35	2175	9921.83	2175	11578.4
2180	10524	2180	8749.04	0.1567	10226.8	2180	11678.1	2180	9929.16	2180	9910.1	2180	11572.5
2185	10526.9	2185	8746.1	0.15705	10216.5	2185	11663.4	2185	9915.96	2185	9901.3	2185	11563.7
2190	10535.7	2190	8743.17	0.15715	10213.6	2190	11645.8	2190	9901.3	2190	9889.58	2190	11563.7
2195	10532.8	2195	8743.17	0.1571	10215	2195	11628.2	2195	9892.51	2195	9874.92	2195	11546.1
2200	10526.9	2200	8740.24	0.15695	10219.4	2200	11625.3	2200	9886.64	2200	9860.26	2200	11531.5
2205	10518.1	2205	8734.38	0.157	10218	2205	11628.2	2205	9892.51	2205	9860.26	2205	11519.8
2210	10503.5	2210	8722.65	0.15695	10219.4	2210	11640	2210	9896.91	2210	9866.12	2210	11508
2215	10506.4	2215	8716.78	0.1571	10215	2215	11642.9	2215	9910.1	2215	9877.85	2215	11496.3
2220	10512.3	2220	8710.92	0.1571	10215	2220	11657.6	2220	9914.5	2220	9889.58	2220	11490.4
2225	10515.2	2225	8702.12	0.15725	10210.6	2225	11654.6	2225	9924.76	2225	9904.24	2225	11475.8
2230	10521.1	2230	8690.4	0.1577	10197.4	2230	11660.5	2230	9923.29	2230	9901.3	2230	11467
2235	10515.2	2235	8693.33	0.1579	10191.6	2235	11660.5	2235	9915.96	2235	9901.3	2235	11455.3
2240	10515.2	2240	8684.53	0.1584	10176.9	2240	11645.8	2240	9910.1	2240	9904.24	2240	11446.5
2245	10506.4	2245	8672.8	0.159	10159.3	2245	11631.2	2245	9899.84	2245	9904.24	2245	11434.7
2250	10506.4	2250	8664.01	0.15925	10152	2250	11610.6	2250	9889.58	2250	9907.17	2250	11437.7
2255	10515.2	2255	8652.28	0.15955	10143.2	2255	11587.2	2255	9888.11	2255	9910.1	2255	11446.5
2260	10518.1	2260	8640.55	0.15985	10134.4	2260	11581.3	2260	9886.64	2260	9913.03	2260	11446.5
2265	10497.6	2265	8634.69	0.16	10130	2265	11575.5	2265	9880.78	2265	9907.17	2265	11452.3
2270	10480	2270	8622.96	0.16045	10116.8	2270	11569.6	2270	9880.78	2270	9910.1	2270	11440.6
2275	10456.5	2275	8611.23	0.1609	10103.6	2275	11566.7	2275	9877.85	2275	9918.9	2275	11417.1
2280	10444.8	2280	8593.64	0.1613	10091.9	2280	11552	2280	9871.98	2280	9921.83	2280	11399.5
2285	10433.1	2285	8584.84	0.1614	10089	2285	11537.4	2285	9871.98	2285	9927.69	2285	11396.6
2290	10447.8	2290	8578.98	0.1612	10094.8	2290	11531.5	2290	9873.45	2290	9927.69	2290	11399.5
2295	10468.3	2295	8581.91	0.1611	10097.7	2295	11534.4	2295	9883.71	2295	9930.62	2295	11390.8
2300	10485.9	2300	8581.91	0.1608	10106.5	2300	11552	2300	9883.71	2300	9927.69	2300	11379
2305	10491.7	2305	8584.84	0.16085	10105.1	2305	11554.9	2305	9896.91	2305	9936.49	2305	11376.1
2310	10488.8	2310	8587.78	0.16085	10105.1	2310	11572.5	2310	9889.58	2310	9927.69	2310	11376.1
2315	10485.9	2315	8584.84	0.16105	10099.2	2315	11566.7	2315	9889.58	2315	9930.62	2315	11361.4
2320	10474.1	2320	8581.91	0.16125	10093.3	2320	11563.7	2320	9882.25	2320	9924.76	2320	11355.6
2325	10468.3	2325	8578.98	0.1616	10083.1	2325	11554.9	2325	9874.92	2325	9918.9	2325	11338
2330	10459.5	2330	8578.98	0.16155	10084.6	2330	11546.1	2330	9860.26	2330	9907.17	2330	11332.1
2335	10453.6	2335	8576.05	0.1615	10086	2335	11528.6	2335	9860.26	2335	9904.24	2335	11320.4
2340	10447.8	2340	8570.18	0.16165	10081.6	2340	11531.5	2340	9860.26	2340	9898.37	2340	11317.5
2345	10456.5	2345	8564.32	0.16195	10072.8	2345	11537.4	2345	9854.39	2345	9889.58	2345	11308.7
2350	10480	2350	8561.39	0.1623	10062.6	2350	11534.4	2350	9847.06	2350	9886.64	2350	11305.7
2355	10500.5	2355	8558.46	0.1626	10053.8	2355	11522.7	2355	9836.8	2355	9883.71	2355	11294
2360	10529.9	2360	8552.59	0.16275	10049.4	2360	11505.1	2360	9826.54	2360	9877.85	2360	11288.1
2365	10544.5	2365	8540.86	0.16305	10040.6	2365	11490.4	2365	9825.07	2365	9877.85	2365	11285.2
2370	10541.6	2370	8535	0.1631	10039.1	2370	11487.5	2370	9823.61	2370	9880.78	2370	11279.3
2375	10544.5	2375	8526.2	0.1635	10027.4	2375	11481.6	2375	9822.14	2375	9874.92	2375	11264.7
2380	10526.9	2380	8517.41	0.164	10012.7	2380	11484.6	2380	9811.88	2380	9869.05	2380	11261.7
2385	10515.2	2385	8508.61	0.16455	9996.59	2385	11469.9	2385	9803.08	2385	9871.98	2385	11267.6
2390	10500.5	2390	8499.82	0.16505	9981.93	2390	11449.4	2390	9786.96	2390	9863.19	2390	11267.6
2395	10491.7	2395	8491.02	0.16555	9967.27	2395	11425.9	2395	9772.3	2395	9854.39	2395	11264.7
2400	10477.1	2400	8491.02	0.1659	9957.01	2400	11405.4	2400	9760.57	2400	9851.46	2400	11267.6
2405	10471.2	2405	8479.29	0.16645	9940.89	2405	11384.9	2405	9745.91	2405	9842.66	2405	11258.8
2410	10462.4	2410	8464.63	0.16695	9926.23	2410	11364.4	2410	9732.72	2410	9836.8	2410	11250
2415	10441.9	2415	8447.04	0.16735	9914.5	2415	11343.8	2415	9722.45	2415	9830.94	2415	11247.1
2420	10447.8	2420	8432.38	0.16765	9905.7	2420	11329.2	2420	9715.12	2420	9822.14	2420	11247.1
2425	10450.7	2425	8420.65	0.16795	9896.91	2425	11323.3	2425	9713.66	2425	9822.14	2425	11244.2
2430	10450.7	2430	8405.99	0.1682	9889.58	2430	11320.4	2430	9706.33	2430	9813.34	2430	11244.2
2435	10447.8	2435	8394.27	0.16835	9885.18	2435	11314.5	2435	9704.86	2435	9810.41	2435	11247.1
2440	10436	2440	8385.47	0.16825	9888.11	2440	11314.5	2440	9704.86	2440	9807.48	2440	11252.9
2445	10427.2	2445	8382.54	0.168	9895.44	2445	11317.5	2445	9710.73	2445	9804.55	2445	11244.2
2450	10421.4	2450	8382.54	0.16765	9905.7	2450	11332.1	2450	9716.59	2450	9798.68	2450	11238.3
2455	10421.4	2455	8382.54	0.1673	9915.96	2455	11349.7	2455	9725.39	2455	9795.75	2455	11229.5
2460	10409.6	2460	8385.47	0.16695	9926.23	2460	11370.2	2460	9735.65	2460	9795.75	2460	11220.7
2465	10403.8	2465	8388.4	0.16655	9937.95	2465	11390.8	2465	9742.98	2465	9792.82	2465	11206
2470	10400.8	2470	8382.54	0.1665	9939.42	2470	11408.3	2470	9754.7	2470	9795.75	2470	11203.1
2475	10400.8	2475	8391.33	0.1661	9951.15	2475	11428.9	2475	9756.17	2475	9789.89	2475	11209
2480	10406.7	2480	8391.33	0.1659	9957.01	2480	11437.7	2480	9759.1	2480	9781.09	2480	11211.9
2485	10409.6	2485	8394.27	0.16545	9970.21	2485	11452.3	2485	9760.57	2485	9772.3	2485	11206
2490	10403.8	2490	8394.27	0.1651	9980.47	2490	11464.1	2490	9769.36	2490	9766.43	2490	11203.1
2495	10392	2495	8394.27	0.1651	9980.47	2495	11487.5	2495	9773.76	2495	9754.7	2495	11197.2
2500	10377.4	2500	8388.4	0.16525	9976.07	2500	11508	2500	9772.3	2500	9751.77	2500	11203.1
2505	10362.7	2505	8388.4	0.16545	9970.21	2505	11508	2505	9767.9	2505	9745.91	2505	11203.1
2510	10351	2510	8391.33	0.1658	9959.94	2510	11505.1	2510	9763.5	2510	9748.84	2510	11200.2
2515	10362.7	2515	8394.27	0.16595	9955.55	2515	11493.4	2515	9747.37	2515	9740.05	2515	11194.3
2520	10386.2	2520	8400.13	0.16615	9949.68	2520	11469.9	2520	9740.05	2520	9737.11	2520	11185.5
2525	10415.5	2525	8405.99	0.16645	9940.89	2525	11458.2	2525	9729.78	2525	9734.18	2525	11182.6
2530	10436	2530	8408.93	0.1666	9936.49	2530	11440.6	2530	9716.59	2530	9731.25	2530	11185.5
2535	10436	2535	8414.79	0.16685	9929.16	2535	11417.1	2535	9709.26	2535	9728.32	2535	11191.4
2540	10403.8	2540	8411.86	0.16725	9917.43	2540	11405.4	2540	9696.07	2540	9722.45	2540	11185.5
2545	10371.5	2545	8408.93	0.16755	9908.63	2545	11384.9	2545	9684.34	2545	9719.52	2545	11194.3
2550	10351	2550	8400.13	0.16775	9902.77	2550	11364.4	2550	9669.68	2550	9704.86	2550	11197.2
2555	10330.5	2555	8391.33	0.168	9895.44	2555	11349.7	2555	9668.21	2555	9704.86	2555	11185.5
2560	10315.8	2560	8376.67	0.1683	9886.64	2560	11346.8	2560	9662.35	2560	9699	2560	11182.6
2565	10327.5	2565	8364.95	0.1686	9877.85	2565	11340.9	2565	9652.09	2565	9681.41	2565	11170.9
2570	10359.8	2570	8347.35	0.169	9866.12	2570	11338	2570	9649.15	2570	9681.41	2570	11165
2575	10389.1	2575	8332.69	0.16945	9852.93	2575	11332.1	2575	9641.82	2575	9672.61	2575	11159.1
2580	10412.6	2580	8312.17	0.1699	9839.73	2580	11326.2	2580	9635.96	2580	9672.61	2580	11141.5
2585	10418.4	2585	8294.58	0.17035	9826.54	2585	11314.5	2585	9628.63	2585	9663.81	2585	11135.7
2590	10427.2	2590	8276.99	0.1708	9813.34	2590	11308.7	2590	9624.23	2590	9663.81	2590	11118.1
2595	10430.2	2595	8253.53	0.17145	9794.29	2595	11299.9	2595	9615.44	2595	9655.02	2595	11109.3
2600	10412.6	2600	8233.01	0.17205	9776.69	2600	11291.1	2600	9600.78	2600	9640.36	2600	11100.5
2605	10389.1	2605	8218.35	0.17245	9764.97	2605	11276.4	2605	9591.98	2605	9637.43	2605	11106.3
2610	10377.4	2610	8212.48	0.17295	9750.31	2610	11261.7	2610	9583.18	2610	9628.63	2610	11112.2
2615	10348.1	2615	8203.69	0.17355	9732.72	2615	11252.9	2615	9569.99	2615	9625.7	2615	11118.1
2620	10324.6	2620	8194.89	0.1739	9722.45	2620	11229.5	2620	9556.8	2620	9625.7	2620	11109.3
2625	10309.9	2625	8215.41	0.1736	9731.25	2625	11203.1	2625	9550.93	2625	9625.7	2625	11097.6
2630	10304.1	2630	8224.21	0.1734	9737.11	2630	11191.4	2630	9546.53	2630	9619.83	2630	11088.8
2635	10304.1	2635	8200.75	0.17375	9726.85	2635	11188.4	2635	9549.47	2635	9622.77	2635	11091.7
2640	10307	2640	8189.03	0.17415	9715.12	2640	11191.4	2640	9546.53	2640	9613.97	2640	11085.8
2645	10304.1	2645	8177.3	0.17455	9703.4	2645	11194.3	2645	9537.74	2645	9608.11	2645	11082.9
2650	10301.1	2650	8174.37	0.17475	9697.53	2650	11182.6	2650	9534.81	2650	9613.97	2650	11080
2655	10301.1	2655	8177.3	0.1753	9681.41	2655	11170.9	2655	9531.87	2655	9616.9	2655	11074.1
2660	10298.2	2660	8183.16	0.17555	9674.08	2660	11162.1	2660	9518.68	2660	9625.7	2660	11077
2665	10295.3	2665	8189.03	0.1758	9666.75	2665	11126.9	2665	9509.88	2665	9628.63	2665	11074.1
2670	10289.4	2670	8191.96	0.17605	9659.42	2670	11106.3	2670	9501.09	2670	9631.56	2670	11071.2
2675	10283.5	2675	8194.89	0.176	9660.88	2675	11085.8	2675	9490.83	2675	9628.63	2675	11068.2
2680	10268.9	2680	8203.69	0.17585	9665.28	2680	11068.2	2680	9492.29	2680	9631.56	2680	11062.4
2685	10254.2	2685	8227.14	0.1754	9678.47	2685	11068.2	2685	9487.89	2685	9622.77	2685	11062.4
2690	10242.5	2690	8230.07	0.1751	9687.27	2690	11068.2	2690	9482.03	2690	9608.11	2690	11062.4
2695	10227.8	2695	8203.69	0.1753	9681.41	2695	11071.2	2695	9483.5	2695	9596.38	2695	11062.4
2700	10207.3	2700	8183.16	0.17525	9682.87	2700	11085.8	2700	9483.5	2700	9581.72	2700	11062.4
2705	10183.8	2705	8174.37	0.1753	9681.41	2705	11100.5	2705	9495.22	2705	9581.72	2705	11059.4
2710	10157.5	2710	8174.37	0.1752	9684.34	2710	11123.9	2710	9498.16	2710	9581.72	2710	11065.3
2715	10151.6	2715	8171.43	0.1753	9681.41	2715	11129.8	2715	9499.62	2715	9578.79	2715	11053.6
2720	10145.7	2720	8168.5	0.1755	9675.54	2720	11135.7	2720	9495.22	2720	9572.92	2720	11050.6
2725	10139.9	2725	8174.37	0.17565	9671.14	2725	11132.7	2725	9486.43	2725	9564.13	2725	11044.8
2730	10148.7	2730	8174.37	0.17585	9665.28	2730	11123.9	2730	9476.17	2730	9558.26	2730	11036
2735	10163.3	2735	8177.3	0.17595	9662.35	2735	11109.3	2735	9470.3	2735	9558.26	2735	11027.2
2740	10183.8	2740	8171.43	0.1761	9657.95	2740	11097.6	2740	9458.57	2740	9543.6	2740	11024.3
2745	10213.2	2745	8168.5	0.17615	9656.48	2745	11088.8	2745	9455.64	2745	9540.67	2745	11027.2
2750	10239.6	2750	8156.77	0.17625	9653.55	2750	11085.8	2750	9452.71	2750	9534.81	2750	11021.3
2755	10245.4	2755	8145.05	0.1765	9646.22	2755	11085.8	2755	9451.24	2755	9526.01	2755	11033
2760	10254.2	2760	8130.39	0.1769	9634.49	2760	11091.7	2760	9448.31	2760	9523.08	2760	11027.2
2765	10254.2	2765	8115.73	0.1774	9619.83	2765	11088.8	2765	9440.98	2765	9517.21	2765	11024.3
2770	10263	2770	8106.93	0.1777	9611.04	2770	11080	2770	9432.19	2770	9514.28	2770	11018.4
2775	10268.9	2775	8083.48	0.17825	9594.91	2775	11065.3	2775	9424.86	2775	9508.42	2775	11012.5
2780	10265.9	2780	8062.95	0.17885	9577.32	2780	11056.5	2780	9418.99	2780	9505.49	2780	11006.7
2785	10268.9	2785	8051.22	0.17915	9568.52	2785	11047.7	2785	9405.8	2785	9493.76	2785	11009.6
2790	10268.9	2790	8036.56	0.1797	9552.4	2790	11033	2790	9395.54	2790	9479.1	2790	11006.7
2795	10277.7	2795	8024.84	0.17995	9545.07	2795	11027.2	2795	9377.95	2795	9461.51	2795	11006.7
2800	10274.7	2800	8013.11	0.18045	9530.41	2800	11009.6	2800	9366.22	2800	9440.98	2800	10997.9
2805	10263	2805	8007.24	0.18075	9521.61	2805	11006.7	2805	9353.02	2805	9432.19	2805	10992
2810	10260.1	2810	8004.31	0.18095	9515.75	2810	10989.1	2810	9342.76	2810	9423.39	2810	10986.1
2815	10257.2	2815	7995.52	0.18135	9504.02	2815	10977.3	2815	9331.03	2815	9408.73	2815	10971.5
2820	10251.3	2820	7986.72	0.1818	9490.83	2820	10968.5	2820	9317.84	2820	9397	2820	10974.4
2825	10257.2	2825	7980.86	0.18205	9483.5	2825	10953.9	2825	9306.11	2825	9391.14	2825	10977.3
2830	10251.3	2830	7980.86	0.18205	9483.5	2830	10936.3	2830	9300.25	2830	9388.21	2830	10983.2
2835	10248.4	2835	7966.2	0.1824	9473.23	2835	10927.5	2835	9300.25	2835	9388.21	2835	10980.3
2840	10239.6	2840	7957.4	0.1826	9467.37	2840	10927.5	2840	9295.85	2840	9385.28	2840	10977.3
2845	10230.8	2845	7954.47	0.1826	9467.37	2845	10921.6	2845	9295.85	2845	9388.21	2845	10980.3
2850	10227.8	2850	7954.47	0.18255	9468.84	2850	10918.7	2850	9300.25	2850	9394.07	2850	10977.3
2855	10210.2	2855	7945.67	0.1826	9467.37	2855	10921.6	2855	9303.18	2855	9397	2855	10980.3
2860	10195.6	2860	7948.6	0.1825	9470.3	2860	10924.6	2860	9309.04	2860	9402.87	2860	10992
2865	10180.9	2865	7948.6	0.1825	9470.3	2865	10930.4	2865	9314.91	2865	9411.66	2865	10983.2
2870	10166.3	2870	7945.67	0.1825	9470.3	2870	10933.4	2870	9310.51	2870	9402.87	2870	10980.3
2875	10142.8	2875	7933.94	0.1827	9464.44	2875	10933.4	2875	9304.65	2875	9388.21	2875	10986.1
2880	10128.1	2880	7922.22	0.1829	9458.57	2880	10936.3	2880	9298.78	2880	9376.48	2880	10986.1
2885	10119.3	2885	7913.42	0.1832	9449.78	2885	10936.3	2885	9297.32	2885	9373.55	2885	10994.9
2890	10107.6	2890	7913.42	0.18315	9451.24	2890	10936.3	2890	9291.45	2890	9370.62	2890	10989.1
2895	10107.6	2895	7901.69	0.1834	9443.91	2895	10927.5	2895	9295.85	2895	9376.48	2895	10980.3
2900	10113.5	2900	7889.96	0.1835	9440.98	2900	10930.4	2900	9295.85	2900	9379.41	2900	10977.3
2905	10107.6	2905	7884.1	0.1834	9443.91	2905	10927.5	2905	9295.85	2905	9373.55	2905	10962.7
2910	10090	2910	7881.17	0.1834	9443.91	2910	10933.4	2910	9291.45	2910	9353.02	2910	10959.7
2915	10066.6	2915	7866.51	0.18345	9442.45	2915	10945.1	2915	9291.45	2915	9350.09	2915	10962.7
2920	10046	2920	7866.51	0.1834	9443.91	2920	10948	2920	9285.59	2920	9326.64	2920	10959.7
2925	10025.5	2925	7857.71	0.1836	9438.05	2925	10959.7	2925	9282.66	2925	9317.84	2925	10965.6
2930	10028.4	2930	7845.98	0.1838	9432.19	2930	10962.7	2930	9276.79	2930	9309.04	2930	10974.4
2935	10046	2935	7843.05	0.184	9426.32	2935	10959.7	2935	9270.93	2935	9297.32	2935	10965.6
2940	10072.4	2940	7831.32	0.18425	9418.99	2940	10959.7	2940	9262.13	2940	9288.52	2940	10977.3
2945	10098.8	2945	7822.53	0.1845	9411.66	2945	10951	2945	9256.27	2945	9279.72	2945	10965.6
2950	10128.1	2950	7813.73	0.1846	9408.73	2950	10948	2950	9254.8	2950	9282.66	2950	10953.9
2955	10151.6	2955	7804.94	0.18465	9407.27	2955	10942.2	2955	9253.34	2955	9276.79	2955	10945.1
2960	10169.2	2960	7802	0.1847	9405.8	2960	10945.1	2960	9254.8	2960	9273.86	2960	10939.2
2965	10189.7	2965	7793.21	0.185	9397	2965	10951	2965	9247.47	2965	9259.2	2965	10930.4
2970	10207.3	2970	7787.34	0.1852	9391.14	2970	10951	2970	9237.21	2970	9247.47	2970	10912.8
2975	10222	2975	7784.41	0.1854	9385.28	2975	10942.2	2975	9229.88	2975	9238.68	2975	10912.8
2980	10224.9	2980	7781.48	0.18555	9380.88	2980	10936.3	2980	9225.48	2980	9238.68	2980	10921.6
2985	10224.9	2985	7784.41	0.18565	9377.95	2985	10927.5	2985	9216.69	2985	9226.95	2985	10924.6
2990	10216.1	2990	7799.07	0.18555	9380.88	2990	10921.6	2990	9213.75	2990	9229.88	2990	10921.6
2995	10210.2	2995	7816.66	0.1855	9382.34	2995	10912.8	2995	9209.36	2995	9229.88	2995	10912.8
3000	10216.1	3000	7802	0.18605	9366.22	3000	10904	3000	9204.96	3000	9235.74	3000	10918.7
3005	10210.2	3005	7781.48	0.1866	9350.09	3005	10889.4	3005	9199.09	3005	9241.61	3005	10909.9
3010	10210.2	3010	7781.48	0.18685	9342.76	3010	10871.8	3010	9196.16	3010	9247.47	3010	10918.7
3015	10219	3015	7784.41	0.1869	9341.3	3015	10860.1	3015	9190.3	3015	9250.4	3015	10912.8
3020	10219	3020	7790.28	0.18695	9339.83	3020	10845.4	3020	9187.37	3020	9250.4	3020	10907
3025	10219	3025	7784.41	0.1872	9332.5	3025	10839.5	3025	9185.9	3025	9256.27	3025	10901.1
3030	10219	3030	7790.28	0.1872	9332.5	3030	10830.7	3030	9181.5	3030	9256.27	3030	10904
3035	10216.1	3035	7793.21	0.18735	9328.1	3035	10821.9	3035	9174.17	3035	9247.47	3035	10895.2
3040	10204.4	3040	7784.41	0.1877	9317.84	3040	10816.1	3040	9166.84	3040	9244.54	3040	10889.4
3045	10195.6	3045	7781.48	0.188	9309.04	3045	10804.4	3045	9155.11	3045	9232.81	3045	10898.2
3050	10192.6	3050	7775.62	0.18845	9295.85	3050	10792.6	3050	9149.25	3050	9235.74	3050	10895.2
3055	10183.8	3055	7766.82	0.18895	9281.19	3055	10778	3055	9134.59	3055	9226.95	3055	10898.2
3060	10180.9	3060	7760.96	0.1893	9270.93	3060	10757.4	3060	9122.86	3060	9224.02	3060	10895.2
3065	10178	3065	7749.23	0.1896	9262.13	3065	10736.9	3065	9115.53	3065	9224.02	3065	10892.3
3070	10180.9	3070	7743.37	0.19005	9248.94	3070	10722.3	3070	9109.67	3070	9218.15	3070	10886.5
3075	10189.7	3075	7737.5	0.1903	9241.61	3075	10716.4	3075	9096.47	3075	9212.29	3075	10889.4
3080	10195.6	3080	7731.64	0.19055	9234.28	3080	10695.9	3080	9093.54	3080	9215.22	3080	10895.2
3085	10192.6	3085	7716.98	0.1908	9226.95	3085	10687.1	3085	9086.21	3085	9209.36	3085	10892.3
3090	10183.8	3090	7702.32	0.1912	9215.22	3090	10678.3	3090	9084.75	3090	9206.42	3090	10892.3
3095	10180.9	3095	7687.66	0.1915	9206.42	3095	10678.3	3095	9077.42	3095	9200.56	3095	10889.4
3100	10172.1	3100	7675.93	0.1916	9203.49	3100	10669.5	3100	9074.49	3100	9197.63	3100	10880.6
3105	10160.4	3105	7673	0.1916	9203.49	3105	10666.6	3105	9073.02	3105	9188.83	3105	10865.9
3110	10151.6	3110	7664.2	0.19175	9199.09	3110	10672.4	3110	9071.55	3110	9182.97	3110	10854.2
3115	10142.8	3115	7649.54	0.1921	9188.83	3115	10675.3	3115	9070.09	3115	9180.04	3115	10851.3
3120	10136.9	3120	7649.54	0.1923	9182.97	3120	10675.3	3120	9062.76	3120	9171.24	3120	10851.3
3125	10142.8	3125	7655.41	0.19225	9184.43	3125	10669.5	3125	9055.43	3125	9168.31	3125	10857.1
3130	10142.8	3130	7658.34	0.1922	9185.9	3130	10657.8	3130	9053.96	3130	9168.31	3130	10845.4
3135	10139.9	3135	7646.61	0.1926	9174.17	3135	10654.8	3135	9049.56	3135	9159.51	3135	10863
3140	10142.8	3140	7646.61	0.19255	9175.64	3140	10654.8	3140	9043.7	3140	9159.51	3140	10854.2
3145	10154.5	3145	7646.61	0.1927	9171.24	3145	10643.1	3145	9045.17	3145	9159.51	3145	10854.2
3150	10163.3	3150	7643.68	0.19265	9172.71	3150	10646	3150	9039.3	3150	9156.58	3150	10851.3
3155	10160.4	3155	7637.81	0.19285	9166.84	3155	10637.2	3155	9040.77	3155	9153.65	3155	10848.3
3160	10151.6	3160	7629.02	0.19305	9160.98	3160	10643.1	3160	9036.37	3160	9150.72	3160	10839.5
3165	10139.9	3165	7623.15	0.1932	9156.58	3165	10637.2	3165	9030.51	3165	9141.92	3165	10833.7
3170	10128.1	3170	7617.29	0.1934	9150.72	3170	10634.3	3170	9027.57	3170	9138.99	3170	10833.7
3175	10110.5	3175	7614.36	0.19355	9146.32	3175	10631.4	3175	9021.71	3175	9133.12	3175	10821.9
3180	10084.1	3180	7617.29	0.1935	9147.78	3180	10625.5	3180	9017.31	3180	9130.19	3180	10813.2
3185	10057.8	3185	7614.36	0.1936	9144.85	3185	10619.6	3185	9017.31	3185	9130.19	3185	10798.5
3190	10019.6	3190	7623.15	0.19335	9152.18	3190	10619.6	3190	9015.85	3190	9130.19	3190	10783.8
3195	9958.06	3195	7623.15	0.19335	9152.18	3195	10616.7	3195	9017.31	3195	9127.26	3195	10772.1
3200	9878.89	3200	7629.02	0.1934	9150.72	3200	10622.6	3200	9014.38	3200	9121.4	3200	10772.1
3205	9790.92	3205	7631.95	0.19355	9146.32	3205	10622.6	3205	9011.45	3205	9124.33	3205	10778
3210	9714.68	3210	7631.95	0.19385	9137.52	3210	10613.8	3210	9004.12	3210	9121.4	3210	10801.4
3215	9638.44	3215	7631.95	0.1941	9130.19	3215	10602	3215	8992.39	3215	9115.53	3215	10804.4
3220	9573.93	3220	7634.88	0.1944	9121.4	3220	10584.5	3220	8983.59	3220	9112.6	3220	10810.2
3225	9509.42	3225	7637.81	0.19465	9114.07	3225	10569.8	3225	8970.4	3225	9106.74	3225	10816.1
3230	9453.7	3230	7640.75	0.19495	9105.27	3230	10549.3	3230	8963.07	3230	9109.67	3230	10824.9
3235	9406.79	3235	7643.68	0.1952	9097.94	3235	10531.7	3235	8954.27	3235	9112.6	3235	10824.9
3240	9348.14	3240	7634.88	0.1957	9083.28	3240	10511.2	3240	8944.01	3240	9109.67	3240	10819
3245	9286.56	3245	7626.09	0.1962	9068.62	3245	10493.6	3245	8932.28	3245	9106.74	3245	10827.8
3250	9233.78	3250	7620.22	0.1968	9051.03	3250	10473	3250	8923.49	3250	9109.67	3250	10836.6
3255	9175.14	3255	7614.36	0.19725	9037.84	3255	10452.5	3255	8905.9	3255	9103.8	3255	10833.7
3260	9122.36	3260	7602.63	0.19755	9029.04	3260	10423.2	3260	8892.7	3260	9097.94	3260	10839.5
3265	9069.57	3265	7587.97	0.1981	9012.91	3265	10402.7	3265	8886.84	3265	9092.08	3265	10830.7
3270	9031.45	3270	7573.31	0.1987	8995.32	3270	10396.8	3270	8873.64	3270	9083.28	3270	10824.9
3275	8984.54	3275	7567.45	0.1992	8980.66	3275	10379.2	3275	8864.85	3275	9086.21	3275	10821.9
3280	8952.28	3280	7567.45	0.1994	8974.8	3280	10358.7	3280	8854.59	3280	9089.14	3280	10813.2
3285	8917.1	3285	7564.51	0.1996	8968.93	3285	10335.2	3285	8853.12	3285	9097.94	3285	10798.5
3290	8890.7	3290	7555.72	0.19985	8961.6	3290	10323.5	3290	8844.32	3290	9089.14	3290	10789.7
3295	8864.31	3295	7552.79	0.19985	8961.6	3295	10314.7	3295	8834.06	3295	9074.49	3295	10798.5
3300	8843.79	3300	7541.06	0.1999	8960.14	3300	10308.8	3300	8836.99	3300	9077.42	3300	10801.4
3305	8832.06	3305	7526.4	0.1998	8963.07	3305	10311.8	3305	8836.99	3305	9068.62	3305	10795.6
3310	8829.13	3310	7514.67	0.19965	8967.47	3310	10320.6	3310	8842.86	3310	9059.83	3310	10810.2
3315	8840.86	3315	7502.94	0.1993	8977.73	3315	10341.1	3315	8851.65	3315	9056.89	3315	10801.4
3320	8852.59	3320	7497.08	0.19915	8982.13	3320	10361.6	3320	8869.25	3320	9059.83	3320	10813.2
3325	8873.11	3325	7485.35	0.1991	8983.59	3325	10393.9	3325	8879.51	3325	9065.69	3325	10807.3
3330	8902.43	3330	7479.49	0.19915	8982.13	3330	10408.5	3330	8883.91	3330	9059.83	3330	10810.2
3335	8928.82	3335	7476.55	0.1992	8980.66	3335	10423.2	3335	8885.37	3335	9059.83	3335	10801.4
3340	8949.35	3340	7494.15	0.1988	8992.39	3340	10426.1	3340	8885.37	3340	9059.83	3340	10810.2
3345	8969.88	3345	7529.33	0.19825	9008.52	3345	10426.1	3345	8888.3	3345	9059.83	3345	10810.2
3350	8984.54	3350	7564.51	0.1976	9027.57	3350	10432	3350	8882.44	3350	9051.03	3350	10804.4
3355	8990.4	3355	7538.13	0.19815	9011.45	3355	10429.1	3355	8879.51	3355	9042.23	3355	10807.3
3360	9002.13	3360	7485.35	0.1992	8980.66	3360	10432	3360	8869.25	3360	9027.57	3360	10795.6
3365	9005.06	3365	7432.58	0.20035	8946.94	3365	10426.1	3365	8863.38	3365	9024.64	3365	10786.8
3370	9028.52	3370	7412.05	0.20105	8926.42	3370	10417.3	3370	8856.05	3370	9024.64	3370	10780.9
3375	9054.91	3375	7406.19	0.2016	8910.29	3375	10402.7	3375	8841.39	3375	9015.85	3375	10780.9
3380	9087.17	3380	7394.46	0.2023	8889.77	3380	10382.1	3380	8828.2	3380	9015.85	3380	10780.9
3385	9128.22	3385	7385.66	0.2029	8872.18	3385	10355.8	3385	8809.14	3385	9007.05	3385	10778
3390	9169.27	3390	7382.73	0.20345	8856.05	3390	10326.4	3390	8795.95	3390	9007.05	3390	10780.9
3395	9204.46	3395	7379.8	0.20385	8844.32	3395	10300.1	3395	8778.35	3395	9001.19	3395	10783.8
3400	9251.38	3400	7382.73	0.20425	8832.6	3400	10270.7	3400	8765.16	3400	8995.32	3400	10786.8
3405	9295.36	3405	7371	0.20465	8820.87	3405	10250.2	3405	8750.5	3405	8992.39	3405	10786.8
3410	9359.87	3410	7368.07	0.20485	8815	3410	10223.8	3410	8741.71	3410	8986.53	3410	10780.9
3415	9424.38	3415	7365.14	0.20505	8809.14	3415	10212.1	3415	8737.31	3415	8986.53	3415	10775
3420	9488.89	3420	7362.21	0.20515	8806.21	3420	10203.3	3420	8725.58	3420	8971.87	3420	10775
3425	9547.54	3425	7350.48	0.2053	8801.81	3425	10194.5	3425	8722.65	3425	8968.93	3425	10760.4
3430	9617.91	3430	7344.62	0.20545	8797.41	3430	10191.6	3430	8722.65	3430	8966	3430	10745.7
3435	9685.36	3435	7335.82	0.2056	8793.01	3435	10194.5	3435	8719.72	3435	8963.07	3435	10731.1
3440	9741.07	3440	7341.68	0.2054	8798.88	3440	10191.6	3440	8719.72	3440	8963.07	3440	10745.7
3445	9799.72	3445	7338.75	0.2055	8795.95	3445	10191.6	3445	8724.11	3445	8966	3445	10742.8
3450	9843.7	3450	7335.82	0.2058	8787.15	3450	10197.4	3450	8724.11	3450	8968.93	3450	10748.6
3455	9873.02	3455	7332.89	0.2061	8778.35	3455	10194.5	3455	8716.78	3455	8968.93	3455	10742.8
3460	9887.68	3460	7327.02	0.2063	8772.49	3460	10179.8	3460	8707.99	3460	8966	3460	10736.9
3465	9896.48	3465	7327.02	0.2064	8769.56	3465	10165.2	3465	8703.59	3465	8963.07	3465	10742.8
3470	9914.07	3470	7327.02	0.20645	8768.09	3470	10159.3	3470	8699.19	3470	8960.14	3470	10745.7
3475	9943.4	3475	7327.02	0.20645	8768.09	3475	10153.5	3475	8697.73	3475	8960.14	3475	10734
3480	9969.79	3480	7318.23	0.2066	8763.69	3480	10150.5	3480	8696.26	3480	8957.21	3480	10742.8
3485	9984.45	3485	7315.3	0.20665	8762.23	3485	10150.5	3485	8696.26	3485	8957.21	3485	10739.9
3490	9999.11	3490	7318.23	0.20665	8762.23	3490	10150.5	3490	8693.33	3490	8951.34	3490	10751.6
3495	10002	3495	7315.3	0.20665	8762.23	3495	10150.5	3495	8688.93	3495	8945.48	3495	10751.6
3500	9999.11	3500	7312.36	0.20675	8759.3	3500	10147.6	3500	8684.53	3500	8933.75	3500	10754.5
3505	9993.25	3505	7306.5	0.20685	8756.36	3505	10150.5	3505	8678.67	3505	8924.95	3505	10754.5
3510	9987.38	3510	7297.7	0.20705	8750.5	3510	10147.6	3510	8678.67	3510	8924.95	3510	10751.6
3515	9996.18	3515	7285.98	0.20735	8741.71	3515	10147.6	3515	8669.87	3515	8910.29	3515	10754.5
3520	9990.31	3520	7280.11	0.2075	8737.31	3520	10144.7	3520	8664.01	3520	8904.43	3520	10757.4
3525	9984.45	3525	7277.18	0.20765	8732.91	3525	10138.8	3525	8658.14	3525	8895.63	3525	10757.4
3530	9981.52	3530	7274.25	0.2078	8728.51	3530	10135.9	3530	8644.95	3530	8875.11	3530	10754.5
3535	9984.45	3535	7268.38	0.2079	8725.58	3535	10130	3535	8630.29	3535	8851.65	3535	10760.4
3540	9981.52	3540	7259.59	0.2082	8716.78	3540	10124.1	3540	8617.1	3540	8825.27	3540	10760.4
3545	9978.58	3545	7256.66	0.2081	8719.72	3545	10124.1	3545	8599.5	3545	8798.88	3545	10760.4
3550	9969.79	3550	7250.79	0.2081	8719.72	3550	10115.3	3550	8581.91	3550	8754.9	3550	10757.4
3555	9975.65	3555	7256.66	0.20805	8721.18	3555	10124.1	3555	8565.79	3555	8716.78	3555	10757.4
3560	9981.52	3560	7250.79	0.20825	8715.32	3560	10130	3560	8552.59	3560	8693.33	3560	10763.3
3565	9966.86	3565	7244.93	0.2084	8710.92	3565	10127.1	3565	8552.59	3565	8699.19	3565	10772.1
3570	9949.26	3570	7239.06	0.20835	8712.39	3570	10121.2	3570	8558.46	3570	8713.85	3570	10772.1
3575	9946.33	3575	7236.13	0.2084	8710.92	3575	10118.3	3575	8578.98	3575	8746.1	3575	10769.2
3580	9940.46	3580	7236.13	0.20845	8709.45	3580	10127.1	3580	8598.04	3580	8784.22	3580	10760.4
3585	9937.53	3585	7233.2	0.2083	8713.85	3585	10127.1	3585	8612.7	3585	8816.47	3585	10760.4
3590	9931.67	3590	7224.4	0.20845	8709.45	3590	10124.1	3590	8628.82	3590	8836.99	3590	10754.5
3595	9925.8	3595	7218.54	0.2085	8707.99	3595	10135.9	3595	8643.48	3595	8866.31	3595	10766.2
3600	9922.87	3600	7209.74	0.20855	8706.52	3600	10135.9	3600	8647.88	3600	8872.18	3600	10769.2
3605	9919.94	3605	7209.74	0.2085	8707.99	3605	10138.8	3605	8655.21	3605	8880.97	3605	10772.1
3610	9908.21	3610	7200.95	0.20855	8706.52	3610	10144.7	3610	8658.14	3610	8883.91	3610	10769.2
3615	9893.55	3615	7198.02	0.2087	8702.12	3615	10147.6	3615	8662.54	3615	8886.84	3615	10778
3620	9873.02	3620	7189.22	0.20905	8691.86	3620	10153.5	3620	8659.61	3620	8886.84	3620	10778
3625	9843.7	3625	7168.7	0.2095	8678.67	3625	10147.6	3625	8652.28	3625	8883.91	3625	10780.9
3630	9826.11	3630	7142.31	0.2102	8658.14	3630	10135.9	3630	8653.75	3630	8892.7	3630	10783.8
3635	9814.38	3635	7121.78	0.2109	8637.62	3635	10130	3635	8644.95	3635	8889.77	3635	10780.9
3640	9817.31	3640	7124.72	0.2111	8631.76	3640	10115.3	3640	8633.22	3640	8886.84	3640	10780.9
3645	9829.04	3645	7145.24	0.211	8634.69	3645	10094.8	3645	8620.03	3645	8875.11	3645	10775
3650	9834.9	3650	7156.97	0.21105	8633.22	3650	10080.2	3650	8606.83	3650	8863.38	3650	10775
3655	9837.83	3655	7159.9	0.21125	8627.36	3655	10065.5	3655	8598.04	3655	8860.45	3655	10783.8
3660	9846.63	3660	7162.83	0.21145	8621.49	3660	10050.8	3660	8589.24	3660	8857.52	3660	10783.8
3665	9843.7	3665	7162.83	0.21165	8615.63	3665	10036.2	3665	8584.84	3665	8863.38	3665	10783.8
3670	9843.7	3670	7159.9	0.21175	8612.7	3670	10021.5	3670	8580.45	3670	8866.31	3670	10780.9
3675	9852.5	3675	7156.97	0.21195	8606.83	3675	10009.8	3675	8581.91	3675	8872.18	3675	10778
3680	9849.56	3680	7171.63	0.2119	8608.3	3680	10006.9	3680	8577.51	3680	8872.18	3680	10775
3685	9855.43	3685	7200.95	0.2116	8617.1	3685	9998.06	3685	8573.12	3685	8875.11	3685	10775
3690	9861.29	3690	7230.27	0.2113	8625.89	3690	9986.33	3690	8568.72	3690	8878.04	3690	10780.9
3695	9864.23	3695	7236.13	0.2113	8625.89	3695	9974.6	3695	8561.39	3695	8875.11	3695	10775
3700	9867.16	3700	7195.08	0.2122	8599.5	3700	9962.88	3700	8559.92	3700	8878.04	3700	10786.8
3705	9867.16	3705	7168.7	0.2127	8584.84	3705	9957.01	3705	8556.99	3705	8883.91	3705	10792.6
3710	9864.23	3710	7174.56	0.21275	8583.38	3710	9945.28	3710	8556.99	3710	8886.84	3710	10795.6
3715	9861.29	3715	7183.36	0.21275	8583.38	3715	9942.35	3715	8548.19	3715	8878.04	3715	10775
3720	9852.5	3720	7177.49	0.2127	8584.84	3720	9933.56	3720	8543.8	3720	8878.04	3720	10760.4
3725	9846.63	3725	7177.49	0.21245	8592.17	3725	9924.76	3725	8548.19	3725	8878.04	3725	10766.2
3730	9840.77	3730	7180.42	0.2125	8590.71	3730	9933.56	3730	8552.59	3730	8872.18	3730	10748.6
3735	9826.11	3735	7180.42	0.2125	8590.71	3735	9948.22	3735	8546.73	3735	8866.31	3735	10745.7
3740	9820.24	3740	7186.29	0.2123	8596.57	3740	9942.35	3740	8539.4	3740	8851.65	3740	10742.8
3745	9814.38	3745	7195.08	0.21215	8600.97	3745	9942.35	3745	8539.4	3745	8845.79	3745	10742.8
3750	9814.38	3750	7200.95	0.21195	8606.83	3750	9948.22	3750	8536.47	3750	8839.93	3750	10754.5
3755	9808.51	3755	7206.81	0.21185	8609.77	3755	9948.22	3755	8535	3755	8831.13	3755	10754.5
3760	9799.72	3760	7218.54	0.21175	8612.7	3760	9954.08	3760	8535	3760	8831.13	3760	10766.2
3765	9796.78	3765	7203.88	0.212	8605.37	3765	9954.08	3765	8535	3765	8836.99	3765	10757.4
3770	9793.85	3770	7189.22	0.2123	8596.57	3770	9948.22	3770	8539.4	3770	8845.79	3770	10760.4
3775	9796.78	3775	7186.29	0.21245	8592.17	3775	9948.22	3775	8537.93	3775	8845.79	3775	10757.4
3780	9805.58	3780	7180.42	0.2127	8584.84	3780	9945.28	3780	8530.6	3780	8836.99	3780	10754.5
3785	9808.51	3785	7165.76	0.21305	8574.58	3785	9939.42	3785	8523.27	3785	8831.13	3785	10760.4
3790	9802.65	3790	7154.04	0.21335	8565.79	3790	9930.62	3790	8517.41	3790	8825.27	3790	10760.4
3795	9799.72	3795	7148.17	0.21345	8562.85	3795	9924.76	3795	8511.54	3795	8819.4	3795	10763.3
3800	9790.92	3800	7139.38	0.21355	8559.92	3800	9918.9	3800	8513.01	3800	8822.33	3800	10757.4
3805	9787.99	3805	7121.78	0.21385	8551.13	3805	9918.9	3805	8510.08	3805	8813.54	3805	10763.3
3810	9785.05	3810	7110.06	0.21405	8545.26	3810	9921.83	3810	8508.61	3810	8810.61	3810	10760.4
3815	9779.19	3815	7107.12	0.21405	8545.26	3815	9921.83	3815	8507.15	3815	8807.67	3815	10751.6
3820	9776.26	3820	7107.12	0.214	8546.73	3820	9921.83	3820	8507.15	3820	8804.74	3820	10757.4
3825	9773.32	3825	7098.33	0.2141	8543.8	3825	9924.76	3825	8507.15	3825	8801.81	3825	10754.5
3830	9761.6	3830	7083.67	0.21425	8539.4	3830	9927.69	3830	8504.21	3830	8793.01	3830	10760.4
3835	9758.66	3835	7080.74	0.2143	8537.93	3835	9930.62	3835	8510.08	3835	8798.88	3835	10757.4
3840	9755.73	3840	7074.87	0.2144	8535	3840	9936.49	3840	8511.54	3840	8801.81	3840	10754.5
3845	9749.87	3845	7069.01	0.2144	8535	3845	9936.49	3845	8507.15	3845	8793.01	3845	10763.3
3850	9741.07	3850	7069.01	0.2144	8535	3850	9936.49	3850	8511.54	3850	8795.95	3850	10754.5
3855	9729.34	3855	7060.21	0.21455	8530.6	3855	9942.35	3855	8511.54	3855	8795.95	3855	10754.5
3860	9711.75	3860	7060.21	0.2145	8532.07	3860	9942.35	3860	8510.08	3860	8793.01	3860	10789.7
3865	9685.36	3865	7060.21	0.21435	8536.47	3865	9942.35	3865	8508.61	3865	8787.15	3865	10839.5
3870	9632.57	3870	7066.08	0.2143	8537.93	3870	9945.28	3870	8513.01	3870	8787.15	3870	10798.5
3875	9568.06	3875	7069.01	0.21435	8536.47	3875	9954.08	3875	8510.08	3875	8784.22	3875	10766.2
3880	9491.82	3880	7071.94	0.21435	8536.47	3880	9951.15	3880	8510.08	3880	8790.08	3880	10763.3
3885	9400.92	3885	7071.94	0.21435	8536.47	3885	9945.28	3885	8505.68	3885	8784.22	3885	10769.2
3890	9304.16	3890	7077.81	0.21435	8536.47	3890	9942.35	3890	8502.75	3890	8778.35	3890	10769.2
3895	9204.46	3895	7083.67	0.2143	8537.93	3895	9942.35	3895	8501.28	3895	8781.29	3895	10769.2
3900	9137.02	3900	7089.53	0.21435	8536.47	3900	9936.49	3900	8498.35	3900	8778.35	3900	10766.2
3905	9098.9	3905	7092.47	0.21455	8530.6	3905	9933.56	3905	8488.09	3905	8766.63	3905	10775
3910	9098.9	3910	7095.4	0.2145	8532.07	3910	9924.76	3910	8482.22	3910	8769.56	3910	10772.1
3915	9142.88	3915	7092.47	0.21465	8527.67	3915	9910.1	3915	8477.83	3915	8760.76	3915	10763.3
3920	9210.32	3920	7098.33	0.2148	8523.27	3920	9910.1	3920	8474.89	3920	8760.76	3920	10763.3
3925	9286.56	3925	7101.26	0.2147	8526.2	3925	9904.24	3925	8467.56	3925	8760.76	3925	10763.3
3930	9374.53	3930	7118.85	0.21455	8530.6	3930	9889.58	3930	8467.56	3930	8757.83	3930	10757.4
3935	9459.57	3935	7124.72	0.2146	8529.14	3935	9892.51	3935	8466.1	3935	8763.69	3935	10769.2
3940	9535.81	3940	7118.85	0.21485	8521.81	3940	9883.71	3940	8461.7	3940	8763.69	3940	10775
3945	9603.25	3945	7110.06	0.21505	8515.94	3945	9874.92	3945	8455.84	3945	8760.76	3945	10775
3950	9653.1	3950	7095.4	0.21545	8504.21	3950	9866.12	3950	8452.9	3950	8757.83	3950	10766.2
3955	9691.22	3955	7089.53	0.2155	8502.75	3955	9863.19	3955	8451.44	3955	8763.69	3955	10769.2
3960	9717.61	3960	7086.6	0.21555	8501.28	3960	9854.39	3960	8451.44	3960	8760.76	3960	10766.2
3965	9723.48	3965	7077.81	0.2157	8496.88	3965	9857.32	3965	8448.51	3965	8754.9	3965	10769.2
3970	9723.48	3970	7071.94	0.216	8488.09	3970	9857.32	3970	8452.9	3970	8763.69	3970	10766.2
3975	9720.54	3975	7074.87	0.21595	8489.55	3975	9857.32	3975	8444.11	3975	8757.83	3975	10778
3980	9720.54	3980	7074.87	0.216	8488.09	3980	9845.6	3980	8442.64	3980	8754.9	3980	10780.9
3985	9717.61	3985	7080.74	0.2158	8493.95	3985	9845.6	3985	8441.18	3985	8754.9	3985	10783.8
3990	9729.34	3990	7074.87	0.2161	8485.16	3990	9842.66	3990	8444.11	3990	8754.9	3990	10778
3995	9729.34	3995	7069.01	0.2162	8482.22	3995	9848.53	3995	8433.85	3995	8746.1	3995	10775
4000	9735.2	4000	7069.01	0.2162	8482.22	4000	9836.8	4000	8435.31	4000	8749.04	4000	10783.8
4005	9741.07	4005	7066.08	0.2163	8479.29	4005	9836.8	4005	8435.31	4005	8749.04	4005	10780.9
4010	9746.93	4010	7069.01	0.21635	8477.83	4010	9836.8	4010	8435.31	4010	8751.97	4010	10792.6
4015	9738.14	4015	7074.87	0.21625	8480.76	4015	9833.87	4015	8432.38	4015	8751.97	4015	10783.8
4020	9729.34	4020	7074.87	0.2162	8482.22	4020	9828	4020	8432.38	4020	8751.97	4020	10778
4025	9723.48	4025	7063.15	0.2164	8476.36	4025	9828	4025	8433.85	4025	8751.97	4025	10769.2
4030	9723.48	4030	7060.21	0.2164	8476.36	4030	9830.94	4030	8430.91	4030	8746.1	4030	10772.1
4035	9717.61	4035	7054.35	0.2166	8470.5	4035	9830.94	4035	8430.91	4035	8743.17	4035	10754.5
4040	9720.54	4040	7042.62	0.2166	8470.5	4040	9833.87	4040	8426.52	4040	8740.24	4040	10757.4
4045	9720.54	4045	7030.89	0.2168	8464.63	4045	9828	4045	8432.38	4045	8740.24	4045	10754.5
4050	9714.68	4050	7013.3	0.2172	8452.9	4050	9839.73	4050	8429.45	4050	8734.38	4050	10757.4
4055	9714.68	4055	7001.57	0.21735	8448.51	4055	9839.73	4055	8427.98	4055	8737.31	4055	10763.3
4060	9717.61	4060	6989.85	0.21765	8439.71	4060	9833.87	4060	8426.52	4060	8731.44	4060	10757.4
4065	9717.61	4065	6981.05	0.2178	8435.31	4065	9836.8	4065	8420.65	4065	8725.58	4065	10751.6
4070	9717.61	4070	6978.12	0.2178	8435.31	4070	9830.94	4070	8417.72	4070	8719.72	4070	10745.7
4075	9720.54	4075	6966.39	0.21785	8433.85	4075	9830.94	4075	8419.19	4075	8719.72	4075	10736.9
4080	9726.41	4080	6957.59	0.218	8429.45	4080	9833.87	4080	8423.59	4080	8719.72	4080	10739.9
4085	9732.27	4085	6940	0.21825	8422.12	4085	9842.66	4085	8422.12	4085	8716.78	4085	10739.9
4090	9729.34	4090	6928.27	0.2184	8417.72	4090	9842.66	4090	8420.65	4090	8710.92	4090	10739.9
4095	9726.41	4095	6922.41	0.21855	8413.32	4095	9845.6	4095	8420.65	4095	8707.99	4095	10736.9
4100	9726.41	4100	6928.27	0.21845	8416.26	4100	9848.53	4100	8420.65	4100	8710.92	4100	10739.9
4105	9723.48	4105	6934.14	0.21835	8419.19	4105	9845.6	4105	8417.72	4105	8705.06	4105	10736.9
4110	9726.41	4110	6934.14	0.2185	8414.79	4110	9845.6	4110	8417.72	4110	8705.06	4110	10731.1
4115	9732.27	4115	6937.07	0.21845	8416.26	4115	9845.6	4115	8410.39	4115	8699.19	4115	10731.1
4120	9729.34	4120	6940	0.21845	8416.26	4120	9836.8	4120	8408.93	4120	8696.26	4120	10728.1
4125	9711.75	4125	6937.07	0.2187	8408.93	4125	9836.8	4125	8403.06	4125	8687.46	4125	10728.1
4130	9700.02	4130	6937.07	0.2188	8405.99	4130	9833.87	4130	8394.27	4130	8681.6	4130	10734
4135	9708.81	4135	6940	0.21885	8404.53	4135	9822.14	4135	8391.33	4135	8681.6	4135	10731.1
4140	9720.54	4140	6940	0.219	8400.13	4140	9816.28	4140	8385.47	4140	8675.74	4140	10728.1
4145	9717.61	4145	6937.07	0.2191	8397.2	4145	9810.41	4145	8381.07	4145	8675.74	4145	10725.2
4150	9714.68	4150	6940	0.21915	8395.73	4150	9801.62	4150	8378.14	4150	8672.8	4150	10725.2
4155	9694.15	4155	6937.07	0.21925	8392.8	4155	9798.68	4155	8375.21	4155	8672.8	4155	10719.3
4160	9656.03	4160	6942.93	0.21905	8398.66	4160	9792.82	4160	8375.21	4160	8675.74	4160	10722.3
4165	9588.59	4165	6942.93	0.21915	8395.73	4165	9789.89	4165	8378.14	4165	8675.74	4165	10719.3
4170	9497.69	4170	6934.14	0.2194	8388.4	4170	9795.75	4170	8369.34	4170	8664.01	4170	10716.4
4175	9386.26	4175	6934.14	0.2195	8385.47	4175	9789.89	4175	8367.88	4175	8666.94	4175	10728.1
4180	9248.44	4180	6940	0.21965	8381.07	4180	9784.02	4180	8362.01	4180	8661.08	4180	10725.2
4185	9093.03	4185	6928.27	0.2201	8367.88	4185	9778.16	4185	8354.68	4185	8661.08	4185	10734
4190	8969.88	4190	6922.41	0.22035	8360.55	4190	9763.5	4190	8345.89	4190	8658.14	4190	10739.9
4195	8917.1	4195	6919.48	0.2204	8359.08	4195	9748.84	4195	8338.56	4195	8652.28	4195	10736.9
4200	8943.49	4200	6910.68	0.2206	8353.22	4200	9740.05	4200	8342.96	4200	8661.08	4200	10748.6
4205	9037.32	4205	6898.95	0.2208	8347.35	4205	9740.05	4205	8340.02	4205	8658.14	4205	10763.3
4210	9181	4210	6896.02	0.22105	8340.02	4210	9737.11	4210	8340.02	4210	8658.14	4210	10780.9
4215	9348.14	4215	6881.36	0.22125	8334.16	4215	9737.11	4215	8334.16	4215	8658.14	4215	10772.1
4220	9503.55	4220	6875.5	0.2214	8329.76	4220	9725.39	4220	8334.16	4220	8655.21	4220	10760.4
4225	9591.52	4225	6875.5	0.2212	8335.63	4225	9728.32	4225	8337.09	4225	8664.01	4225	10760.4
4230	9632.57	4230	6866.7	0.2214	8329.76	4230	9725.39	4230	8342.96	4230	8664.01	4230	10763.3
4235	9653.1	4235	6872.57	0.2215	8326.83	4235	9737.11	4235	8348.82	4235	8678.67	4235	10763.3
4240	9650.17	4240	6869.63	0.22155	8325.36	4240	9734.18	4240	8340.02	4240	8672.8	4240	10760.4
4245	9647.24	4245	6863.77	0.22165	8322.43	4245	9722.45	4245	8342.96	4245	8678.67	4245	10769.2
4250	9635.51	4250	6860.84	0.2218	8318.03	4250	9722.45	4250	8341.49	4250	8675.74	4250	10778
4255	9617.91	4255	6860.84	0.22185	8316.57	4255	9722.45	4255	8342.96	4255	8684.53	4255	10783.8
4260	9597.39	4260	6860.84	0.22205	8310.7	4260	9716.59	4260	8347.35	4260	8696.26	4260	10786.8
4265	9582.73	4265	6866.7	0.22215	8307.77	4265	9713.66	4265	8341.49	4265	8696.26	4265	10780.9
4270	9568.06	4270	6869.63	0.2223	8303.37	4270	9701.93	4270	8335.63	4270	8696.26	4270	10792.6
4275	9547.54	4275	6869.63	0.2227	8291.65	4275	9690.2	4275	8332.69	4275	8702.12	4275	10798.5
4280	9524.08	4280	6866.7	0.22355	8266.72	4280	9678.47	4280	8320.97	4280	8702.12	4280	10801.4
4285	9527.01	4285	6860.84	0.22445	8240.34	4285	9655.02	4285	8296.04	4285	8699.19	4285	10786.8
4290	9529.94	4290	6852.04	0.22545	8211.02	4290	9608.11	4290	8269.66	4290	8693.33	4290	10795.6
4295	9535.81	4295	6840.31	0.2264	8183.16	4295	9561.19	4295	8243.27	4295	8690.4	4295	10795.6
4300	9550.47	4300	6834.45	0.22675	8172.9	4300	9511.35	4300	8221.28	4300	8690.4	4300	10795.6
4305	9556.33	4305	6834.45	0.2267	8174.37	4305	9467.37	4305	8213.95	4305	8690.4	4305	10798.5
4310	9562.2	4310	6837.38	0.2263	8186.09	4310	9452.71	4310	8212.48	4310	8684.53	4310	10795.6
4315	9565.13	4315	6828.59	0.2258	8200.75	4315	9455.64	4315	8222.74	4315	8684.53	4315	10792.6
4320	9576.86	4320	6819.79	0.22505	8222.74	4320	9476.17	4320	8240.34	4320	8681.6	4320	10789.7
4325	9588.59	4325	6834.45	0.22395	8255	4325	9514.28	4325	8268.19	4325	8684.53	4325	10795.6
4330	9594.45	4330	6846.18	0.2231	8279.92	4330	9567.06	4330	8288.71	4330	8675.74	4330	10792.6
4335	9591.52	4335	6846.18	0.2227	8291.65	4335	9616.9	4335	8309.24	4335	8678.67	4335	10795.6
4340	9591.52	4340	6840.31	0.22265	8293.11	4340	9655.02	4340	8319.5	4340	8675.74	4340	10798.5
4345	9594.45	4345	6831.52	0.22275	8290.18	4345	9678.47	4345	8323.9	4345	8675.74	4345	10801.4
4350	9591.52	4350	6819.79	0.22295	8284.32	4350	9687.27	4350	8331.23	4350	8687.46	4350	10804.4
4355	9585.66	4355	6808.06	0.22315	8278.45	4355	9690.2	4355	8331.23	4355	8687.46	4355	10801.4
4360	9585.66	4360	6802.2	0.22335	8272.59	4360	9690.2	4360	8332.69	4360	8690.4	4360	10801.4
4365	9582.73	4365	6793.4	0.2234	8271.12	4365	9690.2	4365	8328.3	4365	8687.46	4365	10804.4
4370	9579.79	4370	6787.54	0.22345	8269.66	4370	9684.34	4370	8331.23	4370	8687.46	4370	10810.2
4375	9571	4375	6778.74	0.2236	8265.26	4375	9690.2	4375	8332.69	4375	8687.46	4375	10813.2
4380	9571	4380	6772.88	0.2237	8262.33	4380	9693.13	4380	8331.23	4380	8684.53	4380	10813.2
4385	9565.13	4385	6775.81	0.22365	8263.79	4385	9693.13	4385	8331.23	4385	8684.53	4385	10813.2
4390	9559.27	4390	6772.88	0.22385	8257.93	4390	9693.13	4390	8332.69	4390	8687.46	4390	10804.4
4395	9550.47	4395	6764.08	0.22395	8255	4395	9693.13	4395	8325.36	4395	8681.6	4395	10810.2
4400	9559.27	4400	6764.08	0.2238	8259.39	4400	9684.34	4400	8325.36	4400	8678.67	4400	10810.2
4405	9550.47	4405	6769.95	0.2237	8262.33	4405	9687.27	4405	8329.76	4405	8678.67	4405	10816.1
4410	9532.88	4410	6761.15	0.224	8253.53	4410	9696.07	4410	8332.69	4410	8684.53	4410	10816.1
4415	9529.94	4415	6764.08	0.2241	8250.6	4415	9696.07	4415	8328.3	4415	8684.53	4415	10816.1
4420	9535.81	4420	6764.08	0.224	8253.53	4420	9687.27	4420	8320.97	4420	8678.67	4420	10821.9
4425	9532.88	4425	6769.95	0.22385	8257.93	4425	9678.47	4425	8320.97	4425	8672.8	4425	10827.8
4430	9529.94	4430	6764.08	0.224	8253.53	4430	9684.34	4430	8319.5	4430	8666.94	4430	10821.9
4435	9521.15	4435	6767.02	0.224	8253.53	4435	9687.27	4435	8318.03	4435	8666.94	4435	10819
4440	9512.35	4440	6767.02	0.2241	8250.6	4440	9684.34	4440	8320.97	4440	8675.74	4440	10819
4445	9509.42	4445	6761.15	0.22425	8246.2	4445	9681.41	4445	8318.03	4445	8675.74	4445	10816.1
4450	9509.42	4450	6755.29	0.22435	8243.27	4450	9675.54	4450	8318.03	4450	8678.67	4450	10816.1
4455	9506.49	4455	6746.49	0.2245	8238.87	4455	9672.61	4455	8323.9	4455	8690.4	4455	10821.9
4460	9491.82	4460	6740.63	0.2246	8235.94	4460	9672.61	4460	8328.3	4460	8699.19	4460	10816.1
4465	9474.23	4465	6731.83	0.2249	8227.14	4465	9672.61	4465	8331.23	4465	8705.06	4465	10816.1
4470	9459.57	4470	6734.76	0.2249	8227.14	4470	9672.61	4470	8318.03	4470	8687.46	4470	10827.8
4475	9444.91	4475	6734.76	0.2248	8230.07	4475	9663.81	4475	8320.97	4475	8696.26	4475	10830.7
4480	9427.31	4480	6737.7	0.22485	8228.61	4480	9660.88	4480	8319.5	4480	8687.46	4480	10821.9
4485	9418.52	4485	6746.49	0.22485	8228.61	4485	9666.75	4485	8316.57	4485	8687.46	4485	10819
4490	9403.86	4490	6746.49	0.22485	8228.61	4490	9660.88	4490	8312.17	4490	8687.46	4490	10824.9
4495	9397.99	4495	6758.22	0.22455	8237.4	4495	9652.09	4495	8313.64	4495	8690.4	4495	10819
4500	9392.13	4500	6764.08	0.22455	8237.4	4500	9652.09	4500	8315.1	4500	8687.46	4500	10821.9
4505	9380.4	4505	6772.88	0.2244	8241.8	4505	9657.95	4505	8310.7	4505	8684.53	4505	10827.8
4510	9377.47	4510	6769.95	0.2244	8241.8	4510	9652.09	4510	8307.77	4510	8678.67	4510	10836.6
4515	9374.53	4515	6767.02	0.22445	8240.34	4515	9652.09	4515	8309.24	4515	8678.67	4515	10842.5
4520	9359.87	4520	6758.22	0.22465	8234.47	4520	9655.02	4520	8310.7	4520	8681.6	4520	10842.5
4525	9339.35	4525	6761.15	0.2248	8230.07	4525	9655.02	4525	8309.24	4525	8681.6	4525	10842.5
4530	9315.89	4530	6764.08	0.225	8224.21	4530	9652.09	4530	8301.91	4530	8678.67	4530	10839.5
4535	9301.23	4535	6764.08	0.2253	8215.41	4535	9640.36	4535	8301.91	4535	8693.33	4535	10848.3
4540	9283.63	4540	6767.02	0.2255	8209.55	4540	9625.7	4540	8294.58	4540	8696.26	4540	10863
4545	9274.84	4545	6767.02	0.22575	8202.22	4545	9608.11	4545	8287.25	4545	8696.26	4545	10886.5
4550	9289.5	4550	6775.81	0.22575	8202.22	4550	9593.45	4550	8281.38	4550	8699.19	4550	10892.3
4555	9312.95	4555	6775.81	0.2259	8197.82	4555	9578.79	4555	8274.05	4555	8693.33	4555	10877.7
4560	9321.75	4560	6778.74	0.22595	8196.36	4560	9569.99	4560	8268.19	4560	8690.4	4560	10860.1
4565	9330.55	4565	6775.81	0.22605	8193.42	4565	9561.19	4565	8263.79	4565	8687.46	4565	10868.9
4570	9333.48	4570	6769.95	0.2261	8191.96	4570	9555.33	4570	8259.39	4570	8681.6	4570	10868.9
4575	9333.48	4575	6769.95	0.2261	8191.96	4575	9552.4	4575	8263.79	4575	8687.46	4575	10860.1
4580	9339.35	4580	6769.95	0.22595	8196.36	4580	9555.33	4580	8263.79	4580	8687.46	4580	10854.2
4585	9342.28	4585	6769.95	0.2259	8197.82	4585	9555.33	4585	8263.79	4585	8678.67	4585	10845.4
4590	9327.62	4590	6769.95	0.22585	8199.29	4590	9564.13	4590	8269.66	4590	8687.46	4590	10839.5
4595	9304.16	4595	6767.02	0.22595	8196.36	4595	9567.06	4595	8269.66	4595	8684.53	4595	10848.3
4600	9277.77	4600	6764.08	0.226	8194.89	4600	9569.99	4600	8266.72	4600	8681.6	4600	10839.5
4605	9254.31	4605	6761.15	0.22595	8196.36	4605	9567.06	4605	8266.72	4605	8681.6	4605	10851.3
4610	9242.58	4610	6758.22	0.22605	8193.42	4610	9567.06	4610	8268.19	4610	8678.67	4610	10851.3
4615	9233.78	4615	6761.15	0.2259	8197.82	4615	9572.92	4615	8263.79	4615	8672.8	4615	10854.2
4620	9242.58	4620	6758.22	0.22605	8193.42	4620	9569.99	4620	8265.26	4620	8669.87	4620	10848.3
4625	9260.17	4625	6764.08	0.226	8194.89	4625	9575.85	4625	8260.86	4625	8666.94	4625	10848.3
4630	9295.36	4630	6764.08	0.226	8194.89	4630	9569.99	4630	8256.46	4630	8661.08	4630	10851.3
4635	9312.95	4635	6764.08	0.22605	8193.42	4635	9567.06	4635	8257.93	4635	8664.01	4635	10857.1
4640	9321.75	4640	6758.22	0.2261	8191.96	4640	9567.06	4640	8256.46	4640	8664.01	4640	10865.9
4645	9318.82	4645	6752.36	0.2262	8189.03	4645	9564.13	4645	8256.46	4645	8661.08	4645	10868.9
4650	9295.36	4650	6737.7	0.2264	8183.16	4650	9567.06	4650	8257.93	4650	8664.01	4650	10865.9
4655	9263.11	4655	6731.83	0.2264	8183.16	4655	9567.06	4655	8259.39	4655	8664.01	4655	10871.8
4660	9230.85	4660	6728.9	0.2265	8180.23	4660	9569.99	4660	8263.79	4660	8666.94	4660	10880.6
4665	9201.53	4665	6731.83	0.22635	8184.63	4665	9575.85	4665	8265.26	4665	8672.8	4665	10871.8
4670	9175.14	4670	6725.97	0.2265	8180.23	4670	9572.92	4670	8269.66	4670	8675.74	4670	10874.7
4675	9148.75	4675	6717.17	0.22675	8172.9	4675	9578.79	4675	8269.66	4675	8678.67	4675	10874.7
4680	9128.22	4680	6711.31	0.22695	8167.04	4680	9575.85	4680	8268.19	4680	8681.6	4680	10868.9
4685	9128.22	4685	6711.31	0.22695	8167.04	4685	9569.99	4685	8263.79	4685	8678.67	4685	10874.7
4690	9139.95	4690	6711.31	0.227	8165.57	4690	9564.13	4690	8260.86	4690	8672.8	4690	10871.8
4695	9178.07	4695	6714.24	0.22705	8164.1	4695	9564.13	4695	8257.93	4695	8669.87	4695	10871.8
4700	9213.26	4700	6711.31	0.22725	8158.24	4700	9561.19	4700	8252.06	4700	8664.01	4700	10877.7
4705	9230.85	4705	6711.31	0.22755	8149.44	4705	9555.33	4705	8247.67	4705	8664.01	4705	10880.6
4710	9222.05	4710	6717.17	0.2278	8142.11	4710	9546.53	4710	8237.4	4710	8661.08	4710	10886.5
4715	9201.53	4715	6711.31	0.2282	8130.39	4715	9528.94	4715	8219.81	4715	8646.42	4715	10889.4
4720	9181	4720	6714.24	0.2283	8127.45	4720	9508.42	4720	8215.41	4720	8655.21	4720	10892.3
4725	9163.41	4725	6720.1	0.22825	8128.92	4725	9490.83	4725	8205.15	4725	8643.48	4725	10895.2
4730	9154.61	4730	6723.04	0.22835	8125.99	4730	9482.03	4730	8203.69	4730	8643.48	4730	10904
4735	9148.75	4735	6723.04	0.2283	8127.45	4735	9479.1	4735	8197.82	4735	8640.55	4735	10904
4740	9148.75	4740	6725.97	0.2281	8133.32	4740	9470.3	4740	8197.82	4740	8637.62	4740	10901.1
4745	9163.41	4745	6720.1	0.2281	8133.32	4745	9473.23	4745	8202.22	4745	8637.62	4745	10898.2
4750	9175.14	4750	6720.1	0.228	8136.25	4750	9482.03	4750	8203.69	4750	8634.69	4750	10909.9
4755	9192.73	4755	6723.04	0.22795	8137.72	4755	9487.89	4755	8203.69	4755	8628.82	4755	10904
4760	9207.39	4760	6723.04	0.2279	8139.18	4760	9493.76	4760	8202.22	4760	8625.89	4760	10907
4765	9216.19	4765	6725.97	0.22775	8143.58	4765	9493.76	4765	8208.08	4765	8634.69	4765	10909.9
4770	9219.12	4770	6728.9	0.2277	8145.05	4770	9496.69	4770	8206.62	4770	8625.89	4770	10907
4775	9210.32	4775	6725.97	0.22775	8143.58	4775	9502.55	4775	8206.62	4775	8625.89	4775	10904
4780	9195.66	4780	6728.9	0.2278	8142.11	4780	9502.55	4780	8209.55	4780	8631.76	4780	10901.1
4785	9183.93	4785	6725.97	0.2278	8142.11	4785	9502.55	4785	8209.55	4785	8637.62	4785	10895.2
4790	9172.2	4790	6725.97	0.22775	8143.58	4790	9496.69	4790	8215.41	4790	8646.42	4790	10895.2
4795	9169.27	4795	6723.04	0.22775	8143.58	4795	9499.62	4795	8221.28	4795	8655.21	4795	10889.4
4800	9175.14	4800	6723.04	0.2277	8145.05	4800	9502.55	4800	8227.14	4800	8664.01	4800	10889.4
4805	9178.07	4805	6725.97	0.2275	8150.91	4805	9505.49	4805	8225.68	4805	8658.14	4805	10886.5
4810	9183.93	4810	6734.76	0.2273	8156.77	4810	9508.42	4810	8227.14	4810	8652.28	4810	10883.5
4815	9192.73	4815	6734.76	0.2271	8162.64	4815	9517.21	4815	8228.61	4815	8652.28	4815	10889.4
4820	9204.46	4820	6731.83	0.22695	8167.04	4820	9520.15	4820	8237.4	4820	8658.14	4820	10904
4825	9216.19	4825	6728.9	0.2268	8171.43	4825	9531.87	4825	8244.73	4825	8661.08	4825	10921.6
4830	9222.05	4830	6725.97	0.22665	8175.83	4830	9543.6	4830	8250.6	4830	8661.08	4830	10924.6
4835	9230.85	4835	6723.04	0.2265	8180.23	4835	9555.33	4835	8259.39	4835	8666.94	4835	10904
4840	9236.72	4840	6723.04	0.2265	8180.23	4840	9567.06	4840	8268.19	4840	8672.8	4840	10904
4845	9233.78	4845	6723.04	0.22615	8190.49	4845	9578.79	4845	8268.19	4845	8672.8	4845	10904
4850	9233.78	4850	6717.17	0.226	8194.89	4850	9578.79	4850	8279.92	4850	8675.74	4850	10904
4855	9224.99	4855	6723.04	0.22565	8205.15	4855	9599.31	4855	8287.25	4855	8675.74	4855	10901.1
4860	9230.85	4860	6720.1	0.22535	8213.95	4860	9613.97	4860	8294.58	4860	8675.74	4860	10898.2
4865	9219.12	4865	6717.17	0.2251	8221.28	4865	9628.63	4865	8301.91	4865	8669.87	4865	10909.9
4870	9216.19	4870	6720.1	0.22485	8228.61	4870	9649.15	4870	8309.24	4870	8666.94	4870	10904
4875	9207.39	4875	6725.97	0.22475	8231.54	4875	9666.75	4875	8313.64	4875	8664.01	4875	10895.2
4880	9204.46	4880	6731.83	0.22455	8237.4	4880	9678.47	4880	8307.77	4880	8652.28	4880	10898.2
4885	9204.46	4885	6734.76	0.2245	8238.87	4885	9678.47	4885	8313.64	4885	8658.14	4885	10892.3
4890	9198.6	4890	6740.63	0.22435	8243.27	4890	9684.34	4890	8318.03	4890	8666.94	4890	10907
4895	9195.66	4895	6740.63	0.2243	8244.73	4895	9684.34	4895	8319.5	4895	8666.94	4895	10912.8
4900	9195.66	4900	6743.56	0.22425	8246.2	4900	9687.27	4900	8316.57	4900	8658.14	4900	10915.8
4905	9195.66	4905	6740.63	0.2243	8244.73	4905	9690.2	4905	8318.03	4905	8661.08	4905	10918.7
4910	9186.87	4910	6746.49	0.2243	8244.73	4910	9690.2	4910	8316.57	4910	8658.14	4910	10918.7
4915	9183.93	4915	6749.42	0.22425	8246.2	4915	9690.2	4915	8313.64	4915	8658.14	4915	10927.5
4920	9186.87	4920	6740.63	0.22425	8246.2	4920	9684.34	4920	8312.17	4920	8655.21	4920	10921.6
4925	9183.93	4925	6740.63	0.22425	8246.2	4925	9684.34	4925	8312.17	4925	8646.42	4925	10912.8
4930	9178.07	4930	6743.56	0.2242	8247.67	4930	9693.13	4930	8313.64	4930	8649.35	4930	10912.8
4935	9172.2	4935	6743.56	0.2243	8244.73	4935	9693.13	4935	8313.64	4935	8649.35	4935	10924.6
4940	9166.34	4940	6740.63	0.22445	8240.34	4940	9693.13	4940	8312.17	4940	8652.28	4940	10912.8
4945	9163.41	4945	6749.42	0.22435	8243.27	4945	9687.27	4945	8310.7	4945	8655.21	4945	10918.7
4950	9151.68	4950	6749.42	0.2243	8244.73	4950	9681.41	4950	8307.77	4950	8652.28	4950	10912.8
4955	9134.09	4955	6746.49	0.22435	8243.27	4955	9678.47	4955	8313.64	4955	8661.08	4955	10909.9
4960	9119.42	4960	6749.42	0.2242	8247.67	4960	9681.41	4960	8310.7	4960	8655.21	4960	10918.7
4965	9101.83	4965	6755.29	0.2241	8250.6	4965	9681.41	4965	8313.64	4965	8655.21	4965	10915.8
4970	9093.03	4970	6761.15	0.224	8253.53	4970	9687.27	4970	8312.17	4970	8652.28	4970	10918.7
4975	9078.37	4975	6758.22	0.2241	8250.6	4975	9687.27	4975	8310.7	4975	8649.35	4975	10918.7
4980	9057.85	4980	6755.29	0.2241	8250.6	4980	9687.27	4980	8312.17	4980	8655.21	4980	10933.4
4985	9043.18	4985	6746.49	0.22425	8246.2	4985	9684.34	4985	8315.1	4985	8658.14	4985	10939.2
4990	9040.25	4990	6740.63	0.22435	8243.27	4990	9687.27	4990	8313.64	4990	8655.21	4990	10933.4
4995	9037.32	4995	6737.7	0.2245	8238.87	4995	9687.27	4995	8315.1	4995	8658.14	4995	10936.3
5000	9031.45	5000	6731.83	0.2246	8235.94	5000	9687.27	5000	8313.64	5000	8661.08	5000	10942.2
5005	9028.52	5005	6728.9	0.2247	8233.01	5005	9681.41	5005	8318.03	5005	8669.87	5005	10936.3
5010	9016.79	5010	6731.83	0.22465	8234.47	5010	9681.41	5010	8319.5	5010	8675.74	5010	10933.4
5015	9008	5015	6737.7	0.22455	8237.4	5015	9678.47	5015	8320.97	5015	8678.67	5015	10930.4
5020	8978.67	5020	6740.63	0.22445	8240.34	5020	9678.47	5020	8323.9	5020	8684.53	5020	10936.3
5025	8958.15	5025	6740.63	0.22435	8243.27	5025	9678.47	5025	8326.83	5025	8687.46	5025	10933.4
5030	8934.69	5030	6728.9	0.22435	8243.27	5030	9681.41	5030	8331.23	5030	8690.4	5030	10930.4
5035	8908.3	5035	6717.17	0.2245	8238.87	5035	9687.27	5035	8340.02	5035	8696.26	5035	10933.4
5040	8881.91	5040	6708.38	0.22465	8234.47	5040	9699	5040	8340.02	5040	8693.33	5040	10927.5
5045	8870.18	5045	6705.44	0.2246	8235.94	5045	9701.93	5045	8338.56	5045	8690.4	5045	10918.7
5050	8867.25	5050	6702.51	0.2247	8233.01	5050	9701.93	5050	8342.96	5050	8693.33	5050	10915.8
5055	8878.98	5055	6708.38	0.2248	8230.07	5055	9707.79	5055	8342.96	5055	8696.26	5055	10918.7
5060	8896.57	5060	6708.38	0.22495	8225.68	5060	9704.86	5060	8338.56	5060	8699.19	5060	10907
5065	8931.76	5065	6702.51	0.225	8224.21	5065	9693.13	5065	8332.69	5065	8696.26	5065	10924.6
5070	8969.88	5070	6711.31	0.2247	8233.01	5070	9684.34	5070	8335.63	5070	8699.19	5070	10936.3
5075	9002.13	5075	6708.38	0.2246	8235.94	5075	9687.27	5075	8337.09	5075	8693.33	5075	10939.2
5080	9025.59	5080	6708.38	0.22465	8234.47	5080	9696.07	5080	8338.56	5080	8687.46	5080	10948
5085	9037.32	5085	6705.44	0.22475	8231.54	5085	9704.86	5085	8334.16	5085	8681.6	5085	10951
5090	9043.18	5090	6702.51	0.2249	8227.14	5090	9701.93	5090	8335.63	5090	8687.46	5090	10968.5
5095	9040.25	5095	6699.58	0.22495	8225.68	5095	9699	5095	8334.16	5095	8690.4	5095	10968.5
5100	9028.52	5100	6690.78	0.22495	8225.68	5100	9693.13	5100	8328.3	5100	8678.67	5100	10968.5
5105	9025.59	5105	6687.85	0.2252	8218.35	5105	9693.13	5105	8331.23	5105	8675.74	5105	10971.5
5110	9028.52	5110	6684.92	0.2253	8215.41	5110	9701.93	5110	8318.03	5110	8661.08	5110	10980.3
5115	9028.52	5115	6687.85	0.22525	8216.88	5115	9690.2	5115	8318.03	5115	8664.01	5115	10992
5120	9031.45	5120	6679.06	0.22545	8211.02	5120	9687.27	5120	8318.03	5120	8664.01	5120	10992
5125	9031.45	5125	6679.06	0.22545	8211.02	5125	9687.27	5125	8322.43	5125	8675.74	5125	10983.2
5130	9034.39	5130	6676.12	0.22565	8205.15	5130	9684.34	5130	8328.3	5130	8687.46	5130	10974.4
5135	9025.59	5135	6670.26	0.2257	8203.69	5135	9684.34	5135	8322.43	5135	8684.53	5135	10971.5
5140	9016.79	5140	6664.4	0.22585	8199.29	5140	9675.54	5140	8323.9	5140	8684.53	5140	10968.5
5145	9005.06	5145	6667.33	0.22565	8205.15	5145	9678.47	5145	8322.43	5145	8684.53	5145	10977.3
5150	8975.74	5150	6684.92	0.2254	8212.48	5150	9675.54	5150	8328.3	5150	8687.46	5150	10974.4
5155	8925.89	5155	6693.72	0.22535	8213.95	5155	9684.34	5155	8325.36	5155	8684.53	5155	10974.4
5160	8849.65	5160	6696.65	0.22525	8216.88	5160	9681.41	5160	8323.9	5160	8687.46	5160	10974.4
5165	8735.29	5165	6702.51	0.22515	8219.81	5165	9675.54	5165	8325.36	5165	8687.46	5165	10959.7
5170	8618	5170	6696.65	0.22515	8219.81	5170	9678.47	5170	8323.9	5170	8684.53	5170	10956.8
5175	8480.18	5175	6705.44	0.22455	8237.4	5175	9678.47	5175	8328.3	5175	8687.46	5175	10953.9
5180	8374.62	5180	6714.24	0.22415	8249.13	5180	9684.34	5180	8342.96	5180	8690.4	5180	10951
5185	8321.84	5185	6717.17	0.22435	8243.27	5185	9710.73	5185	8348.82	5185	8687.46	5185	10936.3
5190	8324.77	5190	6717.17	0.22465	8234.47	5190	9725.39	5190	8340.02	5190	8684.53	5190	10921.6
5195	8383.42	5195	6717.17	0.22465	8234.47	5195	9710.73	5195	8332.69	5195	8687.46	5195	10921.6
5200	8480.18	5200	6720.1	0.22475	8231.54	5200	9693.13	5200	8329.76	5200	8681.6	5200	10907
5205	8609.21	5205	6723.04	0.2248	8230.07	5205	9693.13	5205	8322.43	5205	8675.74	5205	10912.8
5210	8708.9	5210	6714.24	0.225	8224.21	5210	9684.34	5210	8320.97	5210	8678.67	5210	10927.5
5215	8791.01	5215	6702.51	0.22525	8216.88	5215	9678.47	5215	8318.03	5215	8675.74	5215	10956.8
5220	8826.19	5220	6696.65	0.22535	8213.95	5220	9675.54	5220	8316.57	5220	8675.74	5220	10968.5
5225	8840.86	5225	6690.78	0.22555	8208.08	5225	9672.61	5225	8315.1	5225	8672.8	5225	10977.3
5230	8849.65	5230	6690.78	0.22555	8208.08	5230	9672.61	5230	8309.24	5230	8666.94	5230	10974.4
5235	8867.25	5235	6699.58	0.2254	8212.48	5235	9666.75	5235	8309.24	5235	8666.94	5235	10980.3
5240	8876.04	5240	6699.58	0.2255	8209.55	5240	9666.75	5240	8307.77	5240	8664.01	5240	10983.2
5245	8887.77	5245	6705.44	0.22535	8213.95	5245	9666.75	5245	8303.37	5245	8661.08	5245	10980.3
5250	8893.64	5250	6708.38	0.2253	8215.41	5250	9660.88	5250	8303.37	5250	8658.14	5250	10983.2
5255	8902.43	5255	6696.65	0.22565	8205.15	5255	9663.81	5255	8300.44	5255	8652.28	5255	10994.9
5260	8902.43	5260	6693.72	0.226	8194.89	5260	9663.81	5260	8297.51	5260	8655.21	5260	10997.9
5265	8908.3	5265	6693.72	0.2262	8189.03	5265	9655.02	5265	8290.18	5265	8658.14	5265	10997.9
5270	8908.3	5270	6702.51	0.2261	8191.96	5270	9637.43	5270	8284.32	5270	8658.14	5270	10994.9
5275	8899.5	5275	6699.58	0.2261	8191.96	5275	9625.7	5275	8281.38	5275	8655.21	5275	10994.9
5280	8893.64	5280	6705.44	0.22595	8196.36	5280	9622.77	5280	8279.92	5280	8649.35	5280	10997.9
5285	8884.84	5285	6702.51	0.22595	8196.36	5285	9625.7	5285	8284.32	5285	8655.21	5285	10994.9
5290	8876.04	5290	6699.58	0.22605	8193.42	5290	9628.63	5290	8282.85	5290	8649.35	5290	10994.9
5295	8881.91	5295	6699.58	0.226	8194.89	5295	9631.56	5295	8282.85	5295	8652.28	5295	10986.1
5300	8884.84	5300	6696.65	0.226	8194.89	5300	9628.63	5300	8281.38	5300	8646.42	5300	10980.3
5305	8881.91	5305	6693.72	0.2259	8197.82	5305	9631.56	5305	8282.85	5305	8646.42	5305	10974.4
5310	8884.84	5310	6702.51	0.22565	8205.15	5310	9634.49	5310	8288.71	5310	8649.35	5310	10980.3
5315	8893.64	5315	6699.58	0.2255	8209.55	5315	9643.29	5315	8291.65	5315	8649.35	5315	10980.3
5320	8896.57	5320	6708.38	0.2252	8218.35	5320	9649.15	5320	8298.98	5320	8652.28	5320	10983.2
5325	8893.64	5325	6711.31	0.22525	8216.88	5325	9660.88	5325	8304.84	5325	8655.21	5325	10986.1
5330	8887.77	5330	6720.1	0.22505	8222.74	5330	9669.68	5330	8301.91	5330	8655.21	5330	11000.8
5335	8876.04	5335	6725.97	0.2248	8230.07	5335	9663.81	5335	8304.84	5335	8658.14	5335	11000.8
5340	8870.18	5340	6720.1	0.22495	8225.68	5340	9666.75	5340	8310.7	5340	8661.08	5340	11006.7
5345	8855.52	5345	6737.7	0.2247	8233.01	5345	9675.54	5345	8307.77	5345	8658.14	5345	11000.8
5350	8843.79	5350	6805.13	0.2237	8262.33	5350	9672.61	5350	8303.37	5350	8652.28	5350	11000.8
5355	8832.06	5355	6767.02	0.2244	8241.8	5355	9669.68	5355	8297.51	5355	8649.35	5355	11012.5
5360	8823.26	5360	6708.38	0.22555	8208.08	5360	9660.88	5360	8291.65	5360	8640.55	5360	11006.7
5365	8811.53	5365	6687.85	0.22605	8193.42	5365	9657.95	5365	8288.71	5365	8643.48	5365	11012.5
5370	8811.53	5370	6693.72	0.2262	8189.03	5370	9649.15	5370	8282.85	5370	8640.55	5370	11012.5
5375	8802.74	5375	6693.72	0.2262	8189.03	5375	9640.36	5375	8278.45	5375	8646.42	5375	11012.5
5380	8793.94	5380	6687.85	0.22615	8190.49	5380	9625.7	5380	8282.85	5380	8655.21	5380	11030.1
5385	8779.28	5385	6684.92	0.22595	8196.36	5385	9625.7	5385	8290.18	5385	8661.08	5385	11030.1
5390	8767.55	5390	6681.99	0.22585	8199.29	5390	9634.49	5390	8300.44	5390	8666.94	5390	11027.2
5395	8770.48	5395	6679.06	0.225725	8202.95	5395	9649.15	5395	8312.17	5395	8675.74	5395	11030.1
5400	8767.55	5400	6676.12	0.2256	8206.62	5400	9663.81	5400	8322.92	5400	8681.6	5400	11027.2

## Sheet: Synthesis all polymers
PVT 2025
adsorption capacity qe monomere (mmol/g)	19.5891	38.2978	63.0452	75.3463	18.173	24.0254	51.0088	1.75324	3.54356	7.39612	16.1444	0.839727	2.09932	4.19864	7.66794	12.9368	18.2708
stoichiometry monomere:SWCNT X (mmol/g)	21.0191	42.0382	84.0764	126.115	21.0191	42.0382	84.0764	2.10191	4.20382	8.40764	21.0191	0.840764	2.10191	4.20382	8.40764	14.7134	21.0191
dqe uncertainty on adsorption capacity (mmol/g)	1.11271	2.17541	3.58113	4.27986	1.03227	1.36471	2.89743	0.0995886	0.201283	0.420119	0.917042	0.0476986	0.119247	0.238493	0.435558	0.734842	1.03783
dX uncertainty on stoichiometry (mmol/g)	1.19394	2.38788	4.77575	7.16363	1.19394	2.38788	4.77575	0.119394	0.238788	0.477575	1.19394	0.0477575	0.119394	0.238788	0.477575	0.835757	1.19394
PVT 2024
adsorption capacity qe monomere (mmol/g)	1.93186	6.93111	7.17042	16.7724	22.1872	22.5182	25.38	26.6288	27.9541	30.7467
stoichiometry monomere:SWCNT X (mmol/g)	2.52229	5.88535	8.82803	18.4968	28.1656	35.3121	44.5605	51.2866	57.172	65.5796
dqe uncertainty on adsorption capacity (mmol/g)	0.149792	0.526594	0.542694	1.26849	1.67823	1.70361	1.91938	2.01396	2.11395	2.32613
dX uncertainty on stoichiometry (mmol/g)	0.190718	0.445008	0.667512	1.3986	2.12968	2.67005	3.36934	3.87792	4.32293	4.95866
PVK dac
adsorption capacity qe monomere (mmol/g)	35.6952	53.9284	53.699	67.887	69.9458	66.721	72.4428
stoichiometry monomere:SWCNT X (mmol/g)	78.4337	89.6386	103.012	99.3976	108.434	112.554	122.53
dqe uncertainty on adsorption capacity (mmol/g)	1.48373	4.22719	4.23557	5.43897	5.52154	5.29323	5.60891
dX uncertainty on stoichiometry (mmol/g)	2.88974	3.30256	3.79528	3.66212	3.99503	4.14685	4.51439
PVIm
adsorption capacity qe monomere (mmol/g)	37.5216	24.2355	29.7034	34.9614	30.0515	31.3422	39.6496
stoichiometry monomere:SWCNT X (mmol/g)	52.4908	46.2651	53.494	60.3614	61.4458	68.6747	88.5542
dqe uncertainty on adsorption capacity (mmol/g)	1.79803	0.789871	0.936359	1.11702	0.954993	0.983231	1.28294
dX uncertainty on stoichiometry (mmol/g)	1.54577	1.36243	1.57531	1.77755	1.80948	2.02236	2.60778
				X
